# Supplementary material
Source: PubMed Central journal article supplement (PMC6450275)
Supplement: jama-e190692-s001.pdf [file jama-e190692-s001.pdf]

## Supplementary Online Content

Mark DB, Anstrom KJ, Sheng S, et al. Effect of catheter ablation vs medical therapy on quality of life among patients with atrial fibrillation: the CABANA randomized clinical trial [published online March 15, 2019]. *JAMA*. doi:10.1001/jama.2019.0692

eFigure 1: Overall CABANA Trial CONSORT Diagram  
eTable 1: Data Collection in the CABANA Trial Quality of Life Study  
eTable 2: AFEQT Component Scores: Symptoms, Daily Activities, and Treatment Concern  
eTable 3: Duke Activity Status Score  
eTable 4: SF-36 Scores  
eTable 5: Toronto Atrial Fibrillation Severity Score (AFSS) Scores  
eTable 6: EQ-5D Scores  
eTable 7: Stanford Presenteeism Scale (SPS-6) Scores  
eTable 8: Work Productivity And Impairment (WPAI) Scores  
eTable 9: AFEQT Scores in the 6-month Per Protocol Analysis  
eTable 10: AFEQT Scores in the 3-month Per Protocol Analysis  
eTable 11: AFEQT Scores in the 12-month Per Protocol Analysis  
eTable 12: MAFSI Scores in the 6-month Per Protocol Analysis  
eTable 13: MAFSI Scores in the 3-month Per Protocol Analysis  
eTable 14: MAFSI Scores in the 12-month Per Protocol Analysis  
eTable 15: AFEQT Scores with Adjustment for Site and the Site-Treatment Interaction as Random Effects  
eFigure 2: AFEQT Summary Scores in Pre-Specified Subgroups by Intention-to-Treat  
eFigure 3: MAFSI Frequency Scores in Pre-Specified Subgroups by Intention-to-Treat  
eFigure 4: AFEQT Summary Scores in the 6-Month Per Protocol Analysis  
eFigure 5: MAFSI Frequency Scores in the 6-Month Per Protocol Analysis  
eFigure 6: AFEQT Scores by Baseline Tertiles by Intention-to-Treat  
eFigure 7: MAFSI Scores by Baseline Tertiles by Intention-to-Treat  
eFigure 8: AFEQT Summary Scores Illustrative Changes  
eFigure 9: AFEQT Summary Score Responder Analysis  
eFigure 10: MAFSI Frequency Score Responder Analysis  
Supplement References

This supplementary material has been provided by the authors to give readers additional information about their work.

## SUPPLEMENTAL MATERIAL

Effect of Catheter Ablation vs Medical Therapy on Quality of Life Among Patients with Atrial Fibrillation: the CABANA Randomized Clinical Trial

Daniel B. Mark, MD, MPH\*; Kevin J. Anstrom, PhD\*; Shubin Sheng, PhD\*; Jonathan P. Piccini, MD, MHS\*; Khaula N. Baloch, MPH\*; Kristi H. Monahan RN¶; Melanie R. Daniels, BA\*; Tristram D. Bahnson, MD\*; Jeanne E. Poole, MD§; Yves Rosenberg, MD, MPH†; Kerry L. Lee, PhD\*; Douglas L. Packer, MD¶ on behalf of the CABANA Investigators

ClinicalTrials.gov Identifier: NCT00911508

\* Duke Clinical Research Institute, Duke University, Durham, NC

§ University of Washington Medical Center, Seattle, WA

† National Heart, Lung, and Blood Institute, National Institutes of Health, Bethesda, MD

¶ Mayo Clinic, Rochester, MN

Supported by grants U01HL89709, U01HL089786, U01HL089907 and U01HL089645 from the National Heart, Lung, and Blood Institute; St Jude Foundation and Corporation; Biosense Webster Inc; Medtronic Corporation; and Boston Scientific Corporation. The content is solely the responsibility of the authors and does not necessarily represent the official views of the National Heart, Lung, and Blood Institute; the National Institutes of Health; or the US Department of Health and Human Services.

Address for Correspondence: Daniel B. Mark, MD, MPH  
Director, Outcomes Research  
Duke Clinical Research Institute  
P.O. Box 17969  
Durham, NC 27715  
2400 Pratt Street, Room 0311  
Durham, NC 27705  
daniel.mark@duke.edu  
919-668-8775 (Phone)  
919-668-7060 (Fax)

eFigure 1: CABANA Trial CONSORT Diagram

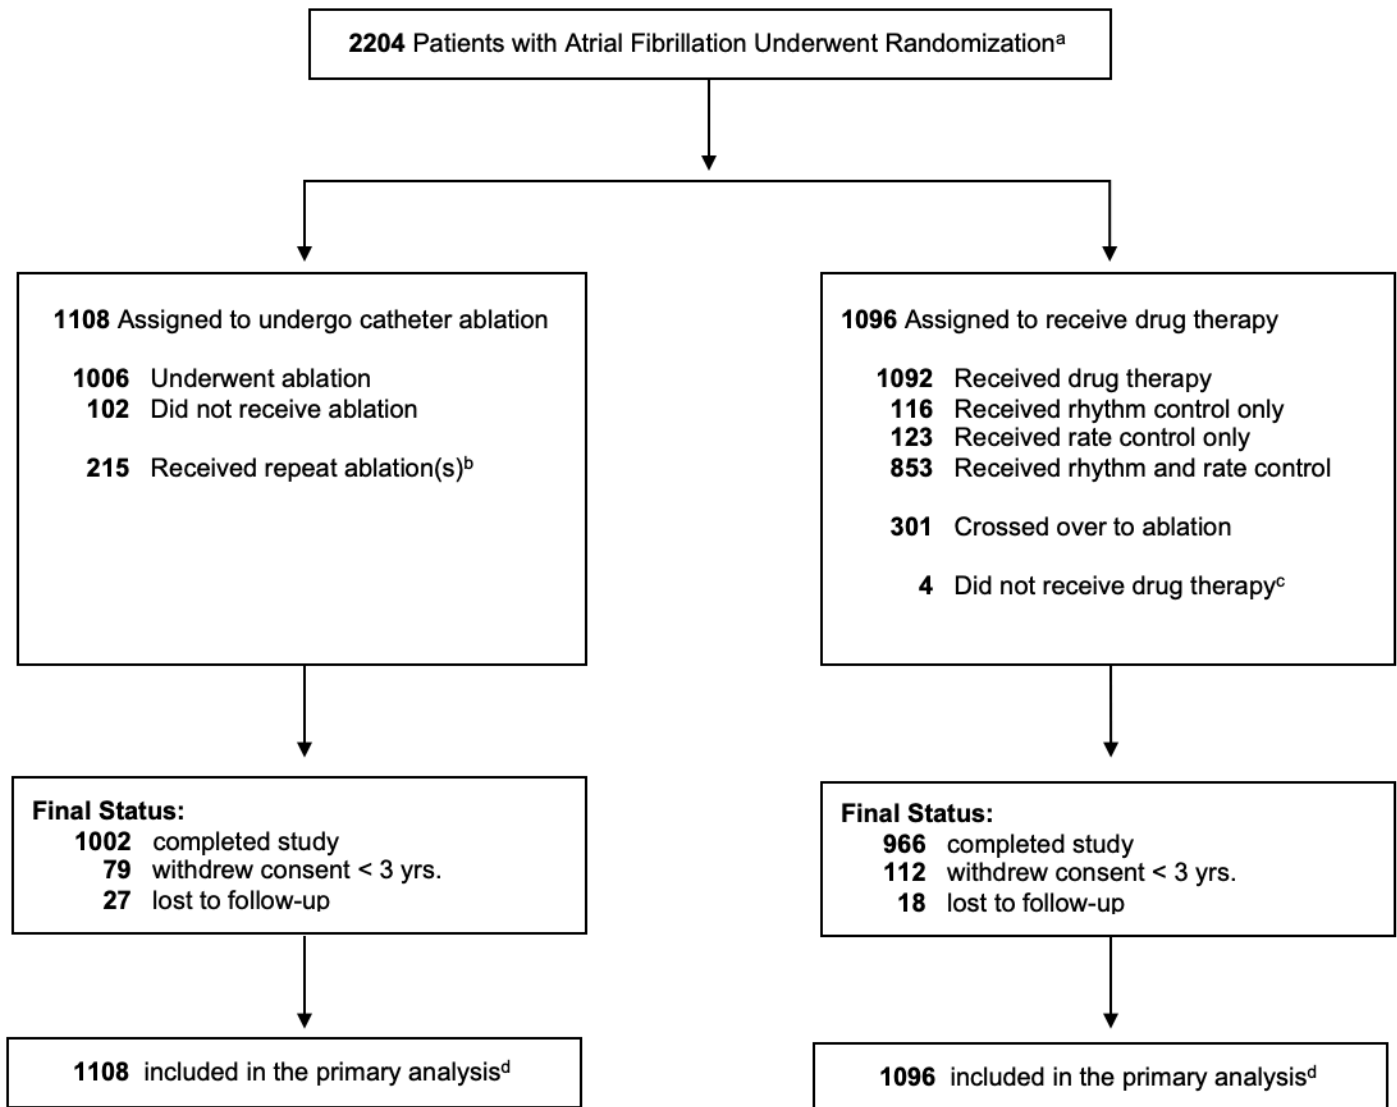

- Sites were not required to provide screening logs during the recruitment phase.
- Twenty-five patients underwent repeat ablation during the blanking period; 190 patients had at least one repeat ablation during the post-blanking period for a total of 215.
- Three patients withdrew consent following randomization assignment. One investigator decided to not start drug.
- Outcomes of patients who did not complete the study (i.e., withdrew consent or were lost to follow-up) were included to the point of consent withdrawal or final contact. Primary and key secondary endpoints were analyzed using time-to-event methodology, thus all available follow-up information was utilized. For patients who did not complete the study and did not experience an outcome event, their time-to-event measure was censored at the last contact date. There was no imputation of outcome events. At the end of the trial, a publically available death registry search was performed for patients enrolled in North America who were lost or withdrew from the trial.

## **Secondary Quality of Life Instruments Used in the CABANA Trial**

The Duke Activity Status Index (DASI)<sup>1</sup> is a 12-item questionnaire used to assess general physical functioning; activities range in physical demands from self-care to strenuous sports. The possible responses to each item are 1 = “Yes, with no difficulty,” 2 = “Yes, but with some difficulty or I couldn’t do this,” and 3 = “Don’t do this for other reasons.” The total score ranges from 0 to 58.2, with lower scores indicating worse physical functioning. A clinically meaningful change in the DASI is 4 points or more.<sup>2</sup>

The Atrial Fibrillation Severity Scale<sup>3</sup> (AFSS) is a 19-item disease-specific questionnaire used to assess AF-related symptoms. For CABANA, we collected the four questions that comprise the Total AF Burden score reflecting frequency, duration, and severity of AF episodes. Total AF Burden scores range from 3 to 30 with higher scores indicating higher burden of disease. One difficulty with the Total AF Burden score is an option to respond, “Not applicable, I have never had an irregular heart rhythm,” which is incompatible with a population already diagnosed with an irregular heart rhythm. This question confused a large portion of our study participants and we modified the scale as a result. In scoring, we imputed the value of this question to be the same as the least burdensome category. We also collected the two questions that comprise the AF Severity score, which asks about the severity of the last AF episode and the first AF episode, with responses scored from 1 to 10 with 1 being severe and 10 being the extremely severe. The score is the arithmetic mean of responses to the two questions. Because the original questionnaire only allowed for patients to score their episodes as “severe” to “extremely severe,” we modified our scale for the AF Severity score such that a score of 1 = “not severe at all” and 10 = “extremely severe.” A clinically meaningful change is 3 points or more.<sup>4</sup>

The SF-36<sup>5</sup> is a 36-item questionnaire used to provide a detailed assessment of functioning and well-being from a generic health status perspective. The instrument provides a Global Health Utility and 8 subscales. The SF-36 asks patients to recall health status “during the past 4 weeks.” Scores range from 0 to 100 with higher scores representing better health status. A clinically meaningful change for a patient using this scoring system has not been established but can be approximated by a ¼ standard deviation, or 5 points or more.

The EQ-5D-3L<sup>6</sup> Health Utility Index is a 5-item questionnaire that measures health status on 5 dimensions: mobility, self-care, usual activities, pain/discomfort, and anxiety/depression. The EQ-5D Visual Analog Scale (VAS) is a vertical, visual analogue scale where the ends are labeled “best imaginable health state” and “worst imaginable health state.” A clinically meaningful change has not been established in the context of atrial fibrillation.

## **Work and Productivity Measures Used in the CABANA Trial**

The 6-item Stanford Presenteeism Scale (SPS) assesses whether or not patients felt they experienced a decrease in their work productivity or below-normal work quality because of their chest pain or symptoms of

coronary artery disease.<sup>7</sup> The Stanford Presenteeism Scale is a generic instrument that uses a 5-point Likert scale ranging from “Strongly Agree” to “Strongly Disagree” to rate six job performance measures over the past month. The responses are then summed to produce a Total Score that ranges from 6 to 30, with higher scores indicating increased work productivity.

The Work Productivity and Impairment Questionnaire (WPAI)<sup>8</sup> is a 6-item questionnaire that assesses the amount of absenteeism, presenteeism, and daily activity impairment attributable to health. WPAI General Health outcomes are expressed as impairment percentages, with higher numbers indicating greater impairment and less productivity, i.e., worse outcomes.

**eTable 1: Data Collection in the CABANA Trial Quality of Life Study**

|          |               | Ablation<br>(N=1108) |       | Drug Therapy<br>(N=1096) |       |
|----------|---------------|----------------------|-------|--------------------------|-------|
|          |               | N                    | %     | N                        | %     |
| Baseline | Collected     | 1098                 | 99.10 | 1090                     | 99.45 |
|          | Not Collected | 10                   | 0.90  | 6                        | 0.55  |
| 3 Month  | Collected     | 1019                 | 91.97 | 1013                     | 92.43 |
|          | Died          | 1                    | 0.09  | 2                        | 0.18  |
|          | Withdrew      | 27                   | 2.44  | 22                       | 2.01  |
|          | Not Collected | 61                   | 5.51  | 59                       | 5.38  |
| 6 Month  | Collected     | 998                  | 90.07 | 995                      | 90.78 |
|          | Died          | 1                    | 0.09  | 8                        | 0.73  |
|          | Withdrew      | 40                   | 3.61  | 37                       | 3.38  |
|          | Not Collected | 69                   | 6.23  | 56                       | 5.11  |
| 12 Month | Collected     | 955                  | 86.19 | 943                      | 86.04 |
|          | Died          | 7                    | 0.63  | 15                       | 1.37  |
|          | Withdrew      | 56                   | 5.05  | 52                       | 4.74  |
|          | Not Collected | 90                   | 8.12  | 86                       | 7.85  |
| 18 Month | Collected     | 929                  | 83.84 | 882                      | 80.47 |
|          | Died          | 9                    | 0.81  | 23                       | 2.10  |
|          | Withdrew      | 66                   | 5.96  | 72                       | 6.57  |
|          | Not Collected | 104                  | 9.39  | 119                      | 10.86 |
| 24 Month | Collected     | 905                  | 81.68 | 847                      | 77.28 |
|          | Died          | 18                   | 1.62  | 32                       | 2.92  |
|          | Withdrew      | 69                   | 6.23  | 90                       | 8.21  |
|          | End of Study  | 20                   | 1.81  | 19                       | 1.73  |
|          | Not Collected | 96                   | 8.66  | 108                      | 9.85  |
| 30 Month | Collected     | 802                  | 72.38 | 753                      | 68.70 |
|          | Died          | 22                   | 1.99  | 36                       | 3.28  |
|          | Withdrew      | 70                   | 6.32  | 103                      | 9.40  |
|          | End of Study  | 100                  | 9.03  | 91                       | 8.30  |
|          | Not Collected | 114                  | 10.29 | 113                      | 10.31 |
| 36 Month | Collected     | 691                  | 62.36 | 653                      | 59.58 |
|          | Died          | 33                   | 2.98  | 40                       | 3.65  |
|          | Withdrew      | 74                   | 6.68  | 111                      | 10.13 |
|          | End of Study  | 207                  | 18.68 | 188                      | 17.15 |
|          | Not Collected | 103                  | 9.30  | 104                      | 9.49  |
| 42 Month | Collected     | 620                  | 55.96 | 583                      | 53.19 |
|          | Died          | 38                   | 3.43  | 42                       | 3.83  |

|          |               | Ablation<br>(N=1108) |       | Drug Therapy<br>(N=1096) |       |
|----------|---------------|----------------------|-------|--------------------------|-------|
|          | Withdrew      | 78                   | 7.04  | 116                      | 10.58 |
|          | End of Study  | 268                  | 24.19 | 259                      | 23.63 |
|          | Not Collected | 104                  | 9.39  | 96                       | 8.76  |
| 48 Month |               |                      |       |                          |       |
|          | Collected     | 534                  | 48.49 | 510                      | 46.53 |
|          | Died          | 39                   | 3.52  | 44                       | 4.01  |
|          | Withdrew      | 82                   | 7.40  | 123                      | 11.22 |
|          | End of Study  | 349                  | 31.50 | 328                      | 29.93 |
|          | Not Collected | 104                  | 9.39  | 91                       | 8.30  |
| 54 Month |               |                      |       |                          |       |
|          | Collected     | 450                  | 40.61 | 439                      | 40.05 |
|          | Died          | 46                   | 4.15  | 50                       | 4.56  |
|          | Withdrew      | 88                   | 7.94  | 130                      | 11.86 |
|          | End of Study  | 427                  | 38.54 | 396                      | 36.13 |
|          | Not Collected | 97                   | 8.75  | 81                       | 7.39  |
| 60 Month |               |                      |       |                          |       |
|          | Collected     | 373                  | 33.66 | 354                      | 32.30 |
|          | Died          | 52                   | 4.69  | 55                       | 5.02  |
|          | Withdrew      | 97                   | 8.75  | 135                      | 12.32 |
|          | End of Study  | 497                  | 44.86 | 471                      | 42.97 |
|          | Not Collected | 89                   | 8.03  | 81                       | 7.39  |

Shaded rows represent brief questionnaire intervals.

**eTable 2: AFEQT Symptoms, Daily Activities, and Treatment Concern Scores in the CABANA Trial**

|                                                     | <b>Catheter Ablation<br/>N=1108</b> | <b>Drug Therapy<br/>N=1096</b> | <b>Adjusted Difference<br/>Between Ablation and<br/>Drug Therapy<br/>(95% CI)</b> |
|-----------------------------------------------------|-------------------------------------|--------------------------------|-----------------------------------------------------------------------------------|
| <b>AFEQT</b>                                        |                                     |                                |                                                                                   |
| <b>Symptoms Score</b>                               |                                     |                                |                                                                                   |
| Scale: 0 = extremely limiting, 100 = no limitations |                                     |                                |                                                                                   |
| Baseline                                            |                                     |                                |                                                                                   |
| Number of patients contributing                     | 1072                                | 1070                           |                                                                                   |
| Median (25th, 75th percentile)                      | 75 (58, 89)                         | 75 (58, 92)                    |                                                                                   |
| Mean (standard deviation)                           | 71.7 (22.0)                         | 71.8 (22.9)                    | -0.1 (-2.0 to 1.8)                                                                |
| 3 month                                             |                                     |                                |                                                                                   |
| Number of patients contributing                     | 966                                 | 979                            |                                                                                   |
| Median (25th, 75th percentile)                      | 92 (79, 100)                        | 88 (71, 100)                   |                                                                                   |
| Mean (standard deviation)                           | 86.5 (17.2)                         | 83.1 (19.3)                    | 3.4 (1.8 to 5.0)                                                                  |
| 12 month                                            |                                     |                                |                                                                                   |
| Number of patients contributing                     | 907                                 | 900                            |                                                                                   |
| Median (25th, 75th percentile)                      | 100 (88, 100)                       | 92 (75, 100)                   |                                                                                   |
| Mean (standard deviation)                           | 91.5 (14.8)                         | 86.1 (17.5)                    | 5.2 (3.8 to 6.7)                                                                  |
| 24 month                                            |                                     |                                |                                                                                   |
| Number of patients contributing                     | 839                                 | 774                            |                                                                                   |
| Median (25th, 75th percentile)                      | 100 (88, 100)                       | 100 (79, 100)                  |                                                                                   |
| Mean (standard deviation)                           | 91.8 (15.4)                         | 88.5 (17.1)                    | 2.9 (1.3 to 4.4)                                                                  |
| 36 month                                            |                                     |                                |                                                                                   |
| Number of patients contributing                     | 622                                 | 583                            |                                                                                   |
| Median (25th, 75th percentile)                      | 100 (92, 100)                       | 100 (83, 100)                  |                                                                                   |
| Mean (standard deviation)                           | 92.3 (14.1)                         | 89.2 (16.9)                    | 3.1 (1.4 to 4.7)                                                                  |
| 48 month                                            |                                     |                                |                                                                                   |
| Number of patients contributing                     | 477                                 | 466                            |                                                                                   |



|                                                    | <b>Catheter Ablation<br/>N=1108</b> | <b>Drug Therapy<br/>N=1096</b> | <b>Adjusted Difference<br/>Between Ablation and<br/>Drug Therapy<br/>(95% CI)</b> |
|----------------------------------------------------|-------------------------------------|--------------------------------|-----------------------------------------------------------------------------------|
| Median (25th, 75th percentile)                     | 100 (88, 100)                       | 100 (83, 100)                  |                                                                                   |
| Mean (standard deviation)                          | 91.6 (15.6)                         | 89.9 (16.6)                    | 1.7 (-0.3 to 3.6)                                                                 |
| <b>60 month</b>                                    |                                     |                                |                                                                                   |
| Number of patients contributing                    | 327                                 | 319                            |                                                                                   |
| Median (25th, 75th percentile)                     | 100 (92, 100)                       | 100 (83, 100)                  |                                                                                   |
| Mean (standard deviation)                          | 92.0 (16.1)                         | 89.6 (17.2)                    | 1.8 (-0.5 to 4.1)                                                                 |
| <b>All follow-up</b>                               |                                     |                                |                                                                                   |
| Total questionnaires collected                     | 4138                                | 4021                           |                                                                                   |
| Median (25th, 75th percentile)                     | 100 (88, 100)                       | 96 (79, 100)                   |                                                                                   |
| Mean (standard deviation)                          | 90.6 (15.8)                         | 87.0 (17.8)                    | 3.0 (1.9 to 4.1)                                                                  |
| <b>Daily Activities</b>                            |                                     |                                |                                                                                   |
| Scale: 0 = extremely limited, 100 = no limitations |                                     |                                |                                                                                   |
| <b>Baseline</b>                                    |                                     |                                |                                                                                   |
| Number of patients contributing                    | 1083                                | 1076                           |                                                                                   |
| Median (25th, 75th percentile)                     | 56 (35, 77)                         | 54 (33, 77)                    |                                                                                   |
| Mean (standard deviation)                          | 56.4 (26.8)                         | 55.6 (27.0)                    | 0.7 (-1.5 to 3.0)                                                                 |
| <b>3 month</b>                                     |                                     |                                |                                                                                   |
| Number of patients contributing                    | 961                                 | 974                            |                                                                                   |
| Median (25th, 75th percentile)                     | 83 (62, 100)                        | 77 (50, 98)                    |                                                                                   |
| Mean (standard deviation)                          | 76.0 (24.6)                         | 71.5 (26.9)                    | 4.2 (2.0 to 6.5)                                                                  |
| <b>12 month</b>                                    |                                     |                                |                                                                                   |
| Number of patients contributing                    | 906                                 | 894                            |                                                                                   |
| Median (25th, 75th percentile)                     | 94 (71, 100)                        | 83 (58, 100)                   |                                                                                   |
| Mean (standard deviation)                          | 82.8 (22.3)                         | 76.2 (24.7)                    | 6.2 (4.0 to 8.3)                                                                  |
| <b>24 month</b>                                    |                                     |                                |                                                                                   |
| Number of patients contributing                    | 842                                 | 791                            |                                                                                   |
| Median (25th, 75th percentile)                     | 92 (71, 100)                        | 85 (58, 100)                   |                                                                                   |
| Mean (standard deviation)                          | 82.3 (22.2)                         | 76.0 (26.0)                    | 5.5 (3.3 to 7.7)                                                                  |

|                                 | <b>Catheter Ablation<br/>N=1108</b> | <b>Drug Therapy<br/>N=1096</b> | <b>Adjusted Difference<br/>Between Ablation and<br/>Drug Therapy<br/>(95% CI)</b> |
|---------------------------------|-------------------------------------|--------------------------------|-----------------------------------------------------------------------------------|
| <b>36 month</b>                 |                                     |                                |                                                                                   |
| Number of patients contributing | 640                                 | 599                            |                                                                                   |
| Median (25th, 75th percentile)  | 92 (67, 100)                        | 87 (63, 100)                   |                                                                                   |
| Mean (standard deviation)       | 81.2 (22.8)                         | 78.5 (23.7)                    | 2.7 (0.4 to 5.1)                                                                  |
| <b>48 month</b>                 |                                     |                                |                                                                                   |
| Number of patients contributing | 476                                 | 467                            |                                                                                   |
| Median (25th, 75th percentile)  | 90 (67, 100)                        | 83 (60, 100)                   |                                                                                   |
| Mean (standard deviation)       | 81.0 (22.1)                         | 77.2 (24.5)                    | 3.9 (1.3 to 6.6)                                                                  |
| <b>60 month</b>                 |                                     |                                |                                                                                   |
| Number of patients contributing | 326                                 | 317                            |                                                                                   |
| Median (25th, 75th percentile)  | 89 (69, 100)                        | 88 (60, 100)                   |                                                                                   |
| Mean (standard deviation)       | 80.8 (22.5)                         | 77.8 (25.1)                    | 2.2 (-1.0 to 5.4)                                                                 |
| <b>All follow-up</b>            |                                     |                                |                                                                                   |
| Total questionnaires collected  | 4151                                | 4042                           |                                                                                   |
| Median (25th, 75th percentile)  | 90 (67, 100)                        | 83 (58, 100)                   |                                                                                   |
| Mean (standard deviation)       | 80.5 (23.1)                         | 75.6 (25.5)                    | 4.1 (2.4 to 5.9)                                                                  |

### **Treatment Concern**

Scale: 0 = extremely limiting, 100 = no limitations

#### **Baseline**

|                                 |             |             |                    |
|---------------------------------|-------------|-------------|--------------------|
| Number of patients contributing | 1081        | 1076        |                    |
| Median (25th, 75th percentile)  | 69 (50, 83) | 69 (53, 86) |                    |
| Mean (standard deviation)       | 65.6 (23.2) | 67.1 (22.9) | -1.5 (-3.4 to 0.4) |
| <b>3 month</b>                  |             |             |                    |
| Number of patients contributing | 965         | 977         |                    |
| Median (25th, 75th percentile)  | 83 (69, 97) | 83 (67, 97) |                    |
| Mean (standard deviation)       | 80.1 (19.5) | 78.6 (21.1) | 1.2 (-0.5 to 3.0)  |
| <b>12 month</b>                 |             |             |                    |

|                                 | <b>Catheter Ablation<br/>N=1108</b> | <b>Drug Therapy<br/>N=1096</b> | <b>Adjusted Difference<br/>Between Ablation and<br/>Drug Therapy<br/>(95% CI)</b> |
|---------------------------------|-------------------------------------|--------------------------------|-----------------------------------------------------------------------------------|
| Number of patients contributing | 910                                 | 895                            |                                                                                   |
| Median (25th, 75th percentile)  | 94 (83, 100)                        | 89 (75, 100)                   |                                                                                   |
| Mean (standard deviation)       | 87.8 (16.6)                         | 83.5 (19.1)                    | 4.3 (2.7 to 5.9)                                                                  |
| <b>24 month</b>                 |                                     |                                |                                                                                   |
| Number of patients contributing | 852                                 | 792                            |                                                                                   |
| Median (25th, 75th percentile)  | 94 (83, 100)                        | 92 (78, 100)                   |                                                                                   |
| Mean (standard deviation)       | 88.9 (15.3)                         | 85.1 (18.7)                    | 3.4 (1.8 to 5.0)                                                                  |
| <b>36 month</b>                 |                                     |                                |                                                                                   |
| Number of patients contributing | 641                                 | 600                            |                                                                                   |
| Median (25th, 75th percentile)  | 94 (83, 100)                        | 94 (81, 100)                   |                                                                                   |
| Mean (standard deviation)       | 88.7 (15.4)                         | 87.2 (17.0)                    | 2.0 (0.3 to 3.7)                                                                  |
| <b>48 month</b>                 |                                     |                                |                                                                                   |
| Number of patients contributing | 471                                 | 468                            |                                                                                   |
| Median (25th, 75th percentile)  | 97 (83, 100)                        | 94 (81, 100)                   |                                                                                   |
| Mean (standard deviation)       | 89.6 (15.4)                         | 87.4 (17.0)                    | 2.3 (0.4 to 4.2)                                                                  |
| <b>60 month</b>                 |                                     |                                |                                                                                   |
| Number of patients contributing | 325                                 | 314                            |                                                                                   |
| Median (25th, 75th percentile)  | 97 (83, 100)                        | 94 (81, 100)                   |                                                                                   |
| Mean (standard deviation)       | 89.8 (15.3)                         | 86.4 (19.5)                    | 3.1 (0.8 to 5.5)                                                                  |
| <b>All follow-up</b>            |                                     |                                |                                                                                   |
| Total questionnaires collected  | 4164                                | 4046                           |                                                                                   |
| Median (25th, 75th percentile)  | 94 (78, 100)                        | 92 (75, 100)                   |                                                                                   |
| Mean (standard deviation)       | 86.8 (17.1)                         | 83.9 (19.3)                    | 2.7 (1.5 to 4.0)                                                                  |

**eTable 3: Duke Activity Status Scores in the CABANA Trial**

|                                                                            | Catheter Ablation<br>N=1108 | Drug Therapy<br>N=1096 | Adjusted Difference<br>Between Ablation and<br>Drug Therapy<br>(95% CI) |
|----------------------------------------------------------------------------|-----------------------------|------------------------|-------------------------------------------------------------------------|
| <b>Duke Activity Status Index (DASI)</b>                                   |                             |                        |                                                                         |
| Scale: 0 = worst physical functioning,<br>58.2 = best physical functioning |                             |                        |                                                                         |
| Baseline                                                                   |                             |                        |                                                                         |
| Number of patients contributing                                            | 1087                        | 1081                   |                                                                         |
| Median (25th, 75th percentile)                                             | 23 (13, 38)                 | 23 (11, 42)            |                                                                         |
| Mean (standard deviation)                                                  | 26.1 (16.9)                 | 26.2 (17.5)            | -0.1 (-1.6 to 1.3)                                                      |
| 3 month                                                                    |                             |                        |                                                                         |
| Number of patients contributing                                            | 974                         | 989                    |                                                                         |
| Median (25th, 75th percentile)                                             | 25 (13, 40)                 | 23 (13, 39)            |                                                                         |
| Mean (standard deviation)                                                  | 27.7 (16.2)                 | 26.6 (16.8)            | 1.0 (-0.4 to 2.5)                                                       |
| 12 month                                                                   |                             |                        |                                                                         |
| Number of patients contributing                                            | 925                         | 911                    |                                                                         |
| Median (25th, 75th percentile)                                             | 29 (15, 43)                 | 24 (13, 43)            |                                                                         |
| Mean (standard deviation)                                                  | 29.1 (16.5)                 | 27.3 (17.1)            | 1.8 (0.3 to 3.3)                                                        |
| 24 month                                                                   |                             |                        |                                                                         |
| Number of patients contributing                                            | 866                         | 806                    |                                                                         |
| Median (25th, 75th percentile)                                             | 27 (13, 43)                 | 25 (13, 42)            |                                                                         |
| Mean (standard deviation)                                                  | 28.6 (16.9)                 | 27.2 (17.0)            | 1.7 (0.2 to 3.2)                                                        |
| 36 month                                                                   |                             |                        |                                                                         |
| Number of patients contributing                                            | 652                         | 614                    |                                                                         |
| Median (25th, 75th percentile)                                             | 24 (13, 41)                 | 25 (13, 39)            |                                                                         |
| Mean (standard deviation)                                                  | 27.4 (16.5)                 | 26.8 (16.8)            | 1.2 (-0.4 to 2.8)                                                       |
| 48 month                                                                   |                             |                        |                                                                         |
| Number of patients contributing                                            | 482                         | 475                    |                                                                         |
| Median (25th, 75th percentile)                                             | 26 (13, 43)                 | 23 (13, 37)            |                                                                         |

|                                 | <b>Catheter Ablation<br/>N=1108</b> | <b>Drug Therapy<br/>N=1096</b> | <b>Adjusted Difference<br/>Between Ablation and<br/>Drug Therapy<br/>(95% CI)</b> |
|---------------------------------|-------------------------------------|--------------------------------|-----------------------------------------------------------------------------------|
| Mean (standard deviation)       | 28.0 (17.4)                         | 25.9 (16.5)                    | 2.2 (0.4 to 3.9)                                                                  |
| 60 month                        |                                     |                                |                                                                                   |
| Number of patients contributing | 328                                 | 318                            |                                                                                   |
| Median (25th, 75th percentile)  | 24 (11, 43)                         | 21 (10, 37)                    |                                                                                   |
| Mean (standard deviation)       | 27.7 (17.6)                         | 24.6 (17.3)                    | 2.4 (0.3 to 4.5)                                                                  |
| All follow-up                   |                                     |                                |                                                                                   |
| Total questionnaires collected  | 4227                                | 4113                           |                                                                                   |
| Median (25th, 75th percentile)  | 26 (13, 43)                         | 24 (13, 39)                    |                                                                                   |
| Mean (standard deviation)       | 28.2 (16.7)                         | 26.7 (16.9)                    | 1.7 (0.4 to 3.0)                                                                  |

**eTable 4: SF-36 Scores in the CABANA Trial**

|                                                              | Catheter Ablation<br>N=1108 | Drug Therapy<br>N=1096 | Adjusted Difference<br>Between Ablation and<br>Drug Therapy<br>(95% CI) |
|--------------------------------------------------------------|-----------------------------|------------------------|-------------------------------------------------------------------------|
| <b>SF-36 Scales</b>                                          |                             |                        |                                                                         |
| <b>General Health Scale</b>                                  |                             |                        |                                                                         |
| Scale: 0 to 100, higher scores indicate better health status |                             |                        |                                                                         |
| Baseline                                                     |                             |                        |                                                                         |
| Number of patients contributing                              | 1075                        | 1065                   |                                                                         |
| Median (25th, 75th percentile)                               | 60 (45, 77)                 | 57 (45, 72)            |                                                                         |
| Mean (standard deviation)                                    | 59.4 (20.1)                 | 58.1 (19.4)            | 1.3 (-0.3 to 3.0)                                                       |
| 3 month                                                      |                             |                        |                                                                         |
| Number of patients contributing                              | 963                         | 963                    |                                                                         |
| Median (25th, 75th percentile)                               | 62 (50, 80)                 | 62 (45, 77)            |                                                                         |
| Mean (standard deviation)                                    | 63.6 (19.6)                 | 59.4 (20.8)            | 3.8 (2.1 to 5.6)                                                        |
| 12 month                                                     |                             |                        |                                                                         |
| Number of patients contributing                              | 909                         | 889                    |                                                                         |
| Median (25th, 75th percentile)                               | 67 (52, 82)                 | 62 (45, 77)            |                                                                         |
| Mean (standard deviation)                                    | 65.9 (20.9)                 | 61.1 (20.8)            | 5.0 (3.1 to 6.8)                                                        |
| 24 month                                                     |                             |                        |                                                                         |
| Number of patients contributing                              | 847                         | 781                    |                                                                         |
| Median (25th, 75th percentile)                               | 67 (50, 82)                 | 62 (45, 77)            |                                                                         |
| Mean (standard deviation)                                    | 65.0 (21.0)                 | 60.2 (22.0)            | 4.9 (3.0 to 6.9)                                                        |
| 36 month                                                     |                             |                        |                                                                         |
| Number of patients contributing                              | 641                         | 605                    |                                                                         |
| Median (25th, 75th percentile)                               | 67 (50, 82)                 | 62 (45, 77)            |                                                                         |
| Mean (standard deviation)                                    | 63.9 (21.4)                 | 60.2 (21.9)            | 4.6 (2.4 to 6.7)                                                        |
| 48 month                                                     |                             |                        |                                                                         |
| Number of patients contributing                              | 469                         | 469                    |                                                                         |
| Median (25th, 75th percentile)                               | 67 (52, 80)                 | 62 (45, 77)            |                                                                         |

|                                                                     | <b>Catheter Ablation<br/>N=1108</b> | <b>Drug Therapy<br/>N=1096</b> | <b>Adjusted Difference<br/>Between Ablation and<br/>Drug Therapy<br/>(95% CI)</b> |
|---------------------------------------------------------------------|-------------------------------------|--------------------------------|-----------------------------------------------------------------------------------|
| Mean (standard deviation)                                           | 64.0 (21.4)                         | 61.1 (21.2)                    | 3.6 (1.3 to 5.9)                                                                  |
| <b>60 month</b>                                                     |                                     |                                |                                                                                   |
| Number of patients contributing                                     | 322                                 | 314                            |                                                                                   |
| Median (25th, 75th percentile)                                      | 62 (47, 82)                         | 62 (40, 77)                    |                                                                                   |
| Mean (standard deviation)                                           | 62.9 (21.5)                         | 58.4 (21.8)                    | 4.1 (1.5 to 6.8)                                                                  |
| <b>All follow-up</b>                                                |                                     |                                |                                                                                   |
| Total questionnaires collected                                      | 4151                                | 4021                           |                                                                                   |
| Median (25th, 75th percentile)                                      | 67 (50, 82)                         | 62 (45, 77)                    |                                                                                   |
| Mean (standard deviation)                                           | 64.4 (20.8)                         | 60.2 (21.3)                    | 4.3 (2.7 to 5.9)                                                                  |
| <b>SF-36 Mental Health Inventory (MHI-5)</b>                        |                                     |                                |                                                                                   |
| Scale: 0 to 100, higher scores indicate better mental health status |                                     |                                |                                                                                   |
| <b>Baseline</b>                                                     |                                     |                                |                                                                                   |
| Number of patients contributing                                     | 1078                                | 1071                           |                                                                                   |
| Median (25th, 75th percentile)                                      | 73 (55, 85)                         | 75 (55, 85)                    |                                                                                   |
| Mean (standard deviation)                                           | 69.6 (20.1)                         | 70.6 (19.3)                    | -0.9 (-2.6 to 0.7)                                                                |
| <b>3 month</b>                                                      |                                     |                                |                                                                                   |
| Number of patients contributing                                     | 968                                 | 973                            |                                                                                   |
| Median (25th, 75th percentile)                                      | 80 (70, 90)                         | 80 (65, 90)                    |                                                                                   |
| Mean (standard deviation)                                           | 77.3 (17.1)                         | 76.0 (18.0)                    | 0.9 (-0.6 to 2.4)                                                                 |
| <b>12 month</b>                                                     |                                     |                                |                                                                                   |
| Number of patients contributing                                     | 906                                 | 888                            |                                                                                   |
| Median (25th, 75th percentile)                                      | 85 (70, 90)                         | 80 (65, 90)                    |                                                                                   |
| Mean (standard deviation)                                           | 79.5 (17.6)                         | 77.0 (18.6)                    | 2.6 (1.0 to 4.3)                                                                  |
| <b>24 month</b>                                                     |                                     |                                |                                                                                   |
| Number of patients contributing                                     | 852                                 | 783                            |                                                                                   |
| Median (25th, 75th percentile)                                      | 85 (70, 90)                         | 85 (65, 90)                    |                                                                                   |
| Mean (standard deviation)                                           | 79.8 (16.6)                         | 77.4 (19.3)                    | 2.0 (0.4 to 3.7)                                                                  |
| <b>36 month</b>                                                     |                                     |                                |                                                                                   |

|                                 | <b>Catheter Ablation<br/>N=1108</b> | <b>Drug Therapy<br/>N=1096</b> | <b>Adjusted Difference<br/>Between Ablation and<br/>Drug Therapy<br/>(95% CI)</b> |
|---------------------------------|-------------------------------------|--------------------------------|-----------------------------------------------------------------------------------|
| Number of patients contributing | 638                                 | 608                            |                                                                                   |
| Median (25th, 75th percentile)  | 85 (70, 90)                         | 85 (65, 90)                    |                                                                                   |
| Mean (standard deviation)       | 79.5 (17.2)                         | 78.5 (18.3)                    | 1.8 (-0.0 to 3.5)                                                                 |
| <b>48 month</b>                 |                                     |                                |                                                                                   |
| Number of patients contributing | 471                                 | 466                            |                                                                                   |
| Median (25th, 75th percentile)  | 85 (70, 90)                         | 85 (70, 90)                    |                                                                                   |
| Mean (standard deviation)       | 80.4 (16.6)                         | 80.3 (17.4)                    | 1.6 (-0.3 to 3.5)                                                                 |
| <b>60 month</b>                 |                                     |                                |                                                                                   |
| Number of patients contributing | 324                                 | 317                            |                                                                                   |
| Median (25th, 75th percentile)  | 86 (75, 95)                         | 85 (70, 90)                    |                                                                                   |
| Mean (standard deviation)       | 80.8 (18.2)                         | 78.7 (19.7)                    | 2.5 (0.1 to 4.8)                                                                  |
| <b>All follow-up</b>            |                                     |                                |                                                                                   |
| Total questionnaires collected  | 4159                                | 4035                           |                                                                                   |
| Median (25th, 75th percentile)  | 85 (70, 90)                         | 85 (65, 90)                    |                                                                                   |
| Mean (standard deviation)       | 79.2 (17.2)                         | 77.6 (18.5)                    | 1.9 (0.5 to 3.3)                                                                  |

### **SF-36 Physical Functioning**

Scale: 0 to 100, higher scores indicate better physical functioning

#### **Baseline**

|                                 |             |             |                   |
|---------------------------------|-------------|-------------|-------------------|
| Number of patients contributing | 1080        | 1073        |                   |
| Median (25th, 75th percentile)  | 70 (45, 85) | 65 (40, 85) |                   |
| Mean (standard deviation)       | 63.8 (26.7) | 63.3 (26.0) | 0.6 (-1.6 to 2.8) |

#### **3 month**

|                                 |             |             |                  |
|---------------------------------|-------------|-------------|------------------|
| Number of patients contributing | 964         | 970         |                  |
| Median (25th, 75th percentile)  | 80 (55, 90) | 75 (50, 90) |                  |
| Mean (standard deviation)       | 70.9 (25.1) | 67.1 (26.2) | 3.3 (1.1 to 5.6) |

#### **12 month**

|                                 |     |     |  |
|---------------------------------|-----|-----|--|
| Number of patients contributing | 917 | 895 |  |
|---------------------------------|-----|-----|--|



|                                 | <b>Catheter Ablation<br/>N=1108</b> | <b>Drug Therapy<br/>N=1096</b> | <b>Adjusted Difference<br/>Between Ablation and<br/>Drug Therapy<br/>(95% CI)</b> |
|---------------------------------|-------------------------------------|--------------------------------|-----------------------------------------------------------------------------------|
| Median (25th, 75th percentile)  | 80 (60, 95)                         | 75 (50, 90)                    |                                                                                   |
| Mean (standard deviation)       | 73.2 (25.1)                         | 68.7 (25.8)                    | 4.5 (2.2 to 6.7)                                                                  |
| <b>24 month</b>                 |                                     |                                |                                                                                   |
| Number of patients contributing | 856                                 | 789                            |                                                                                   |
| Median (25th, 75th percentile)  | 80 (55, 94)                         | 75 (50, 90)                    |                                                                                   |
| Mean (standard deviation)       | 71.6 (25.5)                         | 69.2 (26.6)                    | 3.0 (0.6 to 5.4)                                                                  |
| <b>36 month</b>                 |                                     |                                |                                                                                   |
| Number of patients contributing | 646                                 | 605                            |                                                                                   |
| Median (25th, 75th percentile)  | 80 (55, 94)                         | 75 (50, 90)                    |                                                                                   |
| Mean (standard deviation)       | 71.3 (25.5)                         | 69.8 (26.0)                    | 2.3 (-0.3 to 4.8)                                                                 |
| <b>48 month</b>                 |                                     |                                |                                                                                   |
| Number of patients contributing | 477                                 | 475                            |                                                                                   |
| Median (25th, 75th percentile)  | 80 (50, 95)                         | 70 (45, 90)                    |                                                                                   |
| Mean (standard deviation)       | 70.9 (26.4)                         | 66.6 (26.8)                    | 4.2 (1.3 to 7.1)                                                                  |
| <b>60 month</b>                 |                                     |                                |                                                                                   |
| Number of patients contributing | 321                                 | 313                            |                                                                                   |
| Median (25th, 75th percentile)  | 75 (50, 94)                         | 70 (45, 90)                    |                                                                                   |
| Mean (standard deviation)       | 68.9 (27.4)                         | 66.6 (27.8)                    | 1.7 (-1.7 to 5.2)                                                                 |
| <b>All follow-up</b>            |                                     |                                |                                                                                   |
| Total questionnaires collected  | 4181                                | 4047                           |                                                                                   |
| Median (25th, 75th percentile)  | 80 (55, 94)                         | 75 (50, 90)                    |                                                                                   |
| Mean (standard deviation)       | 71.5 (25.6)                         | 68.2 (26.4)                    | 3.2 (1.1 to 5.2)                                                                  |

### **SF-36 Social Functioning**

Scale: 0 to 100, higher scores indicate better social functioning

#### **Baseline**

|                                 |              |              |                    |
|---------------------------------|--------------|--------------|--------------------|
| Number of patients contributing | 1085         | 1079         |                    |
| Median (25th, 75th percentile)  | 75 (50, 100) | 75 (50, 100) |                    |
| Mean (standard deviation)       | 70.7 (26.4)  | 71.7 (26.5)  | -0.9 (-3.2 to 1.3) |

|                                 | <b>Catheter Ablation<br/>N=1108</b> | <b>Drug Therapy<br/>N=1096</b> | <b>Adjusted Difference<br/>Between Ablation and<br/>Drug Therapy<br/>(95% CI)</b> |
|---------------------------------|-------------------------------------|--------------------------------|-----------------------------------------------------------------------------------|
| <b>3 month</b>                  |                                     |                                |                                                                                   |
| Number of patients contributing | 971                                 | 980                            |                                                                                   |
| Median (25th, 75th percentile)  | 100 (75, 100)                       | 88 (63, 100)                   |                                                                                   |
| Mean (standard deviation)       | 82.9 (22.4)                         | 80.8 (24.9)                    | 1.4 (-0.6 to 3.5)                                                                 |
| <b>12 month</b>                 |                                     |                                |                                                                                   |
| Number of patients contributing | 916                                 | 896                            |                                                                                   |
| Median (25th, 75th percentile)  | 100 (75, 100)                       | 100 (75, 100)                  |                                                                                   |
| Mean (standard deviation)       | 86.6 (21.6)                         | 83.0 (22.9)                    | 3.7 (1.6 to 5.7)                                                                  |
| <b>24 month</b>                 |                                     |                                |                                                                                   |
| Number of patients contributing | 862                                 | 792                            |                                                                                   |
| Median (25th, 75th percentile)  | 100 (75, 100)                       | 100 (75, 100)                  |                                                                                   |
| Mean (standard deviation)       | 85.5 (20.9)                         | 82.4 (24.1)                    | 2.9 (0.7 to 5.0)                                                                  |
| <b>36 month</b>                 |                                     |                                |                                                                                   |
| Number of patients contributing | 649                                 | 609                            |                                                                                   |
| Median (25th, 75th percentile)  | 100 (75, 100)                       | 100 (75, 100)                  |                                                                                   |
| Mean (standard deviation)       | 85.3 (21.3)                         | 84.2 (21.9)                    | 1.4 (-0.8 to 3.7)                                                                 |
| <b>48 month</b>                 |                                     |                                |                                                                                   |
| Number of patients contributing | 477                                 | 471                            |                                                                                   |
| Median (25th, 75th percentile)  | 100 (75, 100)                       | 100 (75, 100)                  |                                                                                   |
| Mean (standard deviation)       | 86.3 (20.5)                         | 83.3 (23.1)                    | 3.6 (1.0 to 6.2)                                                                  |
| <b>60 month</b>                 |                                     |                                |                                                                                   |
| Number of patients contributing | 326                                 | 317                            |                                                                                   |
| Median (25th, 75th percentile)  | 100 (75, 100)                       | 100 (75, 100)                  |                                                                                   |
| Mean (standard deviation)       | 85.4 (22.6)                         | 83.1 (24.3)                    | 1.9 (-1.3 to 5.1)                                                                 |
| <b>All follow-up</b>            |                                     |                                |                                                                                   |
| Total questionnaires collected  | 4201                                | 4065                           |                                                                                   |
| Median (25th, 75th percentile)  | 100 (75, 100)                       | 100 (75, 100)                  |                                                                                   |
| Mean (standard deviation)       | 85.2 (21.6)                         | 82.6 (23.6)                    | 2.5 (0.9 to 4.1)                                                                  |

### SF-36 Bodily Pain

|                                                   | <b>Catheter Ablation<br/>N=1108</b> | <b>Drug Therapy<br/>N=1096</b> | <b>Adjusted Difference<br/>Between Ablation and<br/>Drug Therapy<br/>(95% CI)</b> |
|---------------------------------------------------|-------------------------------------|--------------------------------|-----------------------------------------------------------------------------------|
| Scale: 0 to 100, higher scores indicate less pain |                                     |                                |                                                                                   |
| Baseline                                          |                                     |                                |                                                                                   |
| Number of patients contributing                   | 1078                                | 1076                           |                                                                                   |
| Median (25th, 75th percentile)                    | 72 (41, 100)                        | 74 (42, 100)                   |                                                                                   |
| Mean (standard deviation)                         | 68.7 (26.1)                         | 68.8 (26.7)                    | 0.0 (-2.2 to 2.2)                                                                 |
| 3 month                                           |                                     |                                |                                                                                   |
| Number of patients contributing                   | 970                                 | 979                            |                                                                                   |
| Median (25th, 75th percentile)                    | 74 (52, 100)                        | 74 (51, 100)                   |                                                                                   |
| Mean (standard deviation)                         | 73.4 (25.4)                         | 71.4 (26.4)                    | 1.7 (-0.6 to 4.0)                                                                 |
| 12 month                                          |                                     |                                |                                                                                   |
| Number of patients contributing                   | 912                                 | 891                            |                                                                                   |
| Median (25th, 75th percentile)                    | 74 (52, 100)                        | 74 (51, 100)                   |                                                                                   |
| Mean (standard deviation)                         | 74.4 (25.8)                         | 71.6 (26.4)                    | 2.9 (0.6 to 5.3)                                                                  |
| 24 month                                          |                                     |                                |                                                                                   |
| Number of patients contributing                   | 854                                 | 788                            |                                                                                   |
| Median (25th, 75th percentile)                    | 74 (52, 100)                        | 74 (51, 100)                   |                                                                                   |
| Mean (standard deviation)                         | 73.2 (25.8)                         | 70.9 (26.8)                    | 2.7 (0.2 to 5.1)                                                                  |
| 36 month                                          |                                     |                                |                                                                                   |
| Number of patients contributing                   | 645                                 | 608                            |                                                                                   |
| Median (25th, 75th percentile)                    | 74 (52, 100)                        | 74 (52, 100)                   |                                                                                   |
| Mean (standard deviation)                         | 72.4 (26.3)                         | 71.2 (26.0)                    | 1.9 (-0.7 to 4.6)                                                                 |
| 48 month                                          |                                     |                                |                                                                                   |
| Number of patients contributing                   | 475                                 | 466                            |                                                                                   |
| Median (25th, 75th percentile)                    | 74 (52, 100)                        | 74 (51, 100)                   |                                                                                   |
| Mean (standard deviation)                         | 72.1 (26.2)                         | 71.5 (25.5)                    | 1.3 (-1.6 to 4.2)                                                                 |
| 60 month                                          |                                     |                                |                                                                                   |
| Number of patients contributing                   | 326                                 | 317                            |                                                                                   |
| Median (25th, 75th percentile)                    | 74 (52, 100)                        | 72 (51, 100)                   |                                                                                   |
| Mean (standard deviation)                         | 71.9 (27.0)                         | 69.2 (27.1)                    | 1.9 (-1.8 to 5.5)                                                                 |

|                                                       | Catheter Ablation<br>N=1108 | Drug Therapy<br>N=1096 | Adjusted Difference<br>Between Ablation and<br>Drug Therapy<br>(95% CI) |
|-------------------------------------------------------|-----------------------------|------------------------|-------------------------------------------------------------------------|
| All follow-up                                         |                             |                        |                                                                         |
| Total questionnaires collected                        | 4182                        | 4049                   |                                                                         |
| Median (25th, 75th percentile)                        | 74 (52, 100)                | 74 (51, 100)           |                                                                         |
| Mean (standard deviation)                             | 73.2 (25.9)                 | 71.2 (26.3)            | 2.1 (0.2 to 4.0)                                                        |
| <b>SF-36 Vitality</b>                                 |                             |                        |                                                                         |
| Scale: 0 to 100, higher scores indicate more vitality |                             |                        |                                                                         |
| Baseline                                              |                             |                        |                                                                         |
| Number of patients contributing                       | 1078                        | 1071                   |                                                                         |
| Median (25th, 75th percentile)                        | 50 (38, 69)                 | 50 (38, 69)            |                                                                         |
| Mean (standard deviation)                             | 51.4 (22.3)                 | 51.3 (22.4)            | 0.1 (-1.7 to 2.0)                                                       |
| 3 month                                               |                             |                        |                                                                         |
| Number of patients contributing                       | 968                         | 973                    |                                                                         |
| Median (25th, 75th percentile)                        | 63 (50, 75)                 | 63 (44, 75)            |                                                                         |
| Mean (standard deviation)                             | 60.7 (21.1)                 | 58.4 (22.0)            | 2.0 (0.1 to 3.9)                                                        |
| 12 month                                              |                             |                        |                                                                         |
| Number of patients contributing                       | 906                         | 888                    |                                                                         |
| Median (25th, 75th percentile)                        | 69 (50, 81)                 | 63 (50, 75)            |                                                                         |
| Mean (standard deviation)                             | 64.4 (20.9)                 | 60.9 (21.3)            | 3.6 (1.7 to 5.5)                                                        |
| 24 month                                              |                             |                        |                                                                         |
| Number of patients contributing                       | 852                         | 784                    |                                                                         |
| Median (25th, 75th percentile)                        | 69 (50, 81)                 | 63 (50, 75)            |                                                                         |
| Mean (standard deviation)                             | 64.8 (20.1)                 | 60.0 (22.0)            | 4.7 (2.8 to 6.7)                                                        |
| 36 month                                              |                             |                        |                                                                         |
| Number of patients contributing                       | 636                         | 608                    |                                                                         |
| Median (25th, 75th percentile)                        | 63 (50, 75)                 | 63 (44, 75)            |                                                                         |
| Mean (standard deviation)                             | 63.0 (21.0)                 | 61.0 (22.3)            | 2.9 (0.7 to 5.1)                                                        |
| 48 month                                              |                             |                        |                                                                         |
| Number of patients contributing                       | 471                         | 466                    |                                                                         |

|                                                                                        | <b>Catheter Ablation<br/>N=1108</b> | <b>Drug Therapy<br/>N=1096</b> | <b>Adjusted Difference<br/>Between Ablation and<br/>Drug Therapy<br/>(95% CI)</b> |
|----------------------------------------------------------------------------------------|-------------------------------------|--------------------------------|-----------------------------------------------------------------------------------|
| Median (25th, 75th percentile)                                                         | 69 (50, 81)                         | 63 (50, 75)                    |                                                                                   |
| Mean (standard deviation)                                                              | 64.7 (20.5)                         | 60.1 (20.6)                    | 4.6 (2.4 to 6.9)                                                                  |
| <b>60 month</b>                                                                        |                                     |                                |                                                                                   |
| Number of patients contributing                                                        | 324                                 | 317                            |                                                                                   |
| Median (25th, 75th percentile)                                                         | 69 (50, 81)                         | 63 (44, 75)                    |                                                                                   |
| Mean (standard deviation)                                                              | 64.6 (21.0)                         | 60.4 (22.5)                    | 3.3 (0.5 to 6.2)                                                                  |
| <b>All follow-up</b>                                                                   |                                     |                                |                                                                                   |
| Total questionnaires collected                                                         | 4157                                | 4036                           |                                                                                   |
| Median (25th, 75th percentile)                                                         | 63 (50, 75)                         | 63 (44, 75)                    |                                                                                   |
| Mean (standard deviation)                                                              | 63.5 (20.8)                         | 60.0 (21.8)                    | 3.5 (2.0 to 5.1)                                                                  |
| <b>SF-36 Role Physical Scale</b>                                                       |                                     |                                |                                                                                   |
| Scale: 0 to 100, higher scores indicate fewer physical limitations on daily activities |                                     |                                |                                                                                   |
| <b>Baseline</b>                                                                        |                                     |                                |                                                                                   |
| Number of patients contributing                                                        | 1066                                | 1056                           |                                                                                   |
| Median (25th, 75th percentile)                                                         | 56 (38, 88)                         | 56 (31, 81)                    |                                                                                   |
| Mean (standard deviation)                                                              | 58.8 (29.6)                         | 57.8 (29.9)                    | 0.9 (-1.7 to 3.4)                                                                 |
| <b>3 month</b>                                                                         |                                     |                                |                                                                                   |
| Number of patients contributing                                                        | 964                                 | 963                            |                                                                                   |
| Median (25th, 75th percentile)                                                         | 75 (50, 100)                        | 75 (44, 100)                   |                                                                                   |
| Mean (standard deviation)                                                              | 72.0 (27.6)                         | 67.4 (30.3)                    | 4.0 (1.4 to 6.5)                                                                  |
| <b>12 month</b>                                                                        |                                     |                                |                                                                                   |
| Number of patients contributing                                                        | 901                                 | 880                            |                                                                                   |
| Median (25th, 75th percentile)                                                         | 88 (56, 100)                        | 75 (50, 100)                   |                                                                                   |
| Mean (standard deviation)                                                              | 76.7 (27.2)                         | 70.6 (29.1)                    | 5.8 (3.3 to 8.4)                                                                  |
| <b>24 month</b>                                                                        |                                     |                                |                                                                                   |
| Number of patients contributing                                                        | 850                                 | 785                            |                                                                                   |
| Median (25th, 75th percentile)                                                         | 81 (56, 100)                        | 75 (50, 100)                   |                                                                                   |
| Mean (standard deviation)                                                              | 74.9 (27.7)                         | 71.3 (29.2)                    | 3.6 (1.0 to 6.3)                                                                  |

|                                 | <b>Catheter Ablation<br/>N=1108</b> | <b>Drug Therapy<br/>N=1096</b> | <b>Adjusted Difference<br/>Between Ablation and<br/>Drug Therapy<br/>(95% CI)</b> |
|---------------------------------|-------------------------------------|--------------------------------|-----------------------------------------------------------------------------------|
| <b>36 month</b>                 |                                     |                                |                                                                                   |
| Number of patients contributing | 642                                 | 603                            |                                                                                   |
| Median (25th, 75th percentile)  | 81 (56, 100)                        | 75 (50, 100)                   |                                                                                   |
| Mean (standard deviation)       | 73.6 (28.3)                         | 70.8 (29.6)                    | 3.5 (0.5 to 6.5)                                                                  |
| <b>48 month</b>                 |                                     |                                |                                                                                   |
| Number of patients contributing | 471                                 | 464                            |                                                                                   |
| Median (25th, 75th percentile)  | 81 (56, 100)                        | 75 (50, 100)                   |                                                                                   |
| Mean (standard deviation)       | 74.6 (26.5)                         | 71.6 (28.3)                    | 3.5 (0.4 to 6.6)                                                                  |
| <b>60 month</b>                 |                                     |                                |                                                                                   |
| Number of patients contributing | 324                                 | 313                            |                                                                                   |
| Median (25th, 75th percentile)  | 88 (56, 100)                        | 75 (50, 100)                   |                                                                                   |
| Mean (standard deviation)       | 75.4 (26.9)                         | 69.9 (30.1)                    | 4.0 (0.1 to 7.8)                                                                  |
| <b>All follow-up</b>            |                                     |                                |                                                                                   |
| Total questionnaires collected  | 4152                                | 4008                           |                                                                                   |
| Median (25th, 75th percentile)  | 81 (56, 100)                        | 75 (50, 100)                   |                                                                                   |
| Mean (standard deviation)       | 74.4 (27.5)                         | 70.1 (29.5)                    | 4.1 (2.0 to 6.1)                                                                  |

### **SF-36 Role Emotional Scale**

Scale: 0 to 100, higher values indicate fewer emotional problems limiting daily activities

#### **Baseline**

|                                 |               |               |                    |
|---------------------------------|---------------|---------------|--------------------|
| Number of patients contributing | 1068          | 1063          |                    |
| Median (25th, 75th percentile)  | 75 (50, 100)  | 75 (50, 100)  |                    |
| Mean (standard deviation)       | 72.0 (28.4)   | 72.4 (29.3)   | -0.4 (-2.9 to 2.0) |
| <b>3 month</b>                  |               |               |                    |
| Number of patients contributing | 965           | 967           |                    |
| Median (25th, 75th percentile)  | 100 (75, 100) | 100 (67, 100) |                    |
| Mean (standard deviation)       | 85.3 (22.8)   | 82.4 (25.3)   | 2.4 (0.3 to 4.5)   |
| <b>12 month</b>                 |               |               |                    |
| Number of patients contributing | 897           | 883           |                    |

|                                 | <b>Catheter Ablation<br/>N=1108</b> | <b>Drug Therapy<br/>N=1096</b> | <b>Adjusted Difference<br/>Between Ablation and<br/>Drug Therapy<br/>(95% CI)</b> |
|---------------------------------|-------------------------------------|--------------------------------|-----------------------------------------------------------------------------------|
| Median (25th, 75th percentile)  | 100 (75, 100)                       | 100 (67, 100)                  |                                                                                   |
| Mean (standard deviation)       | 86.6 (23.0)                         | 83.7 (24.1)                    | 3.1 (0.9 to 5.2)                                                                  |
| <b>24 month</b>                 |                                     |                                |                                                                                   |
| Number of patients contributing | 846                                 | 781                            |                                                                                   |
| Median (25th, 75th percentile)  | 100 (75, 100)                       | 100 (75, 100)                  |                                                                                   |
| Mean (standard deviation)       | 86.1 (22.5)                         | 82.9 (24.5)                    | 2.8 (0.6 to 5.1)                                                                  |
| <b>36 month</b>                 |                                     |                                |                                                                                   |
| Number of patients contributing | 643                                 | 601                            |                                                                                   |
| Median (25th, 75th percentile)  | 100 (75, 100)                       | 100 (75, 100)                  |                                                                                   |
| Mean (standard deviation)       | 85.5 (22.9)                         | 85.1 (23.0)                    | 1.2 (-1.2 to 3.6)                                                                 |
| <b>48 month</b>                 |                                     |                                |                                                                                   |
| Number of patients contributing | 473                                 | 463                            |                                                                                   |
| Median (25th, 75th percentile)  | 100 (75, 100)                       | 100 (75, 100)                  |                                                                                   |
| Mean (standard deviation)       | 86.6 (21.1)                         | 85.3 (23.3)                    | 2.7 (0.1 to 5.2)                                                                  |
| <b>60 month</b>                 |                                     |                                |                                                                                   |
| Number of patients contributing | 324                                 | 313                            |                                                                                   |
| Median (25th, 75th percentile)  | 100 (75, 100)                       | 100 (75, 100)                  |                                                                                   |
| Mean (standard deviation)       | 85.7 (22.7)                         | 83.5 (25.2)                    | 1.9 (-1.4 to 5.3)                                                                 |
| <b>All follow-up</b>            |                                     |                                |                                                                                   |
| Total questionnaires collected  | 4148                                | 4008                           |                                                                                   |
| Median (25th, 75th percentile)  | 100 (75, 100)                       | 100 (75, 100)                  |                                                                                   |
| Mean (standard deviation)       | 85.9 (22.6)                         | 83.6 (24.3)                    | 2.4 (0.7 to 4.0)                                                                  |

**eTable 5: Toronto Atrial Fibrillation Severity Score (AFSS) in the CABANA Trial**

|                                               | Catheter Ablation<br>N=1108 | Drug Therapy<br>N=1096 | Adjusted Difference<br>Between Ablation and<br>Drug Therapy<br>(95% CI) |
|-----------------------------------------------|-----------------------------|------------------------|-------------------------------------------------------------------------|
| <b>AFSS</b>                                   |                             |                        |                                                                         |
| <b>Total AF Burden Score</b>                  |                             |                        |                                                                         |
| Scale: 3 = lowest burden, 40 = highest burden |                             |                        |                                                                         |
| Baseline                                      |                             |                        |                                                                         |
| Number of patients contributing               | 943                         | 952                    |                                                                         |
| Median (25th, 75th percentile)                | 20 (15, 23)                 | 20 (15, 23)            |                                                                         |
| Mean (standard deviation)                     | 19.3 (5.4)                  | 19.1 (5.4)             | 0.1 (-0.3 to 0.6)                                                       |
| 3 month                                       |                             |                        |                                                                         |
| Number of patients contributing               | 666                         | 711                    |                                                                         |
| Median (25th, 75th percentile)                | 15 (11, 20)                 | 16 (12, 21)            |                                                                         |
| Mean (standard deviation)                     | 15.2 (6.6)                  | 15.9 (6.3)             | -0.7 (-1.4 to -0.1)                                                     |
| 6 month                                       |                             |                        |                                                                         |
| Number of patients contributing               | 637                         | 732                    |                                                                         |
| Median (25th, 75th percentile)                | 13 (8, 18)                  | 15 (11, 19)            |                                                                         |
| Mean (standard deviation)                     | 13.1 (6.7)                  | 14.7 (6.4)             | -1.6 (-2.3 to -0.9)                                                     |
| 12 month                                      |                             |                        |                                                                         |
| Number of patients contributing               | 610                         | 649                    |                                                                         |
| Median (25th, 75th percentile)                | 11 (5, 16)                  | 14 (9, 18)             |                                                                         |
| Mean (standard deviation)                     | 11.0 (6.7)                  | 13.6 (6.3)             | -2.6 (-3.3 to -1.9)                                                     |
| 18 month                                      |                             |                        |                                                                         |
| Number of patients contributing               | 754                         | 703                    |                                                                         |
| Median (25th, 75th percentile)                | 3 (3, 11)                   | 11 (3, 16)             |                                                                         |
| Mean (standard deviation)                     | 7.2 (6.2)                   | 10.8 (7.4)             | -3.7 (-4.4 to -3.0)                                                     |
| 24 month                                      |                             |                        |                                                                         |
| Number of patients contributing               | 701                         | 633                    |                                                                         |
| Median (25th, 75th percentile)                | 3 (3, 12)                   | 9 (3, 17)              |                                                                         |
| Mean (standard deviation)                     | 7.6 (6.5)                   | 10.3 (7.5)             | -2.6 (-3.3 to -1.9)                                                     |



|                                 | <b>Catheter Ablation<br/>N=1108</b> | <b>Drug Therapy<br/>N=1096</b> | <b>Adjusted Difference<br/>Between Ablation and<br/>Drug Therapy<br/>(95% CI)</b> |
|---------------------------------|-------------------------------------|--------------------------------|-----------------------------------------------------------------------------------|
| <b>30 month</b>                 |                                     |                                |                                                                                   |
| Number of patients contributing | 634                                 | 591                            |                                                                                   |
| Median (25th, 75th percentile)  | 3 (3, 11)                           | 8 (3, 15)                      |                                                                                   |
| Mean (standard deviation)       | 7.5 (6.4)                           | 9.8 (7.5)                      | -2.3 (-3.0 to -1.5)                                                               |
| <b>36 month</b>                 |                                     |                                |                                                                                   |
| Number of patients contributing | 525                                 | 460                            |                                                                                   |
| Median (25th, 75th percentile)  | 3 (3, 12)                           | 9 (3, 16)                      |                                                                                   |
| Mean (standard deviation)       | 7.3 (6.2)                           | 10.4 (7.5)                     | -2.9 (-3.7 to -2.2)                                                               |
| <b>42 month</b>                 |                                     |                                |                                                                                   |
| Number of patients contributing | 509                                 | 456                            |                                                                                   |
| Median (25th, 75th percentile)  | 3 (3, 11)                           | 8 (3, 16)                      |                                                                                   |
| Mean (standard deviation)       | 7.2 (6.3)                           | 10.3 (7.8)                     | -3.0 (-3.8 to -2.2)                                                               |
| <b>48 month</b>                 |                                     |                                |                                                                                   |
| Number of patients contributing | 398                                 | 358                            |                                                                                   |
| Median (25th, 75th percentile)  | 3 (3, 11)                           | 5 (3, 16)                      |                                                                                   |
| Mean (standard deviation)       | 7.1 (6.1)                           | 9.7 (7.9)                      | -2.5 (-3.4 to -1.6)                                                               |
| <b>54 month</b>                 |                                     |                                |                                                                                   |
| Number of patients contributing | 348                                 | 326                            |                                                                                   |
| Median (25th, 75th percentile)  | 3 (3, 12)                           | 7 (3, 16)                      |                                                                                   |
| Mean (standard deviation)       | 7.8 (6.7)                           | 10.0 (8.0)                     | -2.6 (-3.6 to -1.6)                                                               |
| <b>60 month</b>                 |                                     |                                |                                                                                   |
| Number of patients contributing | 281                                 | 255                            |                                                                                   |
| Median (25th, 75th percentile)  | 3 (3, 11)                           | 6 (3, 15)                      |                                                                                   |
| Mean (standard deviation)       | 7.3 (6.5)                           | 9.5 (7.8)                      | -2.5 (-3.6 to -1.5)                                                               |
| <b>All follow-up</b>            |                                     |                                |                                                                                   |
| Total questionnaires collected  | 7006                                | 6826                           |                                                                                   |
| Median (25th, 75th percentile)  | 9 (3, 16)                           | 13 (4, 19)                     |                                                                                   |
| Mean (standard deviation)       | 10.6 (7.7)                          | 12.8 (7.7)                     | -2.5 (-2.9 to -2.0)                                                               |

### **AF Severity Score**

|                                                          | <b>Catheter Ablation<br/>N=1108</b> | <b>Drug Therapy<br/>N=1096</b> | <b>Adjusted Difference<br/>Between Ablation and<br/>Drug Therapy<br/>(95% CI)</b> |
|----------------------------------------------------------|-------------------------------------|--------------------------------|-----------------------------------------------------------------------------------|
| Scale: 0 = mild symptoms, 10 = extremely severe symptoms |                                     |                                |                                                                                   |
| Baseline                                                 |                                     |                                |                                                                                   |
| Number of patients contributing                          | 991                                 | 976                            |                                                                                   |
| Median (25th, 75th percentile)                           | 5 (3, 7)                            | 5 (3, 7)                       |                                                                                   |
| Mean (standard deviation)                                | 5.2 (2.5)                           | 5.1 (2.6)                      | 0.1 (-0.2 to 0.3)                                                                 |
| 3 month                                                  |                                     |                                |                                                                                   |
| Number of patients contributing                          | 722                                 | 775                            |                                                                                   |
| Median (25th, 75th percentile)                           | 5 (2, 6)                            | 5 (2, 7)                       |                                                                                   |
| Mean (standard deviation)                                | 4.5 (2.5)                           | 4.6 (2.6)                      | -0.1 (-0.3 to 0.2)                                                                |
| 6 month                                                  |                                     |                                |                                                                                   |
| Number of patients contributing                          | 709                                 | 799                            |                                                                                   |
| Median (25th, 75th percentile)                           | 4 (2, 6)                            | 5 (2, 7)                       |                                                                                   |
| Mean (standard deviation)                                | 4.2 (2.6)                           | 4.4 (2.5)                      | -0.2 (-0.5 to 0.0)                                                                |
| 12 month                                                 |                                     |                                |                                                                                   |
| Number of patients contributing                          | 668                                 | 698                            |                                                                                   |
| Median (25th, 75th percentile)                           | 3 (1, 6)                            | 4 (2, 6)                       |                                                                                   |
| Mean (standard deviation)                                | 3.6 (2.6)                           | 4.1 (2.5)                      | -0.4 (-0.7 to -0.2)                                                               |
| 18 month                                                 |                                     |                                |                                                                                   |
| Number of patients contributing                          | 774                                 | 737                            |                                                                                   |
| Median (25th, 75th percentile)                           | 1 (1, 4)                            | 3 (1, 5)                       |                                                                                   |
| Mean (standard deviation)                                | 2.4 (2.3)                           | 3.2 (2.4)                      | -0.7 (-1.0 to -0.5)                                                               |
| 24 month                                                 |                                     |                                |                                                                                   |
| Number of patients contributing                          | 731                                 | 662                            |                                                                                   |
| Median (25th, 75th percentile)                           | 1 (1, 4)                            | 2 (1, 5)                       |                                                                                   |
| Mean (standard deviation)                                | 2.5 (2.3)                           | 3.2 (2.5)                      | -0.6 (-0.8 to -0.3)                                                               |
| 30 month                                                 |                                     |                                |                                                                                   |
| Number of patients contributing                          | 660                                 | 611                            |                                                                                   |
| Median (25th, 75th percentile)                           | 1 (1, 4)                            | 2 (1, 5)                       |                                                                                   |
| Mean (standard deviation)                                | 2.6 (2.3)                           | 2.9 (2.4)                      | -0.3 (-0.6 to -0.1)                                                               |

|                                 | <b>Catheter Ablation<br/>N=1108</b> | <b>Drug Therapy<br/>N=1096</b> | <b>Adjusted Difference<br/>Between Ablation and<br/>Drug Therapy<br/>(95% CI)</b> |
|---------------------------------|-------------------------------------|--------------------------------|-----------------------------------------------------------------------------------|
| <b>36 month</b>                 |                                     |                                |                                                                                   |
| Number of patients contributing | 554                                 | 483                            |                                                                                   |
| Median (25th, 75th percentile)  | 1 (1, 4)                            | 2 (1, 5)                       |                                                                                   |
| Mean (standard deviation)       | 2.4 (2.2)                           | 3.1 (2.5)                      | -0.6 (-0.9 to -0.3)                                                               |
| <b>42 month</b>                 |                                     |                                |                                                                                   |
| Number of patients contributing | 525                                 | 471                            |                                                                                   |
| Median (25th, 75th percentile)  | 1 (1, 3)                            | 2 (1, 5)                       |                                                                                   |
| Mean (standard deviation)       | 2.3 (2.1)                           | 2.8 (2.3)                      | -0.5 (-0.7 to -0.2)                                                               |
| <b>48 month</b>                 |                                     |                                |                                                                                   |
| Number of patients contributing | 413                                 | 386                            |                                                                                   |
| Median (25th, 75th percentile)  | 1 (1, 3)                            | 1 (1, 5)                       |                                                                                   |
| Mean (standard deviation)       | 2.4 (2.2)                           | 2.8 (2.3)                      | -0.3 (-0.6 to -0.0)                                                               |
| <b>54 month</b>                 |                                     |                                |                                                                                   |
| Number of patients contributing | 361                                 | 336                            |                                                                                   |
| Median (25th, 75th percentile)  | 1 (1, 3)                            | 1 (1, 5)                       |                                                                                   |
| Mean (standard deviation)       | 2.4 (2.2)                           | 2.8 (2.4)                      | -0.4 (-0.7 to -0.1)                                                               |
| <b>60 month</b>                 |                                     |                                |                                                                                   |
| Number of patients contributing | 293                                 | 267                            |                                                                                   |
| Median (25th, 75th percentile)  | 1 (1, 3)                            | 1 (1, 5)                       |                                                                                   |
| Mean (standard deviation)       | 2.3 (2.1)                           | 2.9 (2.6)                      | -0.6 (-0.9 to -0.2)                                                               |
| <b>All follow-up</b>            |                                     |                                |                                                                                   |
| Total questionnaires collected  | 6410                                | 6225                           |                                                                                   |
| Median (25th, 75th percentile)  | 2 (1, 5)                            | 3 (1, 6)                       |                                                                                   |
| Mean (standard deviation)       | 3.0 (2.5)                           | 3.5 (2.6)                      | -0.4 (-0.6 to -0.3)                                                               |

**eTable 6: EQ-5D Scores in the CABANA Trial**

|                                                            | Catheter Ablation<br>N=1108 | Drug Therapy<br>N=1096 | Adjusted Difference<br>Between Ablation and<br>Drug Therapy<br>(95% CI) |
|------------------------------------------------------------|-----------------------------|------------------------|-------------------------------------------------------------------------|
| <b>EQ-5D</b>                                               |                             |                        |                                                                         |
| <b>Visual Analog Scale</b>                                 |                             |                        |                                                                         |
| 0-100 scale, 0=worst imaginable health, 100=perfect health |                             |                        |                                                                         |
| Baseline                                                   |                             |                        |                                                                         |
| Number of patients contributing                            | 1088                        | 1079                   |                                                                         |
| Median (25th, 75th percentile)                             | 70 (60, 80)                 | 70 (60, 80)            |                                                                         |
| Mean (standard deviation)                                  | 69.9 (17.5)                 | 69.4 (16.9)            | 0.6 (-0.9 to 2.0)                                                       |
| 3 month                                                    |                             |                        |                                                                         |
| Number of patients contributing                            | 943                         | 934                    |                                                                         |
| Median (25th, 75th percentile)                             | 80 (70, 87)                 | 75 (60, 85)            |                                                                         |
| Mean (standard deviation)                                  | 75.1 (16.1)                 | 72.5 (17.0)            | 2.5 (1.1 to 4.0)                                                        |
| 6 month                                                    |                             |                        |                                                                         |
| Number of patients contributing                            | 849                         | 843                    |                                                                         |
| Median (25th, 75th percentile)                             | 80 (70, 90)                 | 80 (65, 85)            |                                                                         |
| Mean (standard deviation)                                  | 76.7 (15.8)                 | 73.3 (17.5)            | 3.5 (2.0 to 5.1)                                                        |
| 12 month                                                   |                             |                        |                                                                         |
| Number of patients contributing                            | 884                         | 863                    |                                                                         |
| Median (25th, 75th percentile)                             | 80 (70, 90)                 | 75 (60, 85)            |                                                                         |
| Mean (standard deviation)                                  | 76.8 (16.6)                 | 72.4 (17.1)            | 4.4 (2.9 to 6.0)                                                        |
| 18 month                                                   |                             |                        |                                                                         |
| Number of patients contributing                            | 727                         | 686                    |                                                                         |
| Median (25th, 75th percentile)                             | 80 (70, 90)                 | 80 (65, 85)            |                                                                         |
| Mean (standard deviation)                                  | 77.6 (15.9)                 | 74.0 (16.8)            | 3.7 (2.1 to 5.3)                                                        |
| 24 month                                                   |                             |                        |                                                                         |
| Number of patients contributing                            | 802                         | 765                    |                                                                         |
| Median (25th, 75th percentile)                             | 80 (70, 90)                 | 75 (60, 85)            |                                                                         |
| Mean (standard deviation)                                  | 76.3 (16.3)                 | 73.3 (17.3)            | 2.8 (1.3 to 4.4)                                                        |

|                                 | <b>Catheter Ablation<br/>N=1108</b> | <b>Drug Therapy<br/>N=1096</b> | <b>Adjusted Difference<br/>Between Ablation and<br/>Drug Therapy<br/>(95% CI)</b> |
|---------------------------------|-------------------------------------|--------------------------------|-----------------------------------------------------------------------------------|
| <b>30 month</b>                 |                                     |                                |                                                                                   |
| Number of patients contributing | 550                                 | 526                            |                                                                                   |
| Median (25th, 75th percentile)  | 80 (70, 90)                         | 80 (65, 85)                    |                                                                                   |
| Mean (standard deviation)       | 76.9 (16.6)                         | 74.1 (17.4)                    | 2.9 (1.1 to 4.7)                                                                  |
| <b>36 month</b>                 |                                     |                                |                                                                                   |
| Number of patients contributing | 606                                 | 586                            |                                                                                   |
| Median (25th, 75th percentile)  | 80 (65, 90)                         | 80 (60, 85)                    |                                                                                   |
| Mean (standard deviation)       | 75.3 (17.7)                         | 73.7 (17.2)                    | 1.9 (0.1 to 3.7)                                                                  |
| <b>42 month</b>                 |                                     |                                |                                                                                   |
| Number of patients contributing | 405                                 | 394                            |                                                                                   |
| Median (25th, 75th percentile)  | 80 (70, 90)                         | 80 (69, 85)                    |                                                                                   |
| Mean (standard deviation)       | 75.8 (16.7)                         | 74.8 (16.8)                    | 2.4 (0.4 to 4.3)                                                                  |
| <b>48 month</b>                 |                                     |                                |                                                                                   |
| Number of patients contributing | 448                                 | 443                            |                                                                                   |
| Median (25th, 75th percentile)  | 80 (70, 89)                         | 80 (60, 85)                    |                                                                                   |
| Mean (standard deviation)       | 75.7 (15.8)                         | 73.5 (17.4)                    | 2.8 (1.0 to 4.7)                                                                  |
| <b>54 month</b>                 |                                     |                                |                                                                                   |
| Number of patients contributing | 293                                 | 282                            |                                                                                   |
| Median (25th, 75th percentile)  | 80 (70, 86)                         | 80 (70, 86)                    |                                                                                   |
| Mean (standard deviation)       | 76.5 (15.1)                         | 75.9 (16.3)                    | 2.1 (0.0 to 4.1)                                                                  |
| <b>60 month</b>                 |                                     |                                |                                                                                   |
| Number of patients contributing | 310                                 | 311                            |                                                                                   |
| Median (25th, 75th percentile)  | 80 (65, 90)                         | 75 (60, 85)                    |                                                                                   |
| Mean (standard deviation)       | 75.0 (16.3)                         | 73.2 (17.6)                    | 3.0 (0.8 to 5.1)                                                                  |
| <b>All follow-up</b>            |                                     |                                |                                                                                   |
| Total questionnaires collected  | 6817                                | 6633                           |                                                                                   |
| Median (25th, 75th percentile)  | 80 (70, 90)                         | 78 (63, 85)                    |                                                                                   |
| Mean (standard deviation)       | 76.2 (16.3)                         | 73.4 (17.2)                    | 2.9 (1.7 to 4.2)                                                                  |

### Health Status Index

|                                 | <b>Catheter Ablation<br/>N=1108</b> | <b>Drug Therapy<br/>N=1096</b> | <b>Adjusted Difference<br/>Between Ablation and<br/>Drug Therapy<br/>(95% CI)</b> |
|---------------------------------|-------------------------------------|--------------------------------|-----------------------------------------------------------------------------------|
| <b>Baseline</b>                 |                                     |                                |                                                                                   |
| Number of patients contributing | 1088                                | 1083                           |                                                                                   |
| Median (25th, 75th percentile)  | 0.827 (0.778, 1.000)                | 0.827 (0.778, 1.000)           |                                                                                   |
| Mean (standard deviation)       | 0.83 (0.15)                         | 0.84 (0.15)                    | -0.003 (-0.015 to 0.010)                                                          |
| <b>3 month</b>                  |                                     |                                |                                                                                   |
| Number of patients contributing | 945                                 | 938                            |                                                                                   |
| Median (25th, 75th percentile)  | 0.844 (0.810, 1.000)                | 0.844 (0.794, 1.000)           |                                                                                   |
| Mean (standard deviation)       | 0.88 (0.14)                         | 0.86 (0.14)                    | 0.019 (0.007 to 0.032)                                                            |
| <b>6 month</b>                  |                                     |                                |                                                                                   |
| Number of patients contributing | 850                                 | 844                            |                                                                                   |
| Median (25th, 75th percentile)  | 1.000 (0.827, 1.000)                | 0.844 (0.800, 1.000)           |                                                                                   |
| Mean (standard deviation)       | 0.89 (0.14)                         | 0.86 (0.15)                    | 0.030 (0.016 to 0.043)                                                            |
| <b>12 month</b>                 |                                     |                                |                                                                                   |
| Number of patients contributing | 884                                 | 867                            |                                                                                   |
| Median (25th, 75th percentile)  | 0.860 (0.810, 1.000)                | 0.844 (0.800, 1.000)           |                                                                                   |
| Mean (standard deviation)       | 0.88 (0.15)                         | 0.86 (0.15)                    | 0.026 (0.012 to 0.040)                                                            |
| <b>18 month</b>                 |                                     |                                |                                                                                   |
| Number of patients contributing | 727                                 | 688                            |                                                                                   |
| Median (25th, 75th percentile)  | 1.000 (0.827, 1.000)                | 0.844 (0.810, 1.000)           |                                                                                   |
| Mean (standard deviation)       | 0.90 (0.14)                         | 0.87 (0.15)                    | 0.032 (0.019 to 0.046)                                                            |
| <b>24 month</b>                 |                                     |                                |                                                                                   |
| Number of patients contributing | 804                                 | 767                            |                                                                                   |
| Median (25th, 75th percentile)  | 0.854 (0.810, 1.000)                | 0.844 (0.800, 1.000)           |                                                                                   |
| Mean (standard deviation)       | 0.88 (0.14)                         | 0.86 (0.16)                    | 0.022 (0.007 to 0.036)                                                            |
| <b>30 month</b>                 |                                     |                                |                                                                                   |
| Number of patients contributing | 551                                 | 527                            |                                                                                   |
| Median (25th, 75th percentile)  | 1.000 (0.810, 1.000)                | 0.860 (0.810, 1.000)           |                                                                                   |
| Mean (standard deviation)       | 0.88 (0.16)                         | 0.88 (0.15)                    | 0.012 (-0.004 to 0.029)                                                           |
| <b>36 month</b>                 |                                     |                                |                                                                                   |
| Number of patients contributing | 605                                 | 586                            |                                                                                   |

|                                 | <b>Catheter Ablation<br/>N=1108</b> | <b>Drug Therapy<br/>N=1096</b> | <b>Adjusted Difference<br/>Between Ablation and<br/>Drug Therapy<br/>(95% CI)</b> |
|---------------------------------|-------------------------------------|--------------------------------|-----------------------------------------------------------------------------------|
| Median (25th, 75th percentile)  | 0.860 (0.816, 1.000)                | 0.844 (0.794, 1.000)           |                                                                                   |
| Mean (standard deviation)       | 0.88 (0.15)                         | 0.86 (0.16)                    | 0.023 (0.007 to 0.040)                                                            |
| <b>42 month</b>                 |                                     |                                |                                                                                   |
| Number of patients contributing | 404                                 | 394                            |                                                                                   |
| Median (25th, 75th percentile)  | 1.000 (0.816, 1.000)                | 0.854 (0.810, 1.000)           |                                                                                   |
| Mean (standard deviation)       | 0.88 (0.15)                         | 0.87 (0.15)                    | 0.021 (0.003 to 0.038)                                                            |
| <b>48 month</b>                 |                                     |                                |                                                                                   |
| Number of patients contributing | 448                                 | 444                            |                                                                                   |
| Median (25th, 75th percentile)  | 0.844 (0.810, 1.000)                | 0.844 (0.800, 1.000)           |                                                                                   |
| Mean (standard deviation)       | 0.87 (0.15)                         | 0.87 (0.15)                    | 0.010 (-0.007 to 0.027)                                                           |
| <b>54 month</b>                 |                                     |                                |                                                                                   |
| Number of patients contributing | 294                                 | 282                            |                                                                                   |
| Median (25th, 75th percentile)  | 0.860 (0.810, 1.000)                | 0.857 (0.827, 1.000)           |                                                                                   |
| Mean (standard deviation)       | 0.88 (0.15)                         | 0.88 (0.14)                    | 0.015 (-0.005 to 0.035)                                                           |
| <b>60 month</b>                 |                                     |                                |                                                                                   |
| Number of patients contributing | 311                                 | 312                            |                                                                                   |
| Median (25th, 75th percentile)  | 0.854 (0.810, 1.000)                | 0.854 (0.810, 1.000)           |                                                                                   |
| Mean (standard deviation)       | 0.87 (0.16)                         | 0.87 (0.15)                    | 0.015 (-0.005 to 0.036)                                                           |
| <b>All follow-up</b>            |                                     |                                |                                                                                   |
| Total questionnaires collected  | 6823                                | 6649                           |                                                                                   |
| Median (25th, 75th percentile)  | 0.860 (0.814, 1.000)                | 0.844 (0.800, 1.000)           |                                                                                   |
| Mean (standard deviation)       | 0.88 (0.15)                         | 0.86 (0.15)                    | 0.020 (0.010 to 0.031)                                                            |

**eTable 7: Stanford Presenteeism Scale (SPS-6) Scores in the CABANA Trial**

|                                                          | Catheter Ablation<br>N=1108 | Drug Therapy<br>N=1096 | Adjusted Difference<br>Between Ablation and<br>Drug Therapy<br>(95% CI) |
|----------------------------------------------------------|-----------------------------|------------------------|-------------------------------------------------------------------------|
| <b>SPS-6</b>                                             |                             |                        |                                                                         |
| Scale: 6 to 30, lower scores indicate lower presenteeism |                             |                        |                                                                         |
| Baseline                                                 |                             |                        |                                                                         |
| Number of patients contributing                          | 379                         | 375                    |                                                                         |
| Median (25th, 75th percentile)                           | 21 (18, 26)                 | 21 (18, 26)            |                                                                         |
| Mean (standard deviation)                                | 21.4 (5.6)                  | 21.6 (5.7)             | -0.1 (-0.9 to 0.7)                                                      |
| 3 month                                                  |                             |                        |                                                                         |
| Number of patients contributing                          | 303                         | 337                    |                                                                         |
| Median (25th, 75th percentile)                           | 26 (20, 30)                 | 26 (20, 30)            |                                                                         |
| Mean (standard deviation)                                | 24.7 (5.5)                  | 24.9 (5.5)             | -0.3 (-1.1 to 0.5)                                                      |
| 6 month                                                  |                             |                        |                                                                         |
| Number of patients contributing                          | 300                         | 314                    |                                                                         |
| Median (25th, 75th percentile)                           | 29 (23, 30)                 | 28 (21, 30)            |                                                                         |
| Mean (standard deviation)                                | 26.0 (5.1)                  | 25.4 (5.2)             | 0.5 (-0.3 to 1.2)                                                       |
| 12 month                                                 |                             |                        |                                                                         |
| Number of patients contributing                          | 272                         | 280                    |                                                                         |
| Median (25th, 75th percentile)                           | 30 (22, 30)                 | 28 (22, 30)            |                                                                         |
| Mean (standard deviation)                                | 26.2 (4.9)                  | 25.8 (4.9)             | 0.4 (-0.4 to 1.2)                                                       |
| 18 month                                                 |                             |                        |                                                                         |
| Number of patients contributing                          | 250                         | 258                    |                                                                         |
| Median (25th, 75th percentile)                           | 29 (23, 30)                 | 30 (24, 30)            |                                                                         |
| Mean (standard deviation)                                | 26.0 (5.2)                  | 26.5 (4.7)             | -0.4 (-1.3 to 0.4)                                                      |
| 24 month                                                 |                             |                        |                                                                         |
| Number of patients contributing                          | 247                         | 246                    |                                                                         |
| Median (25th, 75th percentile)                           | 29 (21, 30)                 | 29 (21, 30)            |                                                                         |
| Mean (standard deviation)                                | 25.8 (5.3)                  | 25.8 (5.3)             | -0.2 (-1.1 to 0.7)                                                      |
| 30 month                                                 |                             |                        |                                                                         |



|                                 | <b>Catheter Ablation<br/>N=1108</b> | <b>Drug Therapy<br/>N=1096</b> | <b>Adjusted Difference<br/>Between Ablation and<br/>Drug Therapy<br/>(95% CI)</b> |
|---------------------------------|-------------------------------------|--------------------------------|-----------------------------------------------------------------------------------|
| Number of patients contributing | 208                                 | 209                            |                                                                                   |
| Median (25th, 75th percentile)  | 29 (24, 30)                         | 29 (22, 30)                    |                                                                                   |
| Mean (standard deviation)       | 26.3 (4.8)                          | 25.6 (5.6)                     | 0.3 (-0.6 to 1.3)                                                                 |
| <b>36 month</b>                 |                                     |                                |                                                                                   |
| Number of patients contributing | 174                                 | 168                            |                                                                                   |
| Median (25th, 75th percentile)  | 28 (22, 30)                         | 29 (22, 30)                    |                                                                                   |
| Mean (standard deviation)       | 25.9 (4.8)                          | 25.7 (5.4)                     | -0.0 (-1.0 to 1.0)                                                                |
| <b>42 month</b>                 |                                     |                                |                                                                                   |
| Number of patients contributing | 149                                 | 147                            |                                                                                   |
| Median (25th, 75th percentile)  | 28 (22, 30)                         | 29 (21, 30)                    |                                                                                   |
| Mean (standard deviation)       | 26.0 (4.8)                          | 25.8 (5.0)                     | 0.1 (-1.0 to 1.1)                                                                 |
| <b>48 month</b>                 |                                     |                                |                                                                                   |
| Number of patients contributing | 127                                 | 136                            |                                                                                   |
| Median (25th, 75th percentile)  | 29 (21, 30)                         | 29 (24, 30)                    |                                                                                   |
| Mean (standard deviation)       | 25.9 (5.0)                          | 26.4 (4.7)                     | -0.8 (-1.9 to 0.3)                                                                |
| <b>54 month</b>                 |                                     |                                |                                                                                   |
| Number of patients contributing | 104                                 | 86                             |                                                                                   |
| Median (25th, 75th percentile)  | 29 (22, 30)                         | 30 (24, 30)                    |                                                                                   |
| Mean (standard deviation)       | 26.1 (5.0)                          | 26.4 (5.1)                     | -0.0 (-1.4 to 1.3)                                                                |
| <b>60 month</b>                 |                                     |                                |                                                                                   |
| Number of patients contributing | 80                                  | 72                             |                                                                                   |
| Median (25th, 75th percentile)  | 30 (26, 30)                         | 30 (26, 30)                    |                                                                                   |
| Mean (standard deviation)       | 27.3 (4.4)                          | 27.1 (4.4)                     | -0.1 (-1.5 to 1.2)                                                                |
| <b>All follow-up</b>            |                                     |                                |                                                                                   |
| Total questionnaires collected  | 2214                                | 2253                           |                                                                                   |
| Median (25th, 75th percentile)  | 29 (22, 30)                         | 29 (22, 30)                    |                                                                                   |
| Mean (standard deviation)       | 25.9 (5.1)                          | 25.8 (5.2)                     | -0.1 (-0.6 to 0.4)                                                                |

**eTable 8: Work Productivity And Impairment (WPAI) Scores in the CABANA Trial**

|                                               | Catheter Ablation<br>N=1108 | Drug Therapy<br>N=1096 | Adjusted Difference<br>Between Ablation and<br>Drug Therapy<br>(95% CI) |
|-----------------------------------------------|-----------------------------|------------------------|-------------------------------------------------------------------------|
| <b>WPAI:General Health</b>                    |                             |                        |                                                                         |
| <b>Percent work time missed due to health</b> |                             |                        |                                                                         |
| Baseline                                      |                             |                        |                                                                         |
| Number of patients contributing               | 253                         | 253                    |                                                                         |
| Median (25th, 75th percentile)                | 0 (0, 21)                   | 0 (0, 22)              |                                                                         |
| Mean (standard deviation)                     | 18.1 (32.7)                 | 17.5 (32.0)            | 0.8 (-4.8 to 6.5)                                                       |
| 3 month                                       |                             |                        |                                                                         |
| Number of patients contributing               | 213                         | 223                    |                                                                         |
| Median (25th, 75th percentile)                | 0 (0, 0)                    | 0 (0, 0)               |                                                                         |
| Mean (standard deviation)                     | 11.0 (28.4)                 | 8.9 (24.5)             | 2.0 (-2.9 to 6.8)                                                       |
| 6 month                                       |                             |                        |                                                                         |
| Number of patients contributing               | 197                         | 222                    |                                                                         |
| Median (25th, 75th percentile)                | 0 (0, 0)                    | 0 (0, 0)               |                                                                         |
| Mean (standard deviation)                     | 6.0 (19.8)                  | 7.3 (23.2)             | -1.2 (-5.2 to 2.9)                                                      |
| 12 month                                      |                             |                        |                                                                         |
| Number of patients contributing               | 181                         | 198                    |                                                                         |
| Median (25th, 75th percentile)                | 0 (0, 0)                    | 0 (0, 0)               |                                                                         |
| Mean (standard deviation)                     | 4.8 (17.6)                  | 7.8 (23.2)             | -2.4 (-6.8 to 2.0)                                                      |
| 18 month                                      |                             |                        |                                                                         |
| Number of patients contributing               | 181                         | 178                    |                                                                         |
| Median (25th, 75th percentile)                | 0 (0, 0)                    | 0 (0, 0)               |                                                                         |
| Mean (standard deviation)                     | 3.6 (15.1)                  | 5.2 (20.8)             | -1.0 (-4.8 to 2.7)                                                      |
| 24 month                                      |                             |                        |                                                                         |
| Number of patients contributing               | 166                         | 173                    |                                                                         |
| Median (25th, 75th percentile)                | 0 (0, 0)                    | 0 (0, 0)               |                                                                         |
| Mean (standard deviation)                     | 4.5 (16.0)                  | 4.4 (17.0)             | 0.0 (-3.4 to 3.5)                                                       |

|                                 | <b>Catheter Ablation<br/>N=1108</b> | <b>Drug Therapy<br/>N=1096</b> | <b>Adjusted Difference<br/>Between Ablation and<br/>Drug Therapy<br/>(95% CI)</b> |
|---------------------------------|-------------------------------------|--------------------------------|-----------------------------------------------------------------------------------|
| <b>30 month</b>                 |                                     |                                |                                                                                   |
| Number of patients contributing | 144                                 | 145                            |                                                                                   |
| Median (25th, 75th percentile)  | 0 (0, 0)                            | 0 (0, 0)                       |                                                                                   |
| Mean (standard deviation)       | 3.3 (13.9)                          | 5.5 (20.0)                     | -2.9 (-6.8 to 1.1)                                                                |
| <b>36 month</b>                 |                                     |                                |                                                                                   |
| Number of patients contributing | 116                                 | 121                            |                                                                                   |
| Median (25th, 75th percentile)  | 0 (0, 0)                            | 0 (0, 0)                       |                                                                                   |
| Mean (standard deviation)       | 5.8 (21.9)                          | 5.6 (19.9)                     | -0.5 (-5.8 to 4.7)                                                                |
| <b>42 month</b>                 |                                     |                                |                                                                                   |
| Number of patients contributing | 118                                 | 99                             |                                                                                   |
| Median (25th, 75th percentile)  | 0 (0, 0)                            | 0 (0, 0)                       |                                                                                   |
| Mean (standard deviation)       | 2.2 (11.4)                          | 2.6 (12.6)                     | 0.0 (-3.3 to 3.4)                                                                 |
| <b>48 month</b>                 |                                     |                                |                                                                                   |
| Number of patients contributing | 90                                  | 86                             |                                                                                   |
| Median (25th, 75th percentile)  | 0 (0, 0)                            | 0 (0, 0)                       |                                                                                   |
| Mean (standard deviation)       | 6.0 (20.5)                          | 5.4 (18.1)                     | -0.8 (-6.7 to 5.0)                                                                |
| <b>54 month</b>                 |                                     |                                |                                                                                   |
| Number of patients contributing | 77                                  | 67                             |                                                                                   |
| Median (25th, 75th percentile)  | 0 (0, 0)                            | 0 (0, 0)                       |                                                                                   |
| Mean (standard deviation)       | 2.9 (16.1)                          | 2.4 (13.0)                     | 1.7 (-2.2 to 5.6)                                                                 |
| <b>60 month</b>                 |                                     |                                |                                                                                   |
| Number of patients contributing | 67                                  | 51                             |                                                                                   |
| Median (25th, 75th percentile)  | 0 (0, 0)                            | 0 (0, 0)                       |                                                                                   |
| Mean (standard deviation)       | 3.9 (17.7)                          | 6.3 (22.7)                     | -1.0 (-9.3 to 7.3)                                                                |
| <b>All follow-up</b>            |                                     |                                |                                                                                   |
| Number of patients contributing | 1550                                | 1563                           |                                                                                   |
| Median (25th, 75th percentile)  | 0 (0, 0)                            | 0 (0, 0)                       |                                                                                   |
| Mean (standard deviation)       | 5.3 (19.2)                          | 6.1 (20.8)                     | -0.6 (-2.2 to 1.1)                                                                |

|                                                       | Catheter Ablation<br>N=1108 | Drug Therapy<br>N=1096 | Adjusted Difference<br>Between Ablation and<br>Drug Therapy<br>(95% CI) |
|-------------------------------------------------------|-----------------------------|------------------------|-------------------------------------------------------------------------|
| <b>Percent impairment while working due to health</b> |                             |                        |                                                                         |
| Baseline                                              |                             |                        |                                                                         |
| Number of patients contributing                       | 316                         | 309                    |                                                                         |
| Median (25th, 75th percentile)                        | 10 (0, 40)                  | 10 (0, 40)             |                                                                         |
| Mean (standard deviation)                             | 21.7 (24.8)                 | 21.2 (23.3)            | 0.6 (-3.1 to 4.3)                                                       |
| 3 month                                               |                             |                        |                                                                         |
| Number of patients contributing                       | 309                         | 330                    |                                                                         |
| Median (25th, 75th percentile)                        | 0 (0, 20)                   | 0 (0, 20)              |                                                                         |
| Mean (standard deviation)                             | 11.8 (19.9)                 | 13.9 (21.6)            | -2.4 (-5.5 to 0.8)                                                      |
| 6 month                                               |                             |                        |                                                                         |
| Number of patients contributing                       | 301                         | 309                    |                                                                         |
| Median (25th, 75th percentile)                        | 0 (0, 10)                   | 0 (0, 20)              |                                                                         |
| Mean (standard deviation)                             | 9.1 (17.2)                  | 11.9 (19.0)            | -2.6 (-5.4 to 0.2)                                                      |
| 12 month                                              |                             |                        |                                                                         |
| Number of patients contributing                       | 308                         | 302                    |                                                                         |
| Median (25th, 75th percentile)                        | 0 (0, 10)                   | 0 (0, 20)              |                                                                         |
| Mean (standard deviation)                             | 7.1 (15.3)                  | 11.4 (19.6)            | -4.0 (-6.7 to -1.2)                                                     |
| 18 month                                              |                             |                        |                                                                         |
| Number of patients contributing                       | 268                         | 250                    |                                                                         |
| Median (25th, 75th percentile)                        | 0 (0, 10)                   | 0 (0, 10)              |                                                                         |
| Mean (standard deviation)                             | 7.5 (16.3)                  | 9.8 (18.6)             | -2.0 (-5.0 to 0.9)                                                      |
| 24 month                                              |                             |                        |                                                                         |
| Number of patients contributing                       | 283                         | 281                    |                                                                         |
| Median (25th, 75th percentile)                        | 0 (0, 10)                   | 0 (0, 20)              |                                                                         |
| Mean (standard deviation)                             | 9.8 (19.0)                  | 13.1 (22.6)            | -2.9 (-6.2 to 0.4)                                                      |
| 30 month                                              |                             |                        |                                                                         |
| Number of patients contributing                       | 215                         | 205                    |                                                                         |
| Median (25th, 75th percentile)                        | 0 (0, 10)                   | 0 (0, 10)              |                                                                         |
| Mean (standard deviation)                             | 10.0 (19.6)                 | 11.2 (21.2)            | -0.7 (-4.4 to 3.0)                                                      |

|                                 | Catheter Ablation<br>N=1108 | Drug Therapy<br>N=1096 | Adjusted Difference<br>Between Ablation and<br>Drug Therapy<br>(95% CI) |
|---------------------------------|-----------------------------|------------------------|-------------------------------------------------------------------------|
| <b>36 month</b>                 |                             |                        |                                                                         |
| Number of patients contributing | 206                         | 209                    |                                                                         |
| Median (25th, 75th percentile)  | 0 (0, 20)                   | 0 (0, 20)              |                                                                         |
| Mean (standard deviation)       | 10.0 (19.1)                 | 12.8 (21.6)            | -3.0 (-6.8 to 0.8)                                                      |
| <b>42 month</b>                 |                             |                        |                                                                         |
| Number of patients contributing | 160                         | 146                    |                                                                         |
| Median (25th, 75th percentile)  | 0 (0, 10)                   | 0 (0, 20)              |                                                                         |
| Mean (standard deviation)       | 8.6 (16.4)                  | 12.6 (22.6)            | -5.0 (-9.1 to -1.0)                                                     |
| <b>48 month</b>                 |                             |                        |                                                                         |
| Number of patients contributing | 159                         | 161                    |                                                                         |
| Median (25th, 75th percentile)  | 0 (0, 20)                   | 0 (0, 10)              |                                                                         |
| Mean (standard deviation)       | 13.0 (23.4)                 | 11.9 (21.5)            | 1.0 (-3.7 to 5.7)                                                       |
| <b>54 month</b>                 |                             |                        |                                                                         |
| Number of patients contributing | 102                         | 90                     |                                                                         |
| Median (25th, 75th percentile)  | 0 (0, 10)                   | 0 (0, 0)               |                                                                         |
| Mean (standard deviation)       | 5.9 (12.2)                  | 6.3 (16.7)             | -1.5 (-5.5 to 2.5)                                                      |
| <b>60 month</b>                 |                             |                        |                                                                         |
| Number of patients contributing | 111                         | 99                     |                                                                         |
| Median (25th, 75th percentile)  | 0 (0, 10)                   | 0 (0, 10)              |                                                                         |
| Mean (standard deviation)       | 7.8 (16.3)                  | 12.4 (23.4)            | -4.8 (-10.2 to 0.6)                                                     |
| <b>All follow-up</b>            |                             |                        |                                                                         |
| Number of patients contributing | 2422                        | 2382                   |                                                                         |
| Median (25th, 75th percentile)  | 0 (0, 10)                   | 0 (0, 20)              |                                                                         |
| Mean (standard deviation)       | 9.3 (18.1)                  | 11.9 (20.8)            | -2.5 (-4.4 to -0.6)                                                     |

**Percent overall work impairment due to health**

**Baseline**

|                                 |            |            |
|---------------------------------|------------|------------|
| Number of patients contributing | 227        | 228        |
| Median (25th, 75th percentile)  | 20 (0, 50) | 20 (0, 50) |

|                                 | <b>Catheter Ablation<br/>N=1108</b> | <b>Drug Therapy<br/>N=1096</b> | <b>Adjusted Difference<br/>Between Ablation and<br/>Drug Therapy<br/>(95% CI)</b> |
|---------------------------------|-------------------------------------|--------------------------------|-----------------------------------------------------------------------------------|
| Mean (standard deviation)       | 27.4 (29.5)                         | 27.4 (28.5)                    | 0.2 (-5.1 to 5.4)                                                                 |
| <b>3 month</b>                  |                                     |                                |                                                                                   |
| Number of patients contributing | 195                                 | 212                            |                                                                                   |
| Median (25th, 75th percentile)  | 0 (0, 20)                           | 0 (0, 30)                      |                                                                                   |
| Mean (standard deviation)       | 15.9 (24.4)                         | 17.2 (25.5)                    | -1.0 (-5.8 to 3.7)                                                                |
| <b>6 month</b>                  |                                     |                                |                                                                                   |
| Number of patients contributing | 192                                 | 210                            |                                                                                   |
| Median (25th, 75th percentile)  | 0 (0, 15)                           | 0 (0, 20)                      |                                                                                   |
| Mean (standard deviation)       | 11.8 (22.0)                         | 13.3 (20.2)                    | -1.1 (-5.0 to 2.9)                                                                |
| <b>12 month</b>                 |                                     |                                |                                                                                   |
| Number of patients contributing | 179                                 | 188                            |                                                                                   |
| Median (25th, 75th percentile)  | 0 (0, 10)                           | 0 (0, 20)                      |                                                                                   |
| Mean (standard deviation)       | 9.5 (19.9)                          | 14.4 (23.0)                    | -4.9 (-9.1 to -0.6)                                                               |
| <b>18 month</b>                 |                                     |                                |                                                                                   |
| Number of patients contributing | 177                                 | 169                            |                                                                                   |
| Median (25th, 75th percentile)  | 0 (0, 10)                           | 0 (0, 10)                      |                                                                                   |
| Mean (standard deviation)       | 8.8 (18.1)                          | 10.6 (19.8)                    | -0.8 (-4.7 to 3.2)                                                                |
| <b>24 month</b>                 |                                     |                                |                                                                                   |
| Number of patients contributing | 159                                 | 167                            |                                                                                   |
| Median (25th, 75th percentile)  | 0 (0, 20)                           | 0 (0, 30)                      |                                                                                   |
| Mean (standard deviation)       | 12.0 (20.5)                         | 15.5 (23.8)                    | -2.1 (-6.7 to 2.6)                                                                |
| <b>30 month</b>                 |                                     |                                |                                                                                   |
| Number of patients contributing | 139                                 | 139                            |                                                                                   |
| Median (25th, 75th percentile)  | 0 (0, 20)                           | 0 (0, 20)                      |                                                                                   |
| Mean (standard deviation)       | 14.0 (23.3)                         | 14.1 (23.6)                    | 0.5 (-4.6 to 5.6)                                                                 |
| <b>36 month</b>                 |                                     |                                |                                                                                   |
| Number of patients contributing | 108                                 | 115                            |                                                                                   |
| Median (25th, 75th percentile)  | 0 (0, 20)                           | 0 (0, 20)                      |                                                                                   |
| Mean (standard deviation)       | 11.5 (20.8)                         | 13.1 (22.2)                    | -1.4 (-6.8 to 4.0)                                                                |
| <b>42 month</b>                 |                                     |                                |                                                                                   |

|                                 | <b>Catheter Ablation<br/>N=1108</b> | <b>Drug Therapy<br/>N=1096</b> | <b>Adjusted Difference<br/>Between Ablation and<br/>Drug Therapy<br/>(95% CI)</b> |
|---------------------------------|-------------------------------------|--------------------------------|-----------------------------------------------------------------------------------|
| Number of patients contributing | 114                                 | 97                             |                                                                                   |
| Median (25th, 75th percentile)  | 0 (0, 20)                           | 0 (0, 20)                      |                                                                                   |
| Mean (standard deviation)       | 10.4 (18.8)                         | 15.4 (23.8)                    | -4.2 (-9.6 to 1.2)                                                                |
| <b>48 month</b>                 |                                     |                                |                                                                                   |
| Number of patients contributing | 88                                  | 83                             |                                                                                   |
| Median (25th, 75th percentile)  | 0 (0, 10)                           | 0 (0, 10)                      |                                                                                   |
| Mean (standard deviation)       | 13.0 (24.7)                         | 13.9 (25.8)                    | 0.7 (-6.7 to 8.0)                                                                 |
| <b>54 month</b>                 |                                     |                                |                                                                                   |
| Number of patients contributing | 74                                  | 66                             |                                                                                   |
| Median (25th, 75th percentile)  | 0 (0, 0)                            | 0 (0, 10)                      |                                                                                   |
| Mean (standard deviation)       | 5.3 (12.2)                          | 7.1 (15.3)                     | -2.3 (-6.7 to 2.1)                                                                |
| <b>60 month</b>                 |                                     |                                |                                                                                   |
| Number of patients contributing | 65                                  | 48                             |                                                                                   |
| Median (25th, 75th percentile)  | 0 (0, 10)                           | 0 (0, 15)                      |                                                                                   |
| Mean (standard deviation)       | 9.3 (18.6)                          | 13.5 (26.0)                    | -3.8 (-12.3 to 4.7)                                                               |
| <b>All follow-up</b>            |                                     |                                |                                                                                   |
| Number of patients contributing | 1490                                | 1494                           |                                                                                   |
| Median (25th, 75th percentile)  | 0 (0, 17)                           | 0 (0, 20)                      |                                                                                   |
| Mean (standard deviation)       | 11.4 (21.0)                         | 13.9 (22.8)                    | -1.9 (-4.3 to 0.6)                                                                |

**eTable 9: AFEQT Scores in the 6-Month Per Protocol Analysis in the CABANA Trial**

|                                                     | Catheter Ablation<br>N=969 | Drug Therapy<br>N=1096 | Adjusted Difference<br>Between Ablation and<br>Drug Therapy<br>(95% CI) |
|-----------------------------------------------------|----------------------------|------------------------|-------------------------------------------------------------------------|
| <b>AFEQT</b>                                        |                            |                        |                                                                         |
| <b>Summary Score</b>                                |                            |                        |                                                                         |
| Scale: 0 = complete disability, 100 = no disability |                            |                        |                                                                         |
| Baseline                                            |                            |                        |                                                                         |
| Number of patients contributing                     | 954                        | 1078                   |                                                                         |
| Median (25th, 75th percentile)                      | 63 (48, 79)                | 63 (48, 80)            |                                                                         |
| Mean (standard deviation)                           | 62.5 (20.4)                | 63.1 (20.6)            | -0.6 (-2.4 to 1.2)                                                      |
| 3 month                                             |                            |                        |                                                                         |
| Number of patients contributing                     | 886                        | 946                    |                                                                         |
| Median (25th, 75th percentile)                      | 86 (69, 95)                | 81 (63, 94)            |                                                                         |
| Mean (standard deviation)                           | 80.2 (18.7)                | 76.8 (20.1)            | 3.2 (1.5 to 5.0)                                                        |
| 12 month                                            |                            |                        |                                                                         |
| Number of patients contributing                     | 838                        | 774                    |                                                                         |
| Median (25th, 75th percentile)                      | 94 (81, 99)                | 86 (69, 96)            |                                                                         |
| Mean (standard deviation)                           | 87.0 (16.3)                | 80.5 (18.5)            | 6.8 (5.2 to 8.5)                                                        |
| 24 month                                            |                            |                        |                                                                         |
| Number of patients contributing                     | 791                        | 613                    |                                                                         |
| Median (25th, 75th percentile)                      | 94 (79, 99)                | 87 (71, 97)            |                                                                         |
| Mean (standard deviation)                           | 86.9 (16.0)                | 81.3 (18.9)            | 6.4 (4.6 to 8.1)                                                        |
| 36 month                                            |                            |                        |                                                                         |
| Number of patients contributing                     | 595                        | 430                    |                                                                         |
| Median (25th, 75th percentile)                      | 93 (79, 99)                | 89 (75, 96)            |                                                                         |
| Mean (standard deviation)                           | 86.4 (15.8)                | 83.3 (17.2)            | 5.0 (3.2 to 6.9)                                                        |
| 48 month                                            |                            |                        |                                                                         |
| Number of patients contributing                     | 440                        | 311                    |                                                                         |
| Median (25th, 75th percentile)                      | 92 (78, 99)                | 88 (74, 97)            |                                                                         |



|                                 | <b>Catheter Ablation<br/>N=969</b> | <b>Drug Therapy<br/>N=1096</b> | <b>Adjusted Difference<br/>Between Ablation and<br/>Drug Therapy<br/>(95% CI)</b> |
|---------------------------------|------------------------------------|--------------------------------|-----------------------------------------------------------------------------------|
| Mean (standard deviation)       | 86.1 (16.0)                        | 82.7 (17.6)                    | 5.4 (3.3 to 7.5)                                                                  |
| 60 month                        |                                    |                                |                                                                                   |
| Number of patients contributing | 306                                | 208                            |                                                                                   |
| Median (25th, 75th percentile)  | 93 (77, 100)                       | 88 (74, 96)                    |                                                                                   |
| Mean (standard deviation)       | 86.1 (16.2)                        | 81.9 (18.9)                    | 5.6 (3.0 to 8.1)                                                                  |
| All follow-up                   |                                    |                                |                                                                                   |
| Number of patients contributing | 3856                               | 3282                           |                                                                                   |
| Median (25th, 75th percentile)  | 92 (77, 99)                        | 86 (69, 96)                    |                                                                                   |
| Mean (standard deviation)       | 85.1 (16.9)                        | 80.2 (19.0)                    | 5.4 (4.0 to 6.8)                                                                  |

**eTable 10: AFEQT Scores in the 3-Month Per Protocol Analysis in the CABANA Trial**

|                                                     | Catheter Ablation<br>N=892 | Drug Therapy<br>N=1096 | Adjusted Difference<br>Between Ablation and<br>Drug Therapy<br>(95% CI) |
|-----------------------------------------------------|----------------------------|------------------------|-------------------------------------------------------------------------|
| <b>AFEQT</b>                                        |                            |                        |                                                                         |
| <b>Summary Score</b>                                |                            |                        |                                                                         |
| Scale: 0 = complete disability, 100 = no disability |                            |                        |                                                                         |
| Baseline                                            |                            |                        |                                                                         |
| Number of patients contributing                     | 877                        | 1078                   |                                                                         |
| Median (25th, 75th percentile)                      | 63 (48, 79)                | 63 (48, 80)            |                                                                         |
| Mean (standard deviation)                           | 62.3 (20.4)                | 63.1 (20.6)            | -0.7 (-2.5 to 1.1)                                                      |
| 3 month                                             |                            |                        |                                                                         |
| Number of patients contributing                     | 820                        | 946                    |                                                                         |
| Median (25th, 75th percentile)                      | 86 (71, 95)                | 81 (63, 94)            |                                                                         |
| Mean (standard deviation)                           | 80.7 (18.4)                | 76.8 (20.1)            | 3.8 (2.0 to 5.5)                                                        |
| 12 month                                            |                            |                        |                                                                         |
| Number of patients contributing                     | 780                        | 774                    |                                                                         |
| Median (25th, 75th percentile)                      | 94 (81, 99)                | 86 (69, 96)            |                                                                         |
| Mean (standard deviation)                           | 87.1 (16.4)                | 80.5 (18.5)            | 7.1 (5.4 to 8.8)                                                        |
| 24 month                                            |                            |                        |                                                                         |
| Number of patients contributing                     | 736                        | 613                    |                                                                         |
| Median (25th, 75th percentile)                      | 94 (79, 99)                | 87 (71, 97)            |                                                                         |
| Mean (standard deviation)                           | 86.9 (15.9)                | 81.3 (18.9)            | 6.5 (4.7 to 8.3)                                                        |
| 36 month                                            |                            |                        |                                                                         |
| Number of patients contributing                     | 554                        | 430                    |                                                                         |
| Median (25th, 75th percentile)                      | 93 (78, 99)                | 89 (75, 96)            |                                                                         |
| Mean (standard deviation)                           | 86.5 (15.8)                | 83.3 (17.2)            | 5.3 (3.4 to 7.1)                                                        |
| 48 month                                            |                            |                        |                                                                         |
| Number of patients contributing                     | 408                        | 311                    |                                                                         |
| Median (25th, 75th percentile)                      | 92 (78, 100)               | 88 (74, 97)            |                                                                         |

|                                 | <b>Catheter Ablation<br/>N=892</b> | <b>Drug Therapy<br/>N=1096</b> | <b>Adjusted Difference<br/>Between Ablation and<br/>Drug Therapy<br/>(95% CI)</b> |
|---------------------------------|------------------------------------|--------------------------------|-----------------------------------------------------------------------------------|
| Mean (standard deviation)       | 85.9 (16.3)                        | 82.7 (17.6)                    | 5.4 (3.3 to 7.5)                                                                  |
| 60 month                        |                                    |                                |                                                                                   |
| Number of patients contributing | 291                                | 208                            |                                                                                   |
| Median (25th, 75th percentile)  | 93 (77, 100)                       | 88 (74, 96)                    |                                                                                   |
| Mean (standard deviation)       | 86.4 (15.5)                        | 81.9 (18.9)                    | 5.7 (3.2 to 8.3)                                                                  |
| All follow-up                   |                                    |                                |                                                                                   |
| Number of patients contributing | 3589                               | 3282                           |                                                                                   |
| Median (25th, 75th percentile)  | 92 (77, 99)                        | 86 (69, 96)                    |                                                                                   |
| Mean (standard deviation)       | 85.3 (16.8)                        | 80.2 (19.0)                    | 5.6 (4.2 to 7.0)                                                                  |

**eTable 11: AFEQT Scores in the 12-Month Per Protocol Analysis in the CABANA Trial**

|                                                     | <b>Catheter Ablation<br/>N=987</b> | <b>Drug Therapy<br/>N=1096</b> | <b>Adjusted Difference<br/>Between Ablation and<br/>Drug Therapy<br/>(95% CI)</b> |
|-----------------------------------------------------|------------------------------------|--------------------------------|-----------------------------------------------------------------------------------|
| <b>AFEQT</b>                                        |                                    |                                |                                                                                   |
| <b>Summary Score</b>                                |                                    |                                |                                                                                   |
| Scale: 0 = complete disability, 100 = no disability |                                    |                                |                                                                                   |
| Baseline                                            |                                    |                                |                                                                                   |
| Number of patients contributing                     | 972                                | 1078                           |                                                                                   |
| Median (25th, 75th percentile)                      | 63 (48, 79)                        | 63 (48, 80)                    |                                                                                   |
| Mean (standard deviation)                           | 62.7 (20.5)                        | 63.1 (20.6)                    | -0.4 (-2.2 to 1.4)                                                                |
| 3 month                                             |                                    |                                |                                                                                   |
| Number of patients contributing                     | 903                                | 946                            |                                                                                   |
| Median (25th, 75th percentile)                      | 86 (69, 95)                        | 81 (63, 94)                    |                                                                                   |
| Mean (standard deviation)                           | 80.1 (18.6)                        | 76.8 (20.1)                    | 3.2 (1.4 to 4.9)                                                                  |
| 12 month                                            |                                    |                                |                                                                                   |
| Number of patients contributing                     | 853                                | 774                            |                                                                                   |
| Median (25th, 75th percentile)                      | 94 (81, 99)                        | 86 (69, 96)                    |                                                                                   |
| Mean (standard deviation)                           | 87.0 (16.2)                        | 80.5 (18.5)                    | 6.9 (5.2 to 8.5)                                                                  |
| 24 month                                            |                                    |                                |                                                                                   |
| Number of patients contributing                     | 806                                | 613                            |                                                                                   |
| Median (25th, 75th percentile)                      | 94 (79, 99)                        | 87 (71, 97)                    |                                                                                   |
| Mean (standard deviation)                           | 87.0 (15.9)                        | 81.3 (18.9)                    | 6.4 (4.7 to 8.2)                                                                  |
| 36 month                                            |                                    |                                |                                                                                   |
| Number of patients contributing                     | 607                                | 430                            |                                                                                   |
| Median (25th, 75th percentile)                      | 93 (79, 99)                        | 89 (75, 96)                    |                                                                                   |
| Mean (standard deviation)                           | 86.5 (15.7)                        | 83.3 (17.2)                    | 5.1 (3.2 to 6.9)                                                                  |
| 48 month                                            |                                    |                                |                                                                                   |
| Number of patients contributing                     | 450                                | 311                            |                                                                                   |
| Median (25th, 75th percentile)                      | 92 (78, 99)                        | 88 (74, 97)                    |                                                                                   |

|                                 | <b>Catheter Ablation<br/>N=987</b> | <b>Drug Therapy<br/>N=1096</b> | <b>Adjusted Difference<br/>Between Ablation and<br/>Drug Therapy<br/>(95% CI)</b> |
|---------------------------------|------------------------------------|--------------------------------|-----------------------------------------------------------------------------------|
| Mean (standard deviation)       | 86.2 (16.0)                        | 82.7 (17.6)                    | 5.5 (3.4 to 7.6)                                                                  |
| 60 month                        |                                    |                                |                                                                                   |
| Number of patients contributing | 313                                | 208                            |                                                                                   |
| Median (25th, 75th percentile)  | 93 (77, 100)                       | 88 (74, 96)                    |                                                                                   |
| Mean (standard deviation)       | 86.3 (16.1)                        | 81.9 (18.9)                    | 5.7 (3.2 to 8.3)                                                                  |
| All follow-up                   |                                    |                                |                                                                                   |
| Number of patients contributing | 3932                               | 3282                           |                                                                                   |
| Median (25th, 75th percentile)  | 92 (77, 99)                        | 86 (69, 96)                    |                                                                                   |
| Mean (standard deviation)       | 85.2 (16.9)                        | 80.2 (19.0)                    | 5.5 (4.1 to 6.9)                                                                  |

**eTable 12: MAFSI Scores in the 6-Month Per Protocol Analysis in the CABANA Trial**

|                                               | <b>Catheter Ablation<br/>N=969</b> | <b>Drug Therapy<br/>N=1096</b> | <b>Adjusted Difference<br/>Between Ablation and<br/>Drug Therapy<br/>(95% CI)</b> |
|-----------------------------------------------|------------------------------------|--------------------------------|-----------------------------------------------------------------------------------|
| <b>MAFSI</b>                                  |                                    |                                |                                                                                   |
| <b>Frequency Score</b>                        |                                    |                                |                                                                                   |
| Scale: 0 = no symptoms, 40 = maximum symptoms |                                    |                                |                                                                                   |
| Baseline                                      |                                    |                                |                                                                                   |
| Number of patients contributing               | 945                                | 1061                           |                                                                                   |
| Median (25th, 75th percentile)                | 11 (7, 16)                         | 11 (7, 16)                     |                                                                                   |
| Mean (standard deviation)                     | 11.9 (6.2)                         | 11.9 (6.4)                     | -0.1 (-0.6 to 0.5)                                                                |
| 3 month                                       |                                    |                                |                                                                                   |
| Number of patients contributing               | 830                                | 861                            |                                                                                   |
| Median (25th, 75th percentile)                | 6 (2, 11)                          | 8 (3, 13)                      |                                                                                   |
| Mean (standard deviation)                     | 7.3 (5.9)                          | 8.7 (6.4)                      | -1.6 (-2.1 to -1.0)                                                               |
| 12 month                                      |                                    |                                |                                                                                   |
| Number of patients contributing               | 763                                | 717                            |                                                                                   |
| Median (25th, 75th percentile)                | 5 (2, 10)                          | 7 (3, 12)                      |                                                                                   |
| Mean (standard deviation)                     | 6.3 (6.0)                          | 8.0 (6.2)                      | -1.9 (-2.5 to -1.3)                                                               |
| 24 month                                      |                                    |                                |                                                                                   |
| Number of patients contributing               | 700                                | 560                            |                                                                                   |
| Median (25th, 75th percentile)                | 5 (1, 10)                          | 7 (3, 12)                      |                                                                                   |
| Mean (standard deviation)                     | 6.2 (5.7)                          | 8.1 (6.5)                      | -2.1 (-2.8 to -1.5)                                                               |
| 36 month                                      |                                    |                                |                                                                                   |
| Number of patients contributing               | 525                                | 404                            |                                                                                   |
| Median (25th, 75th percentile)                | 5 (2, 10)                          | 6 (2, 12)                      |                                                                                   |
| Mean (standard deviation)                     | 6.5 (5.8)                          | 7.7 (6.4)                      | -1.8 (-2.5 to -1.1)                                                               |
| 48 month                                      |                                    |                                |                                                                                   |
| Number of patients contributing               | 392                                | 282                            |                                                                                   |
| Median (25th, 75th percentile)                | 5 (1, 10)                          | 6 (2, 11)                      |                                                                                   |
| Mean (standard deviation)                     | 6.5 (6.2)                          | 7.2 (6.2)                      | -1.4 (-2.2 to -0.6)                                                               |

|                                                 | Catheter Ablation<br>N=969 | Drug Therapy<br>N=1096 | Adjusted Difference<br>Between Ablation and<br>Drug Therapy<br>(95% CI) |
|-------------------------------------------------|----------------------------|------------------------|-------------------------------------------------------------------------|
| <b>60 month</b>                                 |                            |                        |                                                                         |
| Number of patients contributing                 | 264                        | 198                    |                                                                         |
| Median (25th, 75th percentile)                  | 4 (1, 9)                   | 6 (2, 10)              |                                                                         |
| Mean (standard deviation)                       | 5.7 (5.6)                  | 7.1 (6.4)              | -1.8 (-2.8 to -0.9)                                                     |
| <b>All follow-up</b>                            |                            |                        |                                                                         |
| Total questionnaires collected                  | 3474                       | 3022                   |                                                                         |
| Median (25th, 75th percentile)                  | 5 (2, 10)                  | 7 (3, 12)              |                                                                         |
| Mean (standard deviation)                       | 6.5 (5.9)                  | 8.1 (6.4)              | -1.8 (-2.3 to -1.3)                                                     |
| <b>Severity Score</b>                           |                            |                        |                                                                         |
| Scale: 0 = mild symptoms, 30 = extreme symptoms |                            |                        |                                                                         |
| <b>Baseline</b>                                 |                            |                        |                                                                         |
| Number of patients contributing                 | 943                        | 1056                   |                                                                         |
| Median (25th, 75th percentile)                  | 9 (6, 13)                  | 9 (5, 13)              |                                                                         |
| Mean (standard deviation)                       | 9.4 (5.0)                  | 9.3 (5.1)              | 0.0 (-0.4 to 0.5)                                                       |
| <b>3 month</b>                                  |                            |                        |                                                                         |
| Number of patients contributing                 | 826                        | 859                    |                                                                         |
| Median (25th, 75th percentile)                  | 5 (2, 9)                   | 6 (3, 11)              |                                                                         |
| Mean (standard deviation)                       | 5.8 (4.7)                  | 7.0 (5.2)              | -1.3 (-1.7 to -0.8)                                                     |
| <b>12 month</b>                                 |                            |                        |                                                                         |
| Number of patients contributing                 | 762                        | 717                    |                                                                         |
| Median (25th, 75th percentile)                  | 4 (1, 7)                   | 5 (2, 10)              |                                                                         |
| Mean (standard deviation)                       | 4.9 (4.7)                  | 6.5 (5.0)              | -1.6 (-2.0 to -1.1)                                                     |
| <b>24 month</b>                                 |                            |                        |                                                                         |
| Number of patients contributing                 | 698                        | 558                    |                                                                         |
| Median (25th, 75th percentile)                  | 4 (1, 8)                   | 5 (2, 9)               |                                                                         |
| Mean (standard deviation)                       | 4.9 (4.5)                  | 6.3 (5.1)              | -1.6 (-2.1 to -1.1)                                                     |
| <b>36 month</b>                                 |                            |                        |                                                                         |
| Number of patients contributing                 | 524                        | 404                    |                                                                         |

|                                 | <b>Catheter Ablation<br/>N=969</b> | <b>Drug Therapy<br/>N=1096</b> | <b>Adjusted Difference<br/>Between Ablation and<br/>Drug Therapy<br/>(95% CI)</b> |
|---------------------------------|------------------------------------|--------------------------------|-----------------------------------------------------------------------------------|
| Median (25th, 75th percentile)  | 4 (1, 8)                           | 5 (2, 9)                       |                                                                                   |
| Mean (standard deviation)       | 5.1 (4.5)                          | 6.0 (5.1)                      | -1.4 (-2.0 to -0.9)                                                               |
| <b>48 month</b>                 |                                    |                                |                                                                                   |
| Number of patients contributing | 391                                | 282                            |                                                                                   |
| Median (25th, 75th percentile)  | 4 (1, 8)                           | 5 (2, 9)                       |                                                                                   |
| Mean (standard deviation)       | 5.0 (4.7)                          | 5.6 (4.8)                      | -1.1 (-1.7 to -0.5)                                                               |
| <b>60 month</b>                 |                                    |                                |                                                                                   |
| Number of patients contributing | 264                                | 198                            |                                                                                   |
| Median (25th, 75th percentile)  | 3 (1, 7)                           | 4 (2, 9)                       |                                                                                   |
| Mean (standard deviation)       | 4.5 (4.6)                          | 5.7 (5.1)                      | -1.5 (-2.2 to -0.7)                                                               |
| <b>All follow-up</b>            |                                    |                                |                                                                                   |
| Total questionnaires collected  | 3465                               | 3018                           |                                                                                   |
| Median (25th, 75th percentile)  | 4 (1, 8)                           | 5 (2, 10)                      |                                                                                   |
| Mean (standard deviation)       | 5.1 (4.6)                          | 6.4 (5.1)                      | -1.4 (-1.8 to -1.0)                                                               |



**eTable 13: MAFSI Scores in the 3-Month Per Protocol Analysis in the CABANA Trial**

|                                               | Catheter Ablation<br>N=892 | Drug Therapy<br>N=1096 | Adjusted Difference<br>Between Ablation and<br>Drug Therapy<br>(95% CI) |
|-----------------------------------------------|----------------------------|------------------------|-------------------------------------------------------------------------|
| <b>MAFSI</b>                                  |                            |                        |                                                                         |
| <b>Frequency Score</b>                        |                            |                        |                                                                         |
| Scale: 0 = no symptoms, 40 = maximum symptoms |                            |                        |                                                                         |
| Baseline                                      |                            |                        |                                                                         |
| Number of patients contributing               | 870                        | 1061                   |                                                                         |
| Median (25th, 75th percentile)                | 11 (7, 16)                 | 11 (7, 16)             |                                                                         |
| Mean (standard deviation)                     | 11.8 (6.2)                 | 11.9 (6.4)             | -0.1 (-0.7 to 0.4)                                                      |
| 3 month                                       |                            |                        |                                                                         |
| Number of patients contributing               | 765                        | 861                    |                                                                         |
| Median (25th, 75th percentile)                | 6 (2, 11)                  | 8 (3, 13)              |                                                                         |
| Mean (standard deviation)                     | 6.9 (5.8)                  | 8.7 (6.4)              | -1.9 (-2.5 to -1.3)                                                     |
| 12 month                                      |                            |                        |                                                                         |
| Number of patients contributing               | 707                        | 717                    |                                                                         |
| Median (25th, 75th percentile)                | 5 (1, 10)                  | 7 (3, 12)              |                                                                         |
| Mean (standard deviation)                     | 6.3 (6.0)                  | 8.0 (6.2)              | -1.9 (-2.5 to -1.3)                                                     |
| 24 month                                      |                            |                        |                                                                         |
| Number of patients contributing               | 655                        | 560                    |                                                                         |
| Median (25th, 75th percentile)                | 5 (1, 10)                  | 7 (3, 12)              |                                                                         |
| Mean (standard deviation)                     | 6.2 (5.7)                  | 8.1 (6.5)              | -2.2 (-2.9 to -1.6)                                                     |
| 36 month                                      |                            |                        |                                                                         |
| Number of patients contributing               | 491                        | 404                    |                                                                         |
| Median (25th, 75th percentile)                | 5 (2, 10)                  | 6 (2, 12)              |                                                                         |
| Mean (standard deviation)                     | 6.3 (5.8)                  | 7.7 (6.4)              | -1.9 (-2.6 to -1.2)                                                     |
| 48 month                                      |                            |                        |                                                                         |
| Number of patients contributing               | 370                        | 282                    |                                                                         |
| Median (25th, 75th percentile)                | 5 (1, 10)                  | 6 (2, 11)              |                                                                         |
| Mean (standard deviation)                     | 6.5 (6.1)                  | 7.2 (6.2)              | -1.5 (-2.3 to -0.7)                                                     |

|                                                 | <b>Catheter Ablation<br/>N=892</b> | <b>Drug Therapy<br/>N=1096</b> | <b>Adjusted Difference<br/>Between Ablation and<br/>Drug Therapy<br/>(95% CI)</b> |
|-------------------------------------------------|------------------------------------|--------------------------------|-----------------------------------------------------------------------------------|
| <b>60 month</b>                                 |                                    |                                |                                                                                   |
| Number of patients contributing                 | 254                                | 198                            |                                                                                   |
| Median (25th, 75th percentile)                  | 4 (1, 9)                           | 6 (2, 10)                      |                                                                                   |
| Mean (standard deviation)                       | 5.6 (5.5)                          | 7.1 (6.4)                      | -2.0 (-2.9 to -1.0)                                                               |
| <b>All follow-up</b>                            |                                    |                                |                                                                                   |
| Total questionnaires collected                  | 3242                               | 3022                           |                                                                                   |
| Median (25th, 75th percentile)                  | 5 (2, 10)                          | 7 (3, 12)                      |                                                                                   |
| Mean (standard deviation)                       | 6.4 (5.9)                          | 8.1 (6.4)                      | -1.9 (-2.4 to -1.4)                                                               |
| <b>Severity Score</b>                           |                                    |                                |                                                                                   |
| Scale: 0 = mild symptoms, 30 = extreme symptoms |                                    |                                |                                                                                   |
| <b>Baseline</b>                                 |                                    |                                |                                                                                   |
| Number of patients contributing                 | 869                                | 1056                           |                                                                                   |
| Median (25th, 75th percentile)                  | 9 (6, 13)                          | 9 (5, 13)                      |                                                                                   |
| Mean (standard deviation)                       | 9.3 (5.0)                          | 9.3 (5.1)                      | -0.0 (-0.5 to 0.4)                                                                |
| <b>3 month</b>                                  |                                    |                                |                                                                                   |
| Number of patients contributing                 | 761                                | 859                            |                                                                                   |
| Median (25th, 75th percentile)                  | 5 (2, 8)                           | 6 (3, 11)                      |                                                                                   |
| Mean (standard deviation)                       | 5.5 (4.6)                          | 7.0 (5.2)                      | -1.5 (-2.0 to -1.1)                                                               |
| <b>12 month</b>                                 |                                    |                                |                                                                                   |
| Number of patients contributing                 | 707                                | 717                            |                                                                                   |
| Median (25th, 75th percentile)                  | 4 (1, 8)                           | 5 (2, 10)                      |                                                                                   |
| Mean (standard deviation)                       | 5.0 (4.8)                          | 6.5 (5.0)                      | -1.6 (-2.1 to -1.1)                                                               |
| <b>24 month</b>                                 |                                    |                                |                                                                                   |
| Number of patients contributing                 | 653                                | 558                            |                                                                                   |
| Median (25th, 75th percentile)                  | 4 (1, 8)                           | 5 (2, 9)                       |                                                                                   |
| Mean (standard deviation)                       | 4.8 (4.5)                          | 6.3 (5.1)                      | -1.7 (-2.2 to -1.2)                                                               |
| <b>36 month</b>                                 |                                    |                                |                                                                                   |
| Number of patients contributing                 | 490                                | 404                            |                                                                                   |

|                                 | <b>Catheter Ablation<br/>N=892</b> | <b>Drug Therapy<br/>N=1096</b> | <b>Adjusted Difference<br/>Between Ablation and<br/>Drug Therapy<br/>(95% CI)</b> |
|---------------------------------|------------------------------------|--------------------------------|-----------------------------------------------------------------------------------|
| Median (25th, 75th percentile)  | 4 (1, 8)                           | 5 (2, 9)                       |                                                                                   |
| Mean (standard deviation)       | 5.0 (4.5)                          | 6.0 (5.1)                      | -1.6 (-2.1 to -1.0)                                                               |
| <b>48 month</b>                 |                                    |                                |                                                                                   |
| Number of patients contributing | 369                                | 282                            |                                                                                   |
| Median (25th, 75th percentile)  | 4 (1, 8)                           | 5 (2, 9)                       |                                                                                   |
| Mean (standard deviation)       | 5.0 (4.7)                          | 5.6 (4.8)                      | -1.2 (-1.8 to -0.5)                                                               |
| <b>60 month</b>                 |                                    |                                |                                                                                   |
| Number of patients contributing | 254                                | 198                            |                                                                                   |
| Median (25th, 75th percentile)  | 3 (1, 6)                           | 4 (2, 9)                       |                                                                                   |
| Mean (standard deviation)       | 4.5 (4.4)                          | 5.7 (5.1)                      | -1.6 (-2.3 to -0.9)                                                               |
| <b>All follow-up</b>            |                                    |                                |                                                                                   |
| Total questionnaires collected  | 3234                               | 3018                           |                                                                                   |
| Median (25th, 75th percentile)  | 4 (1, 8)                           | 5 (2, 10)                      |                                                                                   |
| Mean (standard deviation)       | 5.0 (4.6)                          | 6.4 (5.1)                      | -1.5 (-1.9 to -1.1)                                                               |

**eTable 14: MAFSI Scores in the 12-Month Per Protocol Analysis in the CABANA Trial**

|                                               | Catheter Ablation<br>N=987 | Drug Therapy<br>N=1096 | Adjusted Difference<br>Between Ablation and<br>Drug Therapy<br>(95% CI) |
|-----------------------------------------------|----------------------------|------------------------|-------------------------------------------------------------------------|
| <b>MAFSI</b>                                  |                            |                        |                                                                         |
| <b>Frequency Score</b>                        |                            |                        |                                                                         |
| Scale: 0 = no symptoms, 40 = maximum symptoms |                            |                        |                                                                         |
| Baseline                                      |                            |                        |                                                                         |
| Number of patients contributing               | 962                        | 1061                   |                                                                         |
| Median (25th, 75th percentile)                | 11 (7, 16)                 | 11 (7, 16)             |                                                                         |
| Mean (standard deviation)                     | 11.9 (6.2)                 | 11.9 (6.4)             | -0.1 (-0.6 to 0.5)                                                      |
| 3 month                                       |                            |                        |                                                                         |
| Number of patients contributing               | 845                        | 861                    |                                                                         |
| Median (25th, 75th percentile)                | 6 (2, 11)                  | 8 (3, 13)              |                                                                         |
| Mean (standard deviation)                     | 7.3 (5.9)                  | 8.7 (6.4)              | -1.5 (-2.1 to -0.9)                                                     |
| 12 month                                      |                            |                        |                                                                         |
| Number of patients contributing               | 775                        | 717                    |                                                                         |
| Median (25th, 75th percentile)                | 5 (1, 10)                  | 7 (3, 12)              |                                                                         |
| Mean (standard deviation)                     | 6.3 (6.0)                  | 8.0 (6.2)              | -1.9 (-2.5 to -1.3)                                                     |
| 24 month                                      |                            |                        |                                                                         |
| Number of patients contributing               | 711                        | 560                    |                                                                         |
| Median (25th, 75th percentile)                | 5 (1, 10)                  | 7 (3, 12)              |                                                                         |
| Mean (standard deviation)                     | 6.2 (5.7)                  | 8.1 (6.5)              | -2.2 (-2.8 to -1.5)                                                     |
| 36 month                                      |                            |                        |                                                                         |
| Number of patients contributing               | 536                        | 404                    |                                                                         |
| Median (25th, 75th percentile)                | 5 (2, 10)                  | 6 (2, 12)              |                                                                         |
| Mean (standard deviation)                     | 6.4 (5.8)                  | 7.7 (6.4)              | -1.8 (-2.5 to -1.1)                                                     |
| 48 month                                      |                            |                        |                                                                         |
| Number of patients contributing               | 398                        | 282                    |                                                                         |
| Median (25th, 75th percentile)                | 5 (1, 10)                  | 6 (2, 11)              |                                                                         |
| Mean (standard deviation)                     | 6.5 (6.1)                  | 7.2 (6.2)              | -1.4 (-2.2 to -0.6)                                                     |

|                                                 | <b>Catheter Ablation<br/>N=987</b> | <b>Drug Therapy<br/>N=1096</b> | <b>Adjusted Difference<br/>Between Ablation and<br/>Drug Therapy<br/>(95% CI)</b> |
|-------------------------------------------------|------------------------------------|--------------------------------|-----------------------------------------------------------------------------------|
| <b>60 month</b>                                 |                                    |                                |                                                                                   |
| Number of patients contributing                 | 266                                | 198                            |                                                                                   |
| Median (25th, 75th percentile)                  | 4 (1, 9)                           | 6 (2, 10)                      |                                                                                   |
| Mean (standard deviation)                       | 5.7 (5.5)                          | 7.1 (6.4)                      | -1.8 (-2.8 to -0.9)                                                               |
| <b>All follow-up</b>                            |                                    |                                |                                                                                   |
| Total questionnaires collected                  | 3531                               | 3022                           |                                                                                   |
| Median (25th, 75th percentile)                  | 5 (2, 10)                          | 7 (3, 12)                      |                                                                                   |
| Mean (standard deviation)                       | 6.5 (5.9)                          | 8.1 (6.4)                      | -1.8 (-2.3 to -1.3)                                                               |
| <b>Severity Score</b>                           |                                    |                                |                                                                                   |
| Scale: 0 = mild symptoms, 30 = extreme symptoms |                                    |                                |                                                                                   |
| <b>Baseline</b>                                 |                                    |                                |                                                                                   |
| Number of patients contributing                 | 960                                | 1056                           |                                                                                   |
| Median (25th, 75th percentile)                  | 9 (6, 13)                          | 9 (5, 13)                      |                                                                                   |
| Mean (standard deviation)                       | 9.4 (5.0)                          | 9.3 (5.1)                      | 0.0 (-0.4 to 0.5)                                                                 |
| <b>3 month</b>                                  |                                    |                                |                                                                                   |
| Number of patients contributing                 | 841                                | 859                            |                                                                                   |
| Median (25th, 75th percentile)                  | 5 (2, 9)                           | 6 (3, 11)                      |                                                                                   |
| Mean (standard deviation)                       | 5.8 (4.7)                          | 7.0 (5.2)                      | -1.3 (-1.7 to -0.8)                                                               |
| <b>12 month</b>                                 |                                    |                                |                                                                                   |
| Number of patients contributing                 | 774                                | 717                            |                                                                                   |
| Median (25th, 75th percentile)                  | 4 (1, 7)                           | 5 (2, 10)                      |                                                                                   |
| Mean (standard deviation)                       | 4.9 (4.7)                          | 6.5 (5.0)                      | -1.6 (-2.1 to -1.1)                                                               |
| <b>24 month</b>                                 |                                    |                                |                                                                                   |
| Number of patients contributing                 | 709                                | 558                            |                                                                                   |
| Median (25th, 75th percentile)                  | 4 (1, 8)                           | 5 (2, 9)                       |                                                                                   |
| Mean (standard deviation)                       | 4.9 (4.5)                          | 6.3 (5.1)                      | -1.6 (-2.1 to -1.2)                                                               |
| <b>36 month</b>                                 |                                    |                                |                                                                                   |
| Number of patients contributing                 | 535                                | 404                            |                                                                                   |

|                                 | <b>Catheter Ablation<br/>N=987</b> | <b>Drug Therapy<br/>N=1096</b> | <b>Adjusted Difference<br/>Between Ablation and<br/>Drug Therapy<br/>(95% CI)</b> |
|---------------------------------|------------------------------------|--------------------------------|-----------------------------------------------------------------------------------|
| Median (25th, 75th percentile)  | 4 (1, 8)                           | 5 (2, 9)                       |                                                                                   |
| Mean (standard deviation)       | 5.0 (4.5)                          | 6.0 (5.1)                      | -1.4 (-2.0 to -0.9)                                                               |
| <b>48 month</b>                 |                                    |                                |                                                                                   |
| Number of patients contributing | 397                                | 282                            |                                                                                   |
| Median (25th, 75th percentile)  | 4 (1, 8)                           | 5 (2, 9)                       |                                                                                   |
| Mean (standard deviation)       | 5.0 (4.7)                          | 5.6 (4.8)                      | -1.1 (-1.7 to -0.5)                                                               |
| <b>60 month</b>                 |                                    |                                |                                                                                   |
| Number of patients contributing | 266                                | 198                            |                                                                                   |
| Median (25th, 75th percentile)  | 3 (1, 7)                           | 4 (2, 9)                       |                                                                                   |
| Mean (standard deviation)       | 4.6 (4.6)                          | 5.7 (5.1)                      | -1.5 (-2.2 to -0.7)                                                               |
| <b>All follow-up</b>            |                                    |                                |                                                                                   |
| Total questionnaires collected  | 3522                               | 3018                           |                                                                                   |
| Median (25th, 75th percentile)  | 4 (1, 8)                           | 5 (2, 10)                      |                                                                                   |
| Mean (standard deviation)       | 5.1 (4.6)                          | 6.4 (5.1)                      | -1.4 (-1.8 to -1.0)                                                               |

**eTable 15: AFEQT Scores with Adjustment for Site and the Site-Treatment Interaction as Random Effects**

|                                                     | Catheter Ablation<br>N=1108 | Drug Therapy<br>N=1096 | Adjusted Difference<br>Between Ablation and<br>Drug Therapy<br>(95% CI) |
|-----------------------------------------------------|-----------------------------|------------------------|-------------------------------------------------------------------------|
| <b>AFEQT</b>                                        |                             |                        |                                                                         |
| Summary Score                                       |                             |                        |                                                                         |
| Scale: 0 = complete disability, 100 = no disability |                             |                        |                                                                         |
| Baseline                                            |                             |                        |                                                                         |
| Number of patients contributing                     | 1084                        | 1078                   |                                                                         |
| Median (25th, 75th percentile)                      | 63 (48, 79)                 | 63 (48, 80)            |                                                                         |
| Mean (standard deviation)                           | 62.9 (20.5)                 | 63.1 (20.6)            | -0.2 (-1.9 to 1.5)                                                      |
| 3 month                                             |                             |                        |                                                                         |
| Number of patients contributing                     | 971                         | 983                    |                                                                         |
| Median (25th, 75th percentile)                      | 85 (69, 95)                 | 81 (63, 94)            |                                                                         |
| Mean (standard deviation)                           | 79.8 (18.6)                 | 76.5 (20.4)            | 3.0 (1.4 to 4.6)                                                        |
| 12 month                                            |                             |                        |                                                                         |
| Number of patients contributing                     | 915                         | 903                    |                                                                         |
| Median (25th, 75th percentile)                      | 94 (80, 99)                 | 86 (69, 96)            |                                                                         |
| Mean (standard deviation)                           | 86.4 (16.5)                 | 80.9 (18.5)            | 5.3 (3.8 to 6.8)                                                        |
| 24 month                                            |                             |                        |                                                                         |
| Number of patients contributing                     | 856                         | 798                    |                                                                         |
| Median (25th, 75th percentile)                      | 94 (78, 99)                 | 88 (71, 98)            |                                                                         |
| Mean (standard deviation)                           | 86.6 (16.2)                 | 81.8 (18.9)            | 4.3 (2.7 to 5.8)                                                        |
| 36 month                                            |                             |                        |                                                                         |
| Number of patients contributing                     | 645                         | 605                    |                                                                         |
| Median (25th, 75th percentile)                      | 93 (77, 99)                 | 90 (76, 98)            |                                                                         |
| Mean (standard deviation)                           | 86.1 (15.8)                 | 83.9 (17.3)            | 2.4 (0.8 to 4.0)                                                        |
| 48 month                                            |                             |                        |                                                                         |
| Number of patients contributing                     | 476                         | 473                    |                                                                         |
| Median (25th, 75th percentile)                      | 92 (78, 99)                 | 89 (74, 98)            |                                                                         |
| Mean (standard deviation)                           | 86.2 (15.9)                 | 83.5 (17.7)            | 2.9 (1.1 to 4.8)                                                        |
| 60 month                                            |                             |                        |                                                                         |

|                                 | Catheter Ablation<br>N=1108 | Drug Therapy<br>N=1096 | Adjusted Difference<br>Between Ablation and<br>Drug Therapy<br>(95% CI) |
|---------------------------------|-----------------------------|------------------------|-------------------------------------------------------------------------|
| Number of patients contributing | 329                         | 320                    |                                                                         |
| Median (25th, 75th percentile)  | 93 (77, 100)                | 90 (75, 98)            |                                                                         |
| Mean (standard deviation)       | 86.2 (16.2)                 | 83.3 (18.6)            | 2.5 (0.3 to 4.8)                                                        |
| All follow-up                   |                             |                        |                                                                         |
| Total questionnaires collected  | 4192                        | 4082                   |                                                                         |
| Median (25th, 75th percentile)  | 91 (76, 98)                 | 87 (70, 97)            |                                                                         |
| Mean (standard deviation)       | 84.8 (17.0)                 | 80.9 (19.0)            | 3.4 (2.2 to 4.6)                                                        |

## MAFSI

### Frequency Score

Scale: 0 = no atrial fibrillation, 40 = continuous atrial fibrillation

#### Baseline

|                                 |            |            |                    |
|---------------------------------|------------|------------|--------------------|
| Number of patients contributing | 1069       | 1061       |                    |
| Median (25th, 75th percentile)  | 11 (7, 16) | 11 (7, 16) |                    |
| Mean (standard deviation)       | 11.8 (6.2) | 11.9 (6.4) | -0.1 (-0.7 to 0.5) |

#### 3 month

|                                 |           |           |                     |
|---------------------------------|-----------|-----------|---------------------|
| Number of patients contributing | 897       | 894       |                     |
| Median (25th, 75th percentile)  | 6 (2, 11) | 8 (3, 13) |                     |
| Mean (standard deviation)       | 7.3 (5.9) | 8.9 (6.5) | -1.5 (-2.1 to -0.9) |

#### 12 month

|                                 |           |           |                     |
|---------------------------------|-----------|-----------|---------------------|
| Number of patients contributing | 828       | 831       |                     |
| Median (25th, 75th percentile)  | 5 (1, 10) | 7 (3, 12) |                     |
| Mean (standard deviation)       | 6.4 (6.0) | 8.1 (6.3) | -1.6 (-2.3 to -1.0) |

#### 24 month

|                                 |           |           |                     |
|---------------------------------|-----------|-----------|---------------------|
| Number of patients contributing | 759       | 724       |                     |
| Median (25th, 75th percentile)  | 5 (1, 10) | 7 (3, 12) |                     |
| Mean (standard deviation)       | 6.2 (5.7) | 8.0 (6.5) | -1.6 (-2.2 to -0.9) |

#### 36 month

|                                 |           |           |                     |
|---------------------------------|-----------|-----------|---------------------|
| Number of patients contributing | 571       | 559       |                     |
| Median (25th, 75th percentile)  | 5 (2, 10) | 6 (2, 12) |                     |
| Mean (standard deviation)       | 6.4 (5.9) | 7.5 (6.4) | -1.1 (-1.8 to -0.4) |



|                                 | Catheter Ablation<br>N=1108 | Drug Therapy<br>N=1096 | Adjusted Difference<br>Between Ablation and<br>Drug Therapy<br>(95% CI) |
|---------------------------------|-----------------------------|------------------------|-------------------------------------------------------------------------|
| 48 month                        |                             |                        |                                                                         |
| Number of patients contributing | 424                         | 419                    |                                                                         |
| Median (25th, 75th percentile)  | 5 (1, 10)                   | 6 (2, 11)              |                                                                         |
| Mean (standard deviation)       | 6.5 (6.1)                   | 7.1 (6.2)              | -0.7 (-1.5 to 0.1)                                                      |
| 60 month                        |                             |                        |                                                                         |
| Number of patients contributing | 279                         | 295                    |                                                                         |
| Median (25th, 75th percentile)  | 4 (1, 9)                    | 5 (2, 10)              |                                                                         |
| Mean (standard deviation)       | 5.8 (5.7)                   | 7.0 (6.3)              | -1.2 (-2.0 to -0.3)                                                     |
| All follow-up                   |                             |                        |                                                                         |
| Number of patients contributing | 3758                        | 3722                   |                                                                         |
| Median (25th, 75th percentile)  | 5 (2, 10)                   | 7 (3, 12)              |                                                                         |
| Mean (standard deviation)       | 6.5 (5.9)                   | 8.0 (6.4)              | -1.3 (-1.8 to -0.8)                                                     |

### Severity Score

Scale: 0 = mild symptoms, 30 = extreme symptoms

#### Baseline

|                                 |           |           |                     |
|---------------------------------|-----------|-----------|---------------------|
| Number of patients contributing | 1066      | 1056      |                     |
| Median (25th, 75th percentile)  | 9 (6, 13) | 9 (5, 13) |                     |
| Mean (standard deviation)       | 9.3 (4.9) | 9.3 (5.1) | -0.0 (-0.5 to 0.4)  |
| 3 month                         |           |           |                     |
| Number of patients contributing | 891       | 892       |                     |
| Median (25th, 75th percentile)  | 5 (2, 9)  | 6 (3, 11) |                     |
| Mean (standard deviation)       | 5.8 (4.7) | 7.0 (5.2) | -1.3 (-1.8 to -0.8) |
| 12 month                        |           |           |                     |
| Number of patients contributing | 827       | 830       |                     |
| Median (25th, 75th percentile)  | 4 (1, 8)  | 5 (2, 10) |                     |
| Mean (standard deviation)       | 5.0 (4.7) | 6.5 (5.1) | -1.5 (-2.0 to -1.0) |
| 24 month                        |           |           |                     |
| Number of patients contributing | 757       | 722       |                     |
| Median (25th, 75th percentile)  | 4 (1, 8)  | 5 (2, 9)  |                     |
| Mean (standard deviation)       | 4.9 (4.5) | 6.2 (5.1) | -1.2 (-1.7 to -0.7) |
| 36 month                        |           |           |                     |

|                                 | <b>Catheter Ablation<br/>N=1108</b> | <b>Drug Therapy<br/>N=1096</b> | <b>Adjusted Difference<br/>Between Ablation and<br/>Drug Therapy<br/>(95% CI)</b> |
|---------------------------------|-------------------------------------|--------------------------------|-----------------------------------------------------------------------------------|
| Number of patients contributing | 569                                 | 559                            |                                                                                   |
| Median (25th, 75th percentile)  | 4 (1, 8)                            | 5 (2, 9)                       |                                                                                   |
| Mean (standard deviation)       | 5.0 (4.5)                           | 5.8 (5.0)                      | -0.9 (-1.4 to -0.4)                                                               |
| <b>48 month</b>                 |                                     |                                |                                                                                   |
| Number of patients contributing | 423                                 | 419                            |                                                                                   |
| Median (25th, 75th percentile)  | 4 (1, 8)                            | 5 (2, 9)                       |                                                                                   |
| Mean (standard deviation)       | 5.0 (4.7)                           | 5.5 (4.8)                      | -0.7 (-1.2 to -0.1)                                                               |
| <b>60 month</b>                 |                                     |                                |                                                                                   |
| Number of patients contributing | 279                                 | 295                            |                                                                                   |
| Median (25th, 75th percentile)  | 3 (1, 7)                            | 4 (2, 8)                       |                                                                                   |
| Mean (standard deviation)       | 4.6 (4.7)                           | 5.6 (4.9)                      | -0.9 (-1.6 to -0.3)                                                               |
| <b>All follow-up</b>            |                                     |                                |                                                                                   |
| Number of patients contributing | 3746                                | 3717                           |                                                                                   |
| Median (25th, 75th percentile)  | 4 (1, 8)                            | 5 (2, 9)                       |                                                                                   |
| Mean (standard deviation)       | 5.1 (4.7)                           | 6.3 (5.1)                      | -1.1 (-1.5 to -0.7)                                                               |

**eFigure 2: AFEQT Summary Score in Pre-Specified Subgroups in the CABANA Trial by Intention-to-Treat**

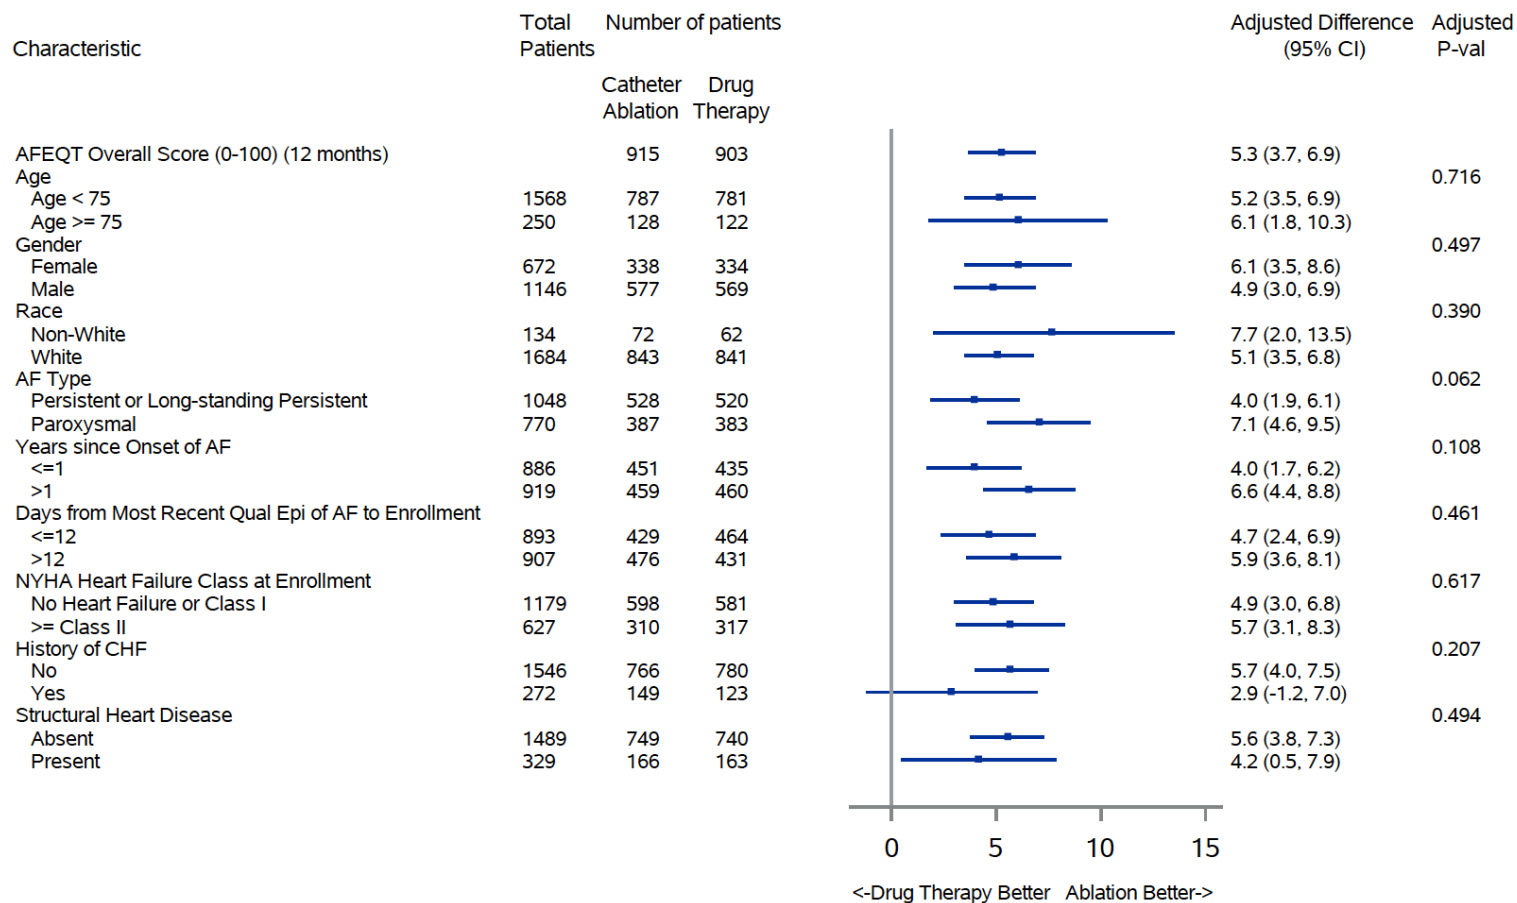

**eFigure 2 (continued): AFEQT Summary Score in Pre-Specified Subgroups in the CABANA Trial by Intention-to-Treat**

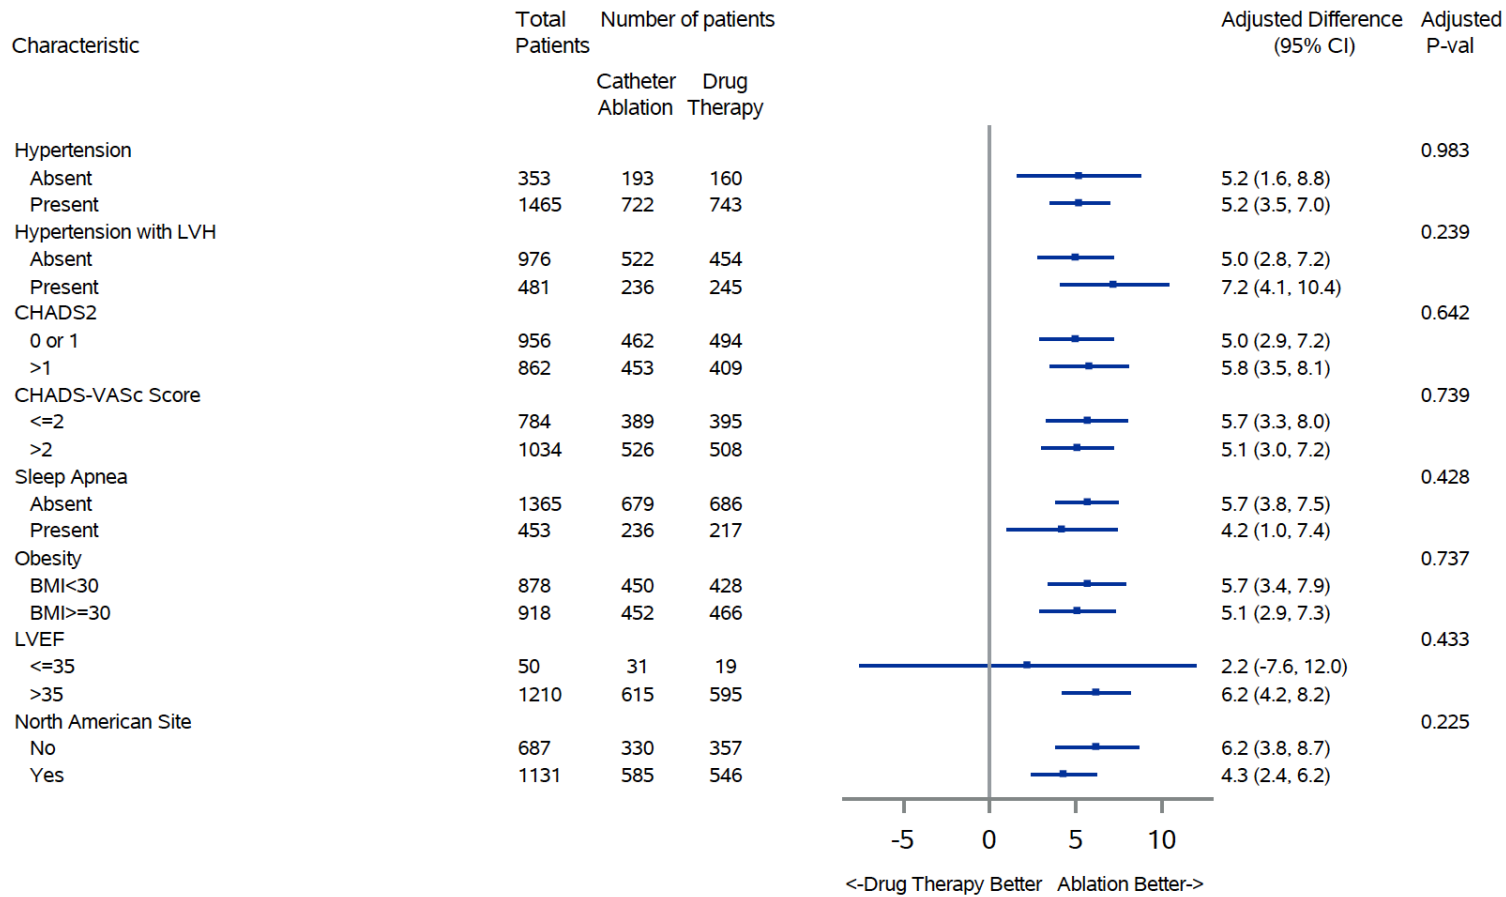

**eFigure 3: MAFSI Frequency Score in Pre-Specified Subgroups in the CABANA Trial by Intention-to-Treat**

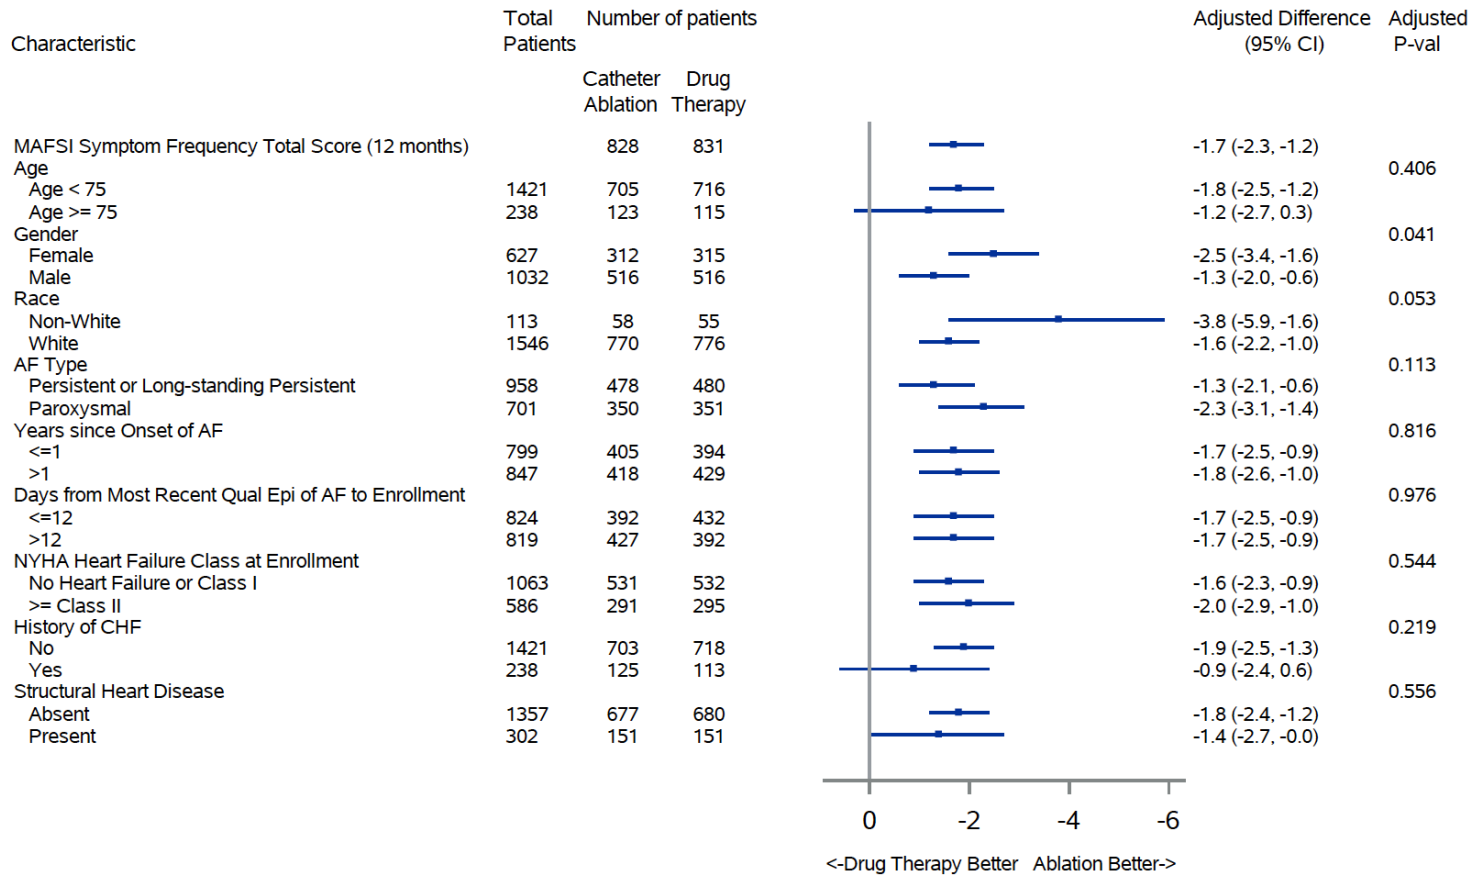

**eFigure 3 (continued): MAFSI Frequency Score in Pre-Specified Subgroups in the CABANA Trial by Intention-to-Treat**

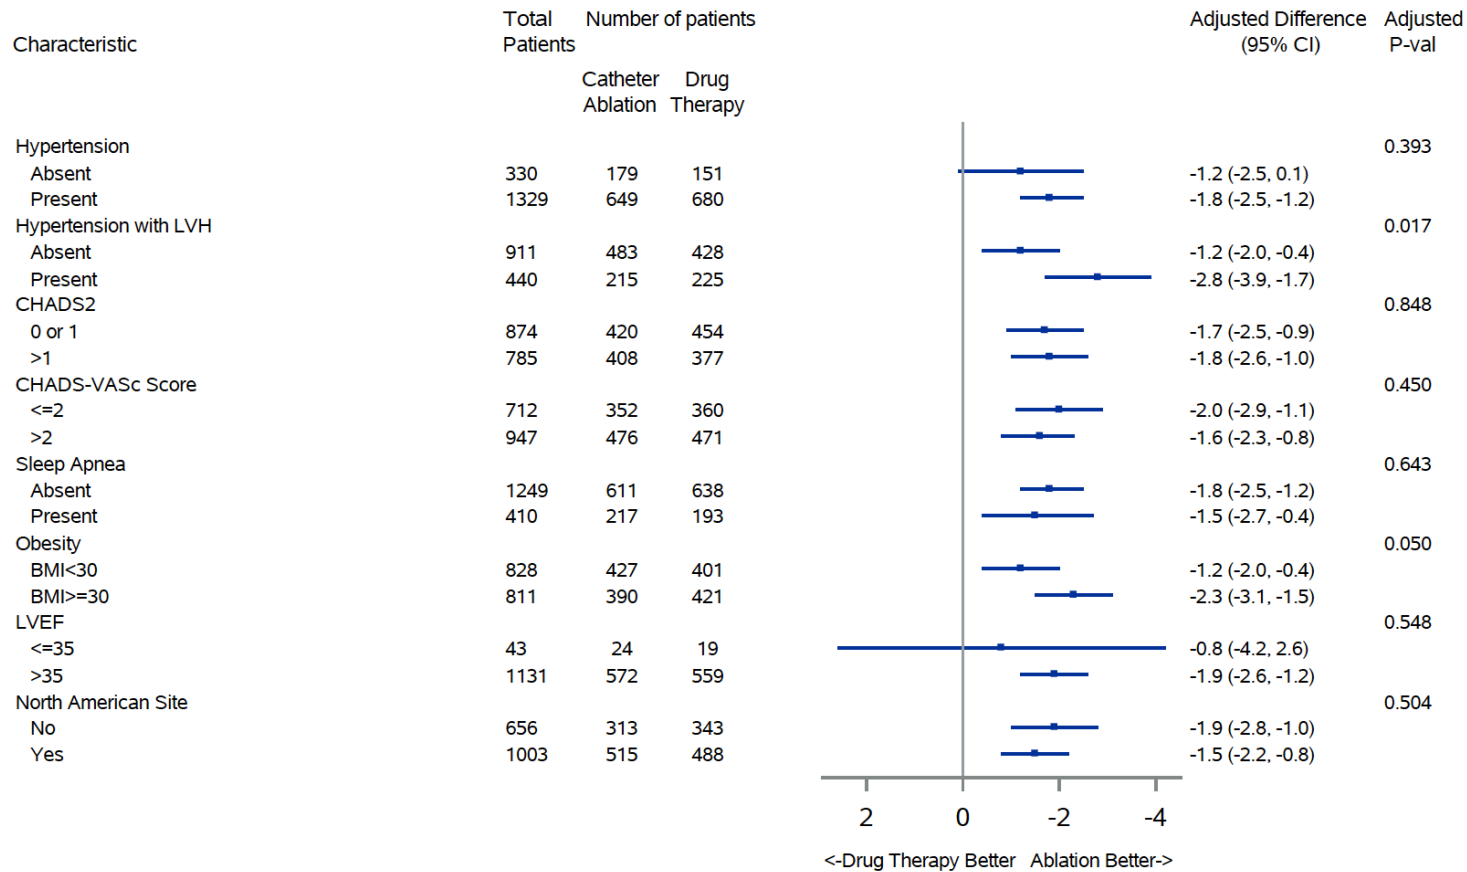

**eFigure 4: AFEQT Summary Scores in the 6-Month Per Protocol Analysis**

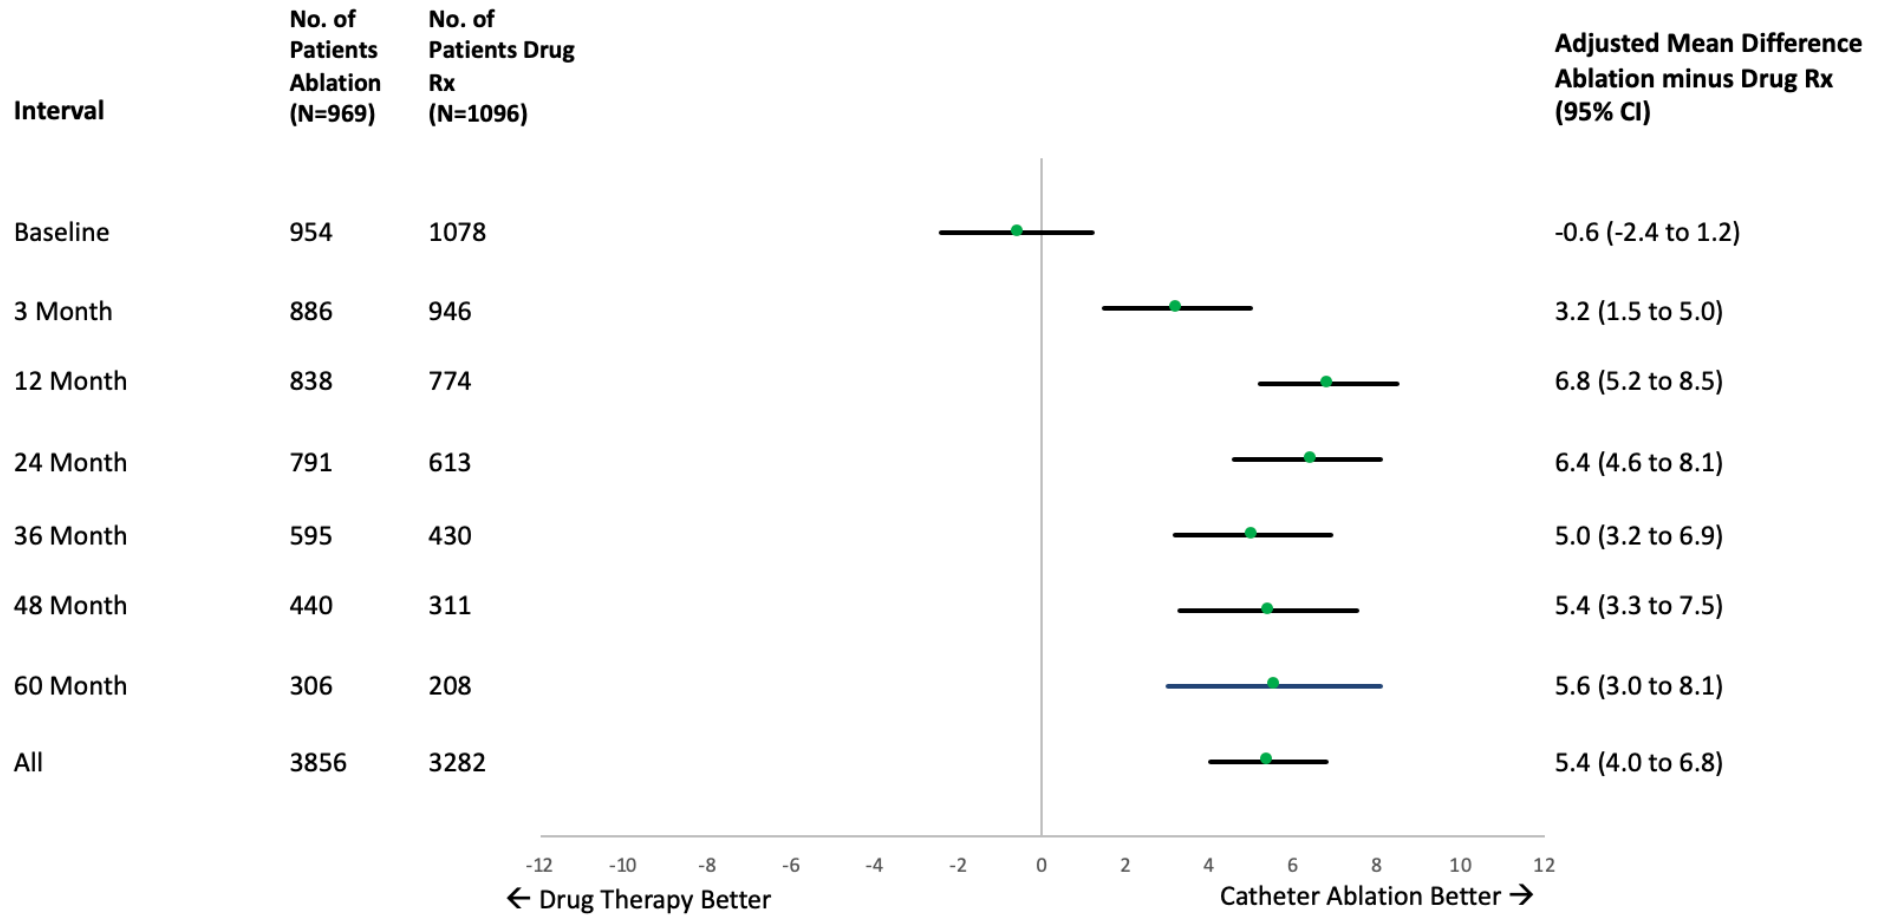

eFigure 5: MAFSI Frequency Scores in the 6-Month Per Protocol Analysis

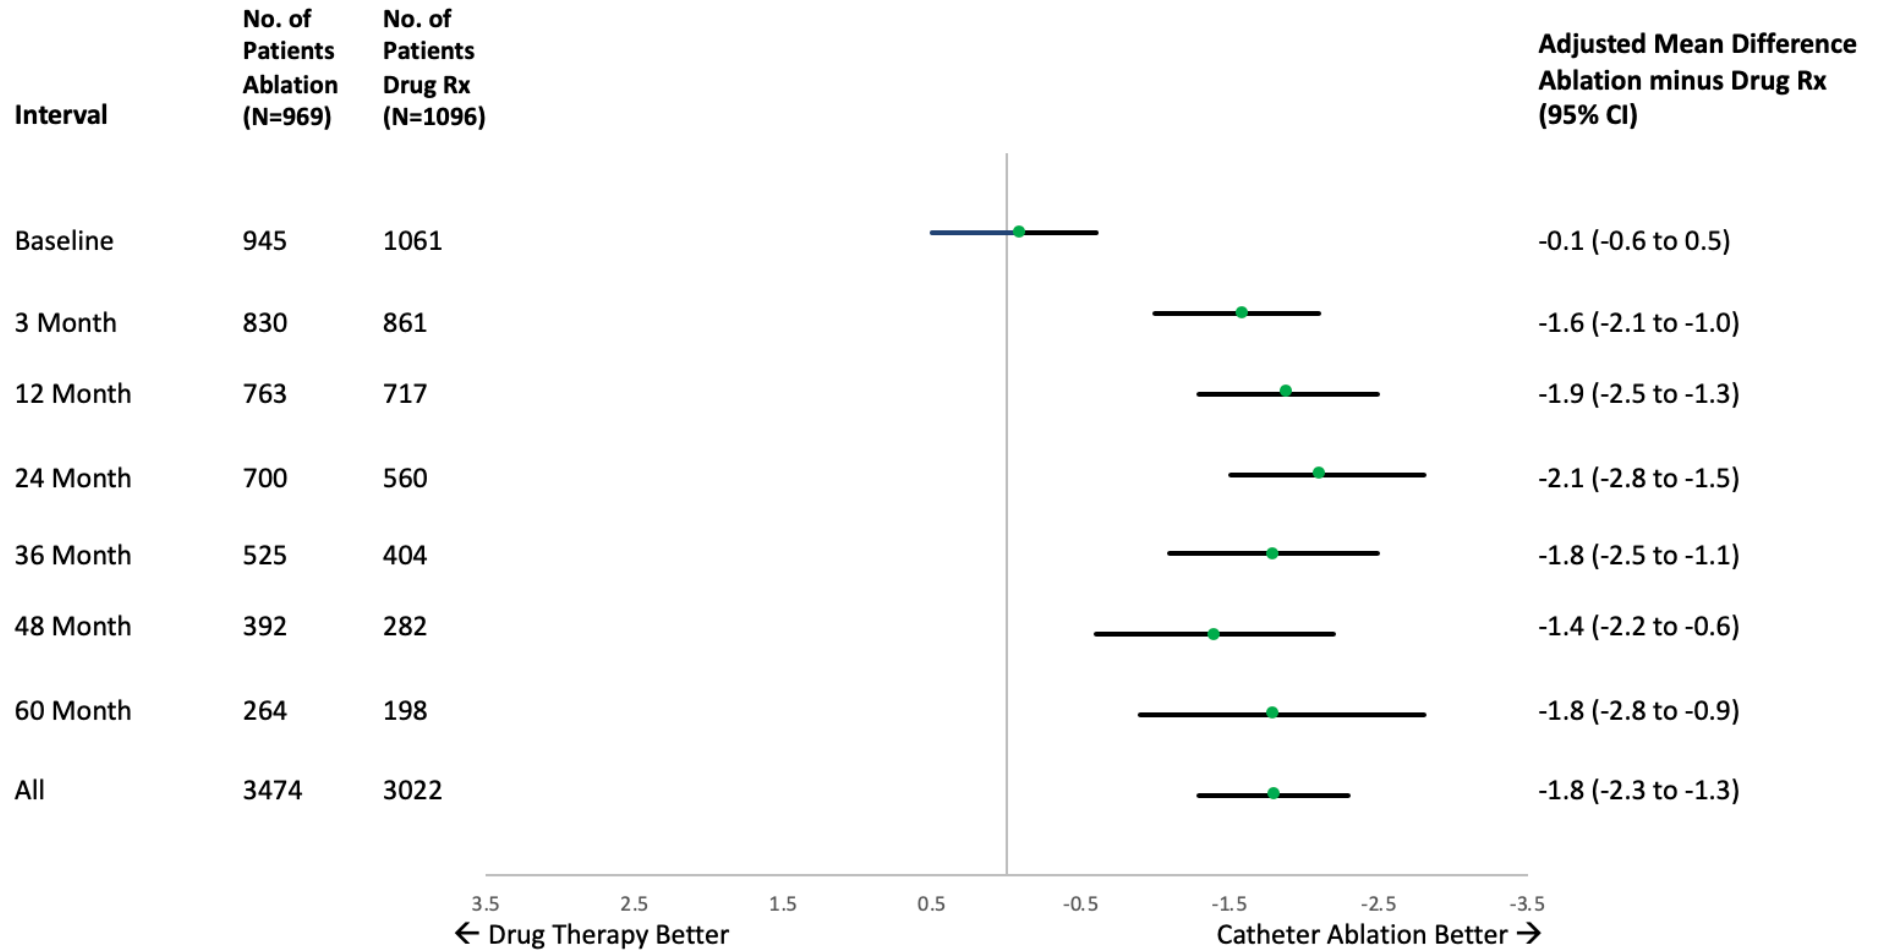



eFigure 6: AFEQT Scores by Baseline Tertiles in the CABANA Trial by Intention-to-Treat

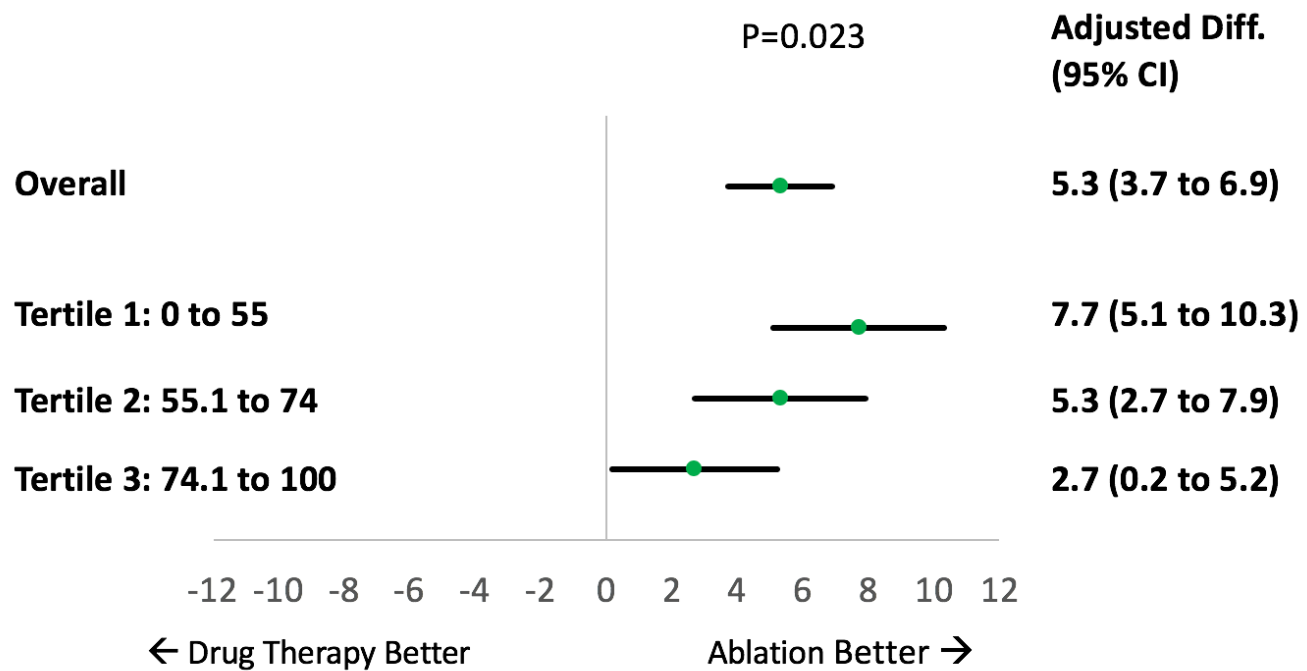

eFigure 7: MAFSI Scores by Baseline Tertiles in the CABANA Trial by Intention-to-Treat

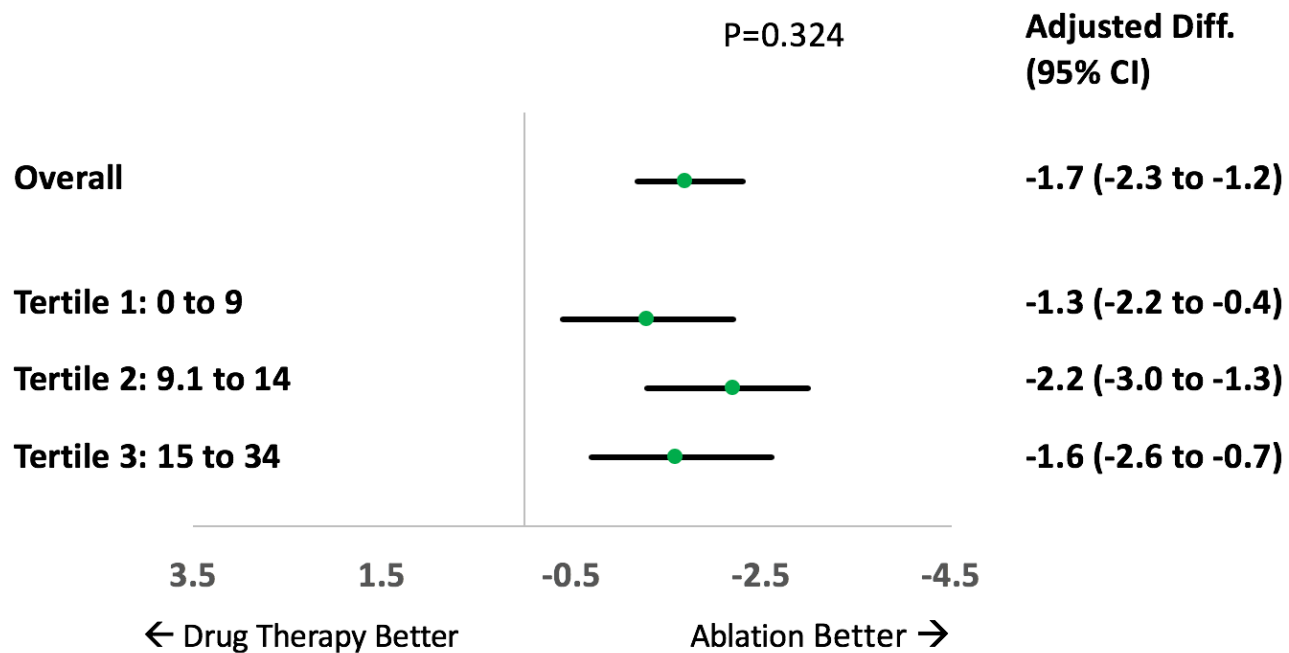

eFigure 8: AFEQT Summary Score Illustrative Changes in the CABANA Trial

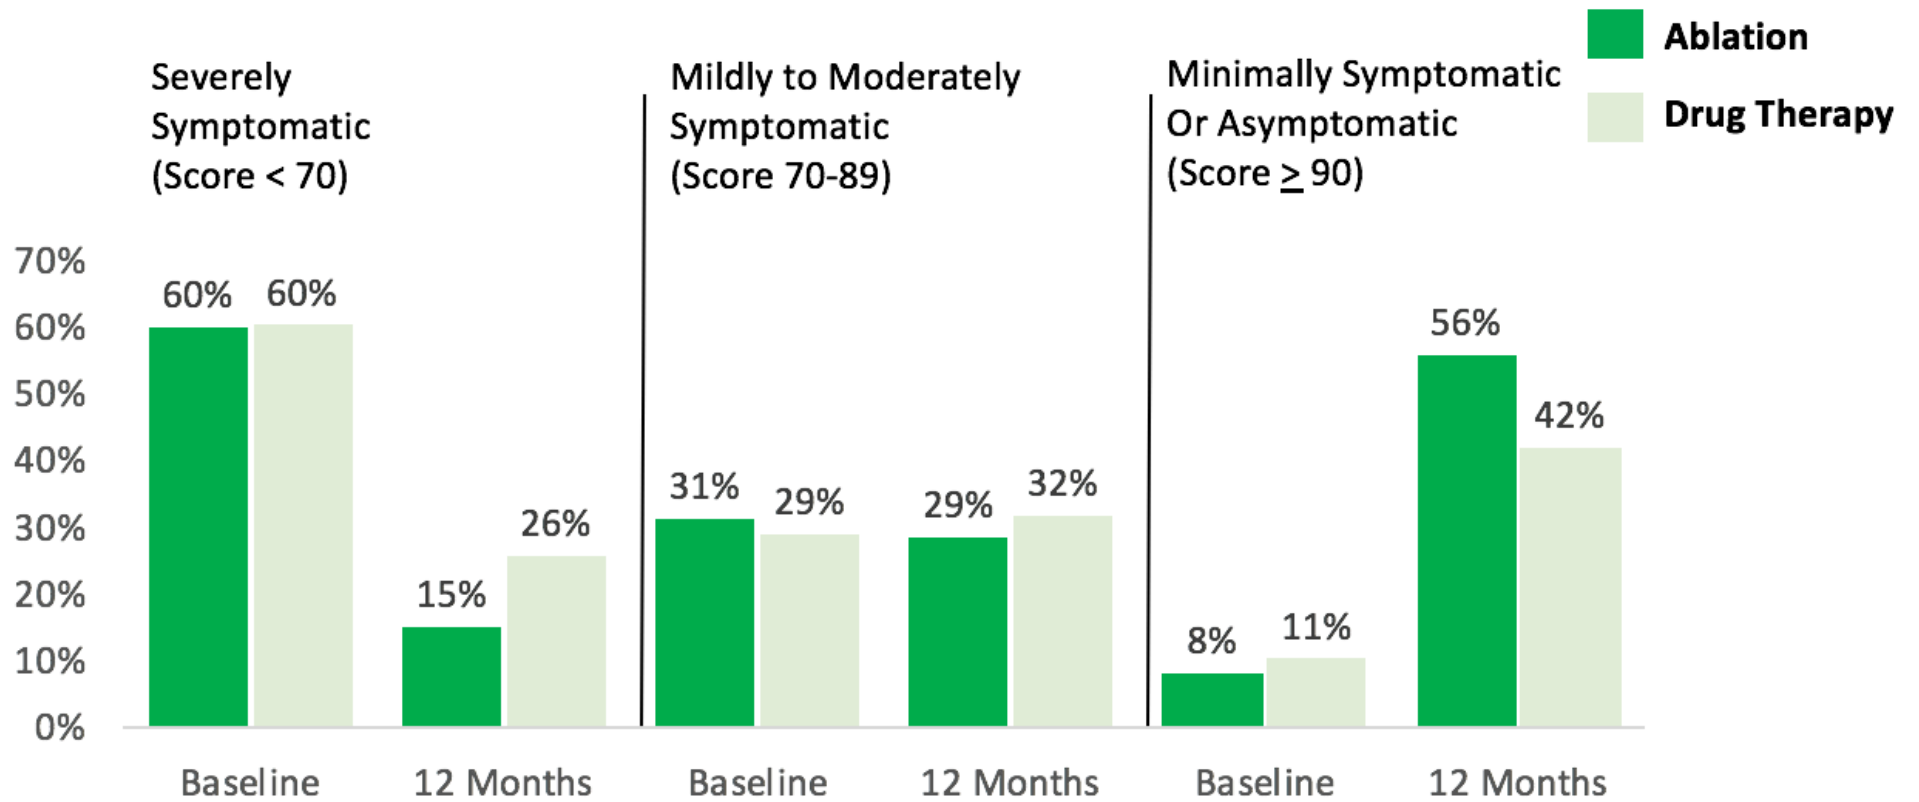

**eFigure 9: AFEQT Summary Score Responder Analysis in the CABANA Trial**

**Responder Analysis for 12-Month AFEQT Summary Score:  
Subgroup with Baseline AFEQT <70**

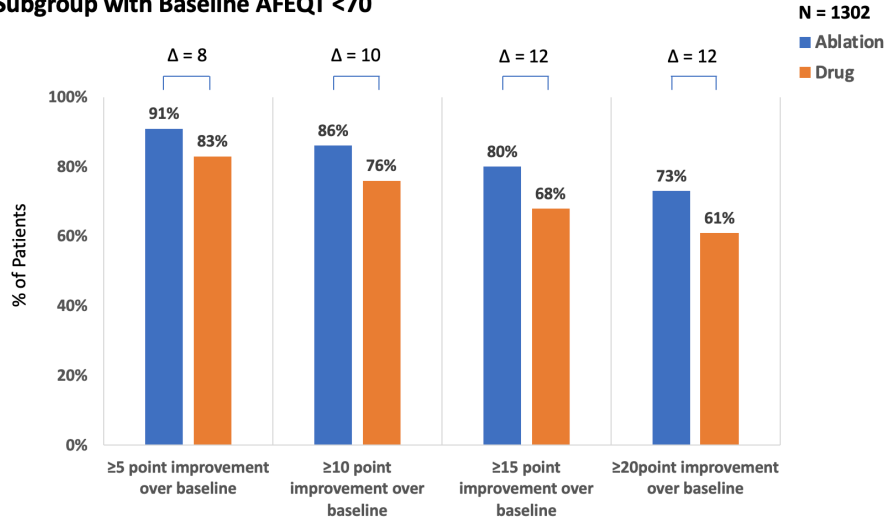

**Responder Analysis for 12-Month AFEQT Summary Score:  
Subgroup with Baseline AFEQT 70-89**

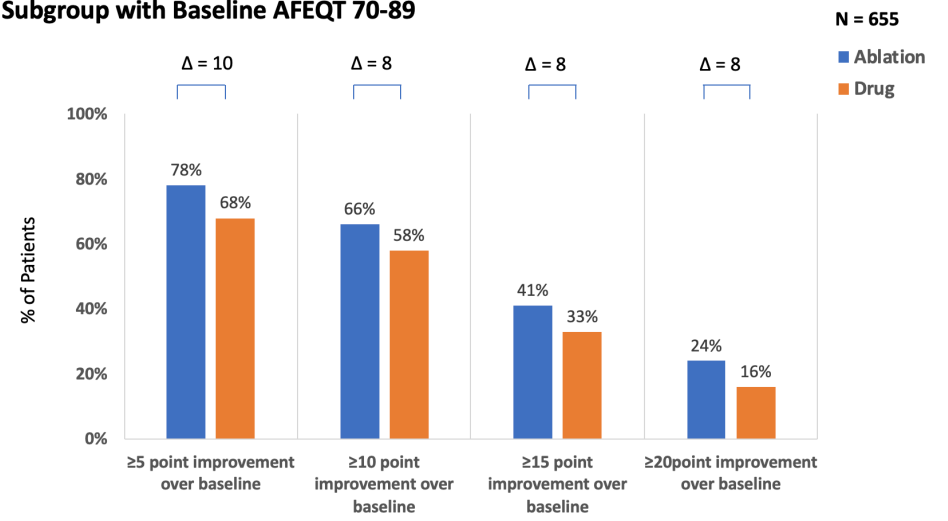

**Responder Analysis for 12-Month AFEQT Summary Score:  
Subgroup with Baseline AFEQT ≥90**

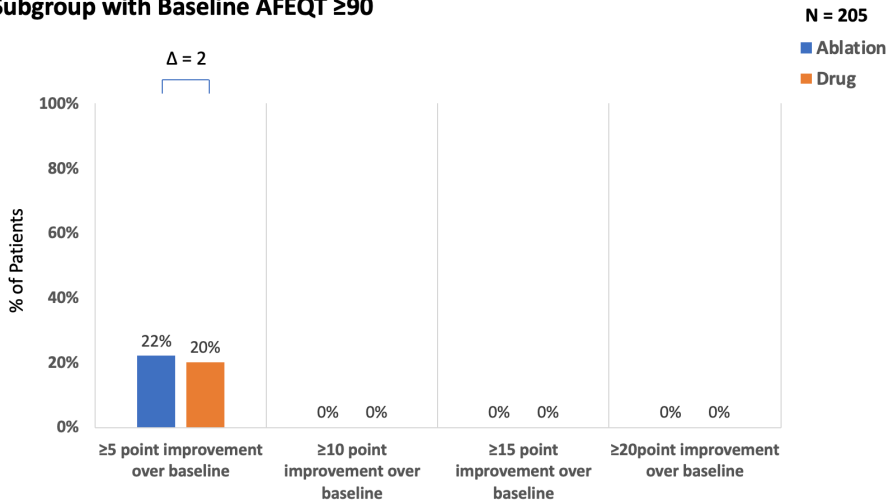

## MAFSI Frequency Score Responder Analysis

We performed a “responder” analysis for the 12-month MAFSI Frequency Score, starting by dividing the MAFSI scores post hoc into categories representing severely symptomatic from AF (MAFSI Frequency Score >9), mildly to moderately symptomatic from AF (MAFSI Frequency Score 4-9), and minimal symptoms to asymptomatic from AF (MAFSI Frequency Score <4). For each of these categories, we examined change (“responder”) scores (12 month minus baseline, correcting for the fact that an improvement in MAFSI is a negative number due to the way it is scaled – worst value is largest, best value is smallest).

Using the baseline MAFSI Frequency Score standard deviation (SD) (~ 6 MAFSI points), we looked at the ITT treatment group differences for  $\frac{1}{4}$  SD ( $\geq 1.5$  points),  $\frac{1}{2}$  SD ( $\geq 3$  points),  $\frac{3}{4}$  SD ( $\geq 4.5$  points), and 1 SD ( $\geq 6$  points). As shown in the figure below (eFigure 9), for the severely symptomatic group (baseline MAFSI >9), the incremental number of responders for ablation relative to drug therapy was greater with the more stringent definitions of “responder” (14 per 100 extra responders using  $\frac{3}{4}$  to 1 SD – clearly a large improvement at the patient level). A similar pattern was seen for patients with baseline MAFSI Frequency Scores in the mild to moderately symptomatic category. In the subgroup with minimal AF symptoms at baseline, an advantage for ablation was only seen with the  $\frac{1}{4}$  SD benchmark ( $\geq 1.5$  MAFSI points), due to the ceiling effect of the instrument.

## eFigure 10: MAFSI Frequency Score Responder Analysis in the CABANA Trial

Responder Analysis for 12-Month MAFSI Frequency Score:  
Subgroup with Baseline MAFSI >9

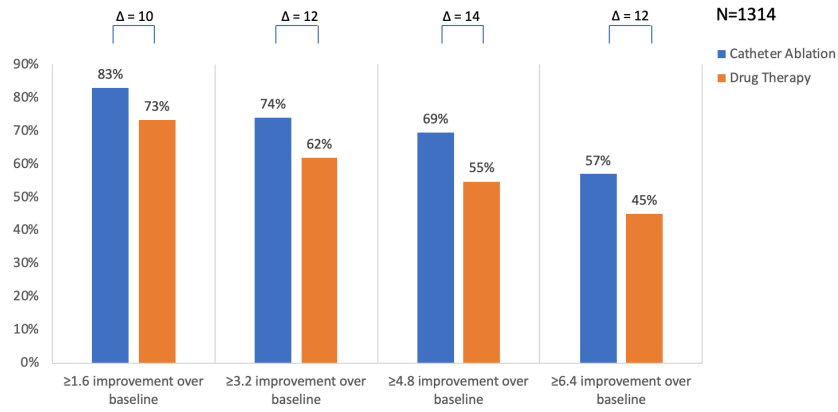

Responder Analysis for 12-Month MAFSI Frequency Score:  
Subgroup with Baseline MAFSI 4-9

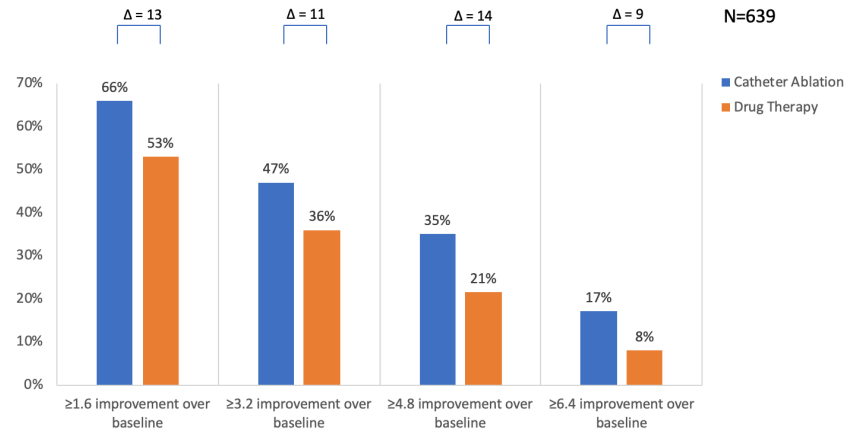

Responder Analysis for 12-Month MAFSI Frequency Score:  
Subgroup with Baseline MAFSI <4

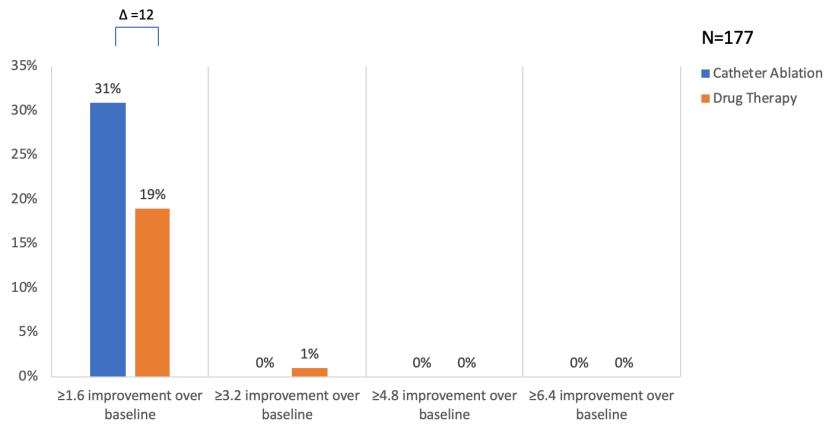

## Supplement References

1. Hlatky MA, Boineau RE, Higginbotham MB, et al. A brief self-administered questionnaire to determine functional capacity (the Duke Activity Status Index). *Am J Cardiol.* 1989;64(10):651-654.
2. Mark DB, Anstrom KJ, Sheng S, et al. Quality-of-Life Outcomes With Anatomic Versus Functional Diagnostic Testing Strategies in Symptomatic Patients With Suspected Coronary Artery Disease: Results From the PROMISE Randomized Trial. *Circulation.* 2016;133(21):1995-2007.
3. Dorian P, Paquette M, Newman D, et al. Quality of life improves with treatment in the Canadian Trial of Atrial Fibrillation. *Am Heart J.* 2002;143(6):984-990.
4. Dorian P, Burk C, Mullin CM, et al. Interpreting changes in quality of life in atrial fibrillation: how much change is meaningful? *Am Heart J.* 2013;166(2):381-387 e388.
5. Ware J, Jr., Snow KK, Kosinski M, Gandek B. *SF-36 Health Survey: Manual & Interpretation Guide.* Boston: The Health Institute, New England Medical Center; 1993.
6. EuroQol--a new facility for the measurement of health-related quality of life. The EuroQol Group. *Health Policy.* 1990;16(3):199-208.
7. Koopman C, Pelletier KR, Murray JF, et al. Stanford presenteeism scale: health status and employee productivity. *J Occup Environ Med.* 2002;44(1):14-20.
8. Reilly MC, Zbrozek AS, Dukes EM. The validity and reproducibility of a work productivity and activity impairment instrument. *Pharmacoeconomics.* 1993;4(5):353-365.
