# Supplementary material
Source: PubMed Central journal article supplement (PMC6450275)
Supplement: jama-e190692-s002.pdf [file jama-e190692-s002.pdf]

## Supplementary Online Content

Mark DB, Anstrom KJ, Sheng S, et al. Effect of catheter ablation vs medical therapy on quality of life among patients with atrial fibrillation: the CABANA randomized clinical trial [published online March 15, 2019]. *JAMA*. doi:10.1001/jama.2019.0692

### **Supplement 2.** Statistical Analysis Plan

This supplementary material has been provided by the authors to give readers additional information about their work.

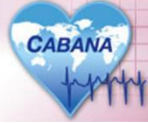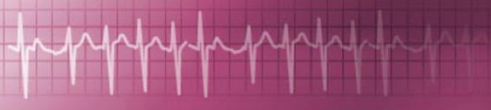

## STATISTICAL ANALYSIS PLAN

---

**Study Title:** The Catheter Ablation versus Antiarrhythmic Drug Therapy for Atrial Fibrillation: Quality of Life Study

**Analysis Type:** Quality of Life

**Analysis Plan Version**

**Date:** 5 May 2018

**Analysis Plan Authors:** Daniel Mark, MD, MPH; Melanie Daniels, BA; J. David Knight, MS; Shubin Sheng, PhD; Kevin J. Anstrom, PhD

---

# 1. INTRODUCTION

Atrial fibrillation (AF) is the most prevalent cardiac arrhythmia problem in contemporary medicine. Available evidence suggests that AF has substantial adverse effects on quality of life (QOL).<sup>1</sup> Prior to designing the Catheter Ablation Versus Antiarrhythmic Drug Therapy for Atrial Fibrillation (CABANA) trial, we examined what was known about the impact of the AF ablation procedure being studied in CABANA on physical functioning and quality of life outcomes. A systematic review identified 49 studies published between 1988 and 2005 that examined the impact of AF on QOL.<sup>2</sup> The vast majority of these studies were small, involving less than 200 patients. Three of the largest randomized clinical trials (STAF, PIAF, RACE) found a greater improvement in QOL with rate control than with rhythm control. However, the AFFIRM trial (n=716), the largest at that time, found no difference between the two strategies. The SAFE-T trial recently reported that patients who achieved sinus rhythm regardless of therapeutic mechanism had significantly improved QOL and exercise capacity.<sup>3</sup> A randomized multicenter pilot study comparing AF ablation with medical therapy in 70 symptomatic AF patients found that ablation therapy improved multiple domains of QOL at 6 months relative to antiarrhythmic therapy, particularly involving general health, physical functioning, and social functioning.<sup>4</sup> A second randomized trial of amiodarone with or without AF ablation in 146 patients with chronic AF found that ablation reduced the severity score on the symptom checklist.<sup>5</sup> There were no large-scale trials or well done observational studies that defined the presence and magnitude of QOL benefits of catheter ablation of AF relative to an appropriate medical therapy control.

Since the start of CABANA, several additional studies have published results on the use of ablation therapy to treat atrial fibrillation. In the MANTRA-PAF trial, 294 patients with paroxysmal AF were randomly assigned to ablation or antiarrhythmic drug therapy. The cumulative burden of AF over two years did not differ between treatment groups in this trial, but the ablation group had fewer patients with AF and there was a trend toward greater improvement in the Short Form (36) Health Survey (SF-36) physical component summary score at 24 months.<sup>6</sup> QOL scores did not change from 2-year follow-up to 5-year follow-up, and there were no statistically significant between-group differences.<sup>7</sup> The RAAFT-2 trial found no difference in EQ-5D scores at 12 months between groups assigned to either ablation or medical therapy.<sup>8</sup> The ThermoCool AF trial randomized 167 patients with symptomatic AF unresponsive to at least one antiarrhythmic drug in a 2:1 ratio to catheter ablation or medical therapy.<sup>9</sup> The primary comparison between treatment arms showed very large improvements in the SF-36 scales through 9 months of study follow-up. Symptom frequency and severity decreased more than 50% in patients treated with ablation. The APAF trial also tested ablation therapy versus antiarrhythmic therapy in 198 patients with paroxysmal AF unresponsive to at least one antiarrhythmic drug.<sup>10</sup> At 4 years of follow-up, SF-36 scores were not different between groups by intention-to-treat, but most patients in the drug therapy arm had crossed over to ablation by that time.

CABANA is a multi-center randomized clinical trial designed to assess the safety and efficacy of percutaneous left atrial catheter ablation versus antiarrhythmic drug therapy in subjects who are at least 18 years of age and have new onset or under-treated paroxysmal, persistent, or long-standing persistent atrial fibrillation (AF) and warrant therapy for their arrhythmia. The study population consists of 2,204 subjects enrolled at 126 clinical sites over a period of approximately six years. Subjects were randomized in equal proportions (1:1) to receive either catheter ablation or drug therapy and followed at regular intervals for the duration of the study. The minimum length of

64 follow-up will be slightly less than 2 years, and the median duration of clinical follow-up will be  
65 approximately 4 years.

66  
67 A prospective quality of life study is being conducted in the CABANA trial to compare QOL  
68 outcomes in subjects randomized to either medical therapy or catheter ablation. Operationally, the  
69 QOL study involves the collection of QOL data at randomization, and at Months 3, 6, and every 6  
70 months thereafter until the end of study (or at the end-of-treatment visit for subjects withdrawing  
71 from the study prior to the end of study visit).

72 Eligibility criteria are described in the clinical study protocol. All subjects were eligible to  
73 participate in the QOL study. The data used for the QOL analyses will include data  
74 collected as part of the main study (demographic and baseline characteristics, and medical  
75 outcomes) and data collected specifically for the QOL study (subject-reported QOL  
76 assessments).

77

### 78 **1.1. QOL Study Objectives**

79  
80 To compare health-related quality of life for catheter ablation as compared with drug therapy by  
81 intention-to-treat.

82  
83

### 84 **1.2. Study Design**

85

|                                 |                                                                               |
|---------------------------------|-------------------------------------------------------------------------------|
| <b>Design Configuration</b>     | Two-arm randomized, parallel assignment, unblinded study                      |
| <b>Treatment Groups</b>         | Group 1: left atrial ablation<br>Group 2: rate or rhythm control drug therapy |
| <b>Key Eligibility Criteria</b> | All subjects enrolled in the study were included in the QOL study.            |

86  
87

## 88 **2. TYPE OF PLANNED ANALYSIS**

89

90 This Statistical Analysis Plan (SAP) describes the statistical design, derivations, and statistical  
91 procedures for the final analysis of the QOL study.

92

93 Patients completed a battery of QOL questionnaires designed to assess health status, atrial  
94 fibrillation-related symptoms, general and atrial fibrillation-specific physical and social  
95 activities, emotional well-being, and demographic items. The list of instruments used is shown in  
96 Table 1.

97

98 **Table 1. QOL Study Questionnaires**

99

| <b>Instrument</b> | <b>Used to Assess</b> | <b>Items</b> | <b>Scale of Measurement Analysis Methods To Be Used</b> |
|-------------------|-----------------------|--------------|---------------------------------------------------------|
|-------------------|-----------------------|--------------|---------------------------------------------------------|

|                                                                |                                              |    |          |
|----------------------------------------------------------------|----------------------------------------------|----|----------|
| Atrial Fibrillation Effect and Quality of Life (AFEQT)         | Atrial Fibrillation-Specific Quality of Life | 20 | Interval |
| Mayo AF Symptom Inventory (MAFSI)                              | Atrial Fibrillation Symptoms                 | 10 | Interval |
| Duke Activity Status Index (DASI)                              | Physical Function                            | 12 | Interval |
| Toronto Atrial Fibrillation Severity Score                     | Atrial Fibrillation Symptoms                 | 19 | Interval |
| SF-36 Global Health                                            | Global Health Utility                        | 1  | Ordinal  |
| SF-36 General Health                                           | General Health                               | 5  | Interval |
| SF-36 MHI-5                                                    | Overall Mental Health                        | 5  | Interval |
| SF-36 Physical Functioning                                     | Overall Physical Functioning                 | 10 | Interval |
| SF-36 Social Functioning                                       | Social Functioning                           | 2  | Interval |
| SF-36 Bodily Pain                                              | Pain Consequences                            | 2  | Interval |
| SF-36 Vitality                                                 | Energy/Fatigue                               | 4  | Interval |
| SF-36 Role Physical                                            | Physical Impact on Daily Activities          | 4  | Interval |
| SF-36 Role Emotional                                           | Emotional Impact on Daily Activities         | 3  | Interval |
| EuroQoL (EQ-5D-3L)                                             | Health State                                 | 5  | Interval |
| EQ-5D Visual Analog Scale (EQ-5D VAS)                          | Health Utility                               | 1  | Interval |
| Stanford Presenteeism Scale (SPS-6)                            | Work Impact                                  | 6  | Interval |
| Work Productivity and Activity Impairment Questionnaire (WPAI) | Work Impact                                  | 5  | Interval |

100 Additional information was collected on work status, educational background, and marital status.

101

102

103 **3. GENERAL CONSIDERATIONS FOR DATA ANALYSES**

104  
105 **3.1. Analysis Population**

106  
107 The analysis population for the QOL study will be all randomized patients.

108  
109 **3.2. Data Sources**

110  
111 The enrolling clinical sites complete a series of electronic Case Report Forms (eCRF) for  
112 collection of the clinical data on each subject randomized, including demographic, clinical, and  
113 quality of life forms at enrollment and at specified follow-up intervals (the follow-up intervals are  
114 detailed in the study protocol), event forms for death, neurological events, bleeding, cardiac arrest,  
115 and other ancillary forms as required. Additional details on clinical data collection and data  
116 management are provided in the main CABANA SAP.

117  
118 The quality of life data collection involves a baseline phase and a follow-up phase. At baseline,  
119 the coordinators at each enrolling site were responsible for collection of all the baseline QOL data  
120 forms using structured interviews: Full QOL questionnaire, EQ-5D worksheet, and MAFSI  
121 worksheet. Each coordinator underwent training for this task by the EQOL CC at DCRI before  
122 beginning this data collection. Baseline QOL Questionnaire data was entered into a secure Access  
123 2010 database at the DCRI EQOL CC. The baseline EQ-5D and MAFSI worksheets were entered  
124 by site staff into the InForm electronic data capture (EDC) system.

125  
126 In the original design of CABANA, all enrollment was envisioned to come from North America  
127 and the plan for follow-up QOL data collection was to have the Call Center at the DCRI EQOL  
128 CC perform the scheduled structured interviews by phone. This plan had to be modified when  
129 enrollment was extended internationally so that for sites outside North America, follow-up  
130 interviews were conducted by the site coordinators of the individual international sites and then  
131 transmitted via secured facsimilie or email to the EQOL CC. Follow-up QOL questionnaires were  
132 entered into the EQOL CC Access database. All sites continued to enter EQ-5D and MAFSI  
133 worksheets into InForm during follow-up intervals.

134  
135 All QOL data collected in the study are being managed and analyzed at the CABANA EQOL CC  
136 in the DCRI. The QOL questionnaires are carefully reviewed for completeness and run through  
137 data quality checks. The InForm eCRF data are imported into the EQOL CC Access database and  
138 then downloaded as raw SAS data files, and further review and checking of the data occur. The  
139 raw SAS data, analysis datasets, and analysis programs are stored on the secure DCRI statistical  
140 server. Final analyses will be performed at the DCRI using SAS version 9.4 or higher (SAS  
141 Institute Inc., Cary, NC).

142  
143 **3.3. Treatment Groups**

144  
145 Subjects will be grouped for analyses according to the randomized treatment assignment using the  
146 principle of intention to treat.

147  
148 **3.4. Data Analysis**

149  
150 The co-primary endpoints for the QOL study are the AFEQT and MAFSI.

151  
 152 Statistical comparisons will be performed using linear models that are appropriate for the  
 153 outcome variables. There will be no adjustments for multiple comparisons. All secondary QOL  
 154 endpoint comparisons (Table 2) are considered to serve the role of supporting and enhancing  
 155 our understanding of the patient’s perspective on the two treatments tested in CABANA.  
 156

**Table 2. Secondary Endpoints**

|                                                  |
|--------------------------------------------------|
| DASI                                             |
| Toronto Atrial Fibrillation Severity Scale       |
| SF-36 Global Health Utility                      |
| SF-36 General Health                             |
| SF-36 Mental Health Inventory-5 (MHI-5)          |
| SF-36 Physical Functioning                       |
| SF-36 Social Functioning                         |
| SF-36 Bodily Pain                                |
| SF-36 Vitality                                   |
| SF-36 Role Physical                              |
| SF-36 Role Emotional                             |
| EQ-5D-3L                                         |
| EQ-VAS                                           |
| Stanford Presenteeism Scale (SPS-6)              |
| Work Productivity and Activity Impairment (WPAI) |

157  
 158  
 159 **3.5. Missing Data**  
 160

161 Extensive procedural efforts were made during CABANA to minimize the amount of  
 162 missing data on the QOL questionnaires. Study personnel verified that any missing  
 163 responses in the questionnaires were intentional on the subject’s part. Subjects who  
 164 discontinued drug therapy were encouraged to continue in all study assessments as  
 165 scheduled and will be included in the analyses.  
 166

167 In preliminary analysis work, we will evaluate patterns of missingness as follows:  
 168 • compare subjects with missing data versus subjects without missing data by study  
 169 center, demographics, and other relevant subject characteristics; we will also examine  
 170 narrative reasons for missing data when available to see if the missingness can be  
 171 classified as administrative or disease-related  
 172 • evaluate the reasons and time to premature study discontinuation by treatment group  
 173 among the QoL analysis population; and  
 174 • examine the frequency of subjects, by treatment group, in relation to the observed  
 175 permutations of missingness across time points.  
 176

177 Rules for handling missing items within questionnaire domains (ie, the proportion of items  
 178 that can be missing before an endpoint is treated as missing) and the statistical approaches  
 179 used to address instances where the entire domain score or instrument for a subject is  
 180 missing are provided in Section 6.

181  
182  
183  
184  
185  
186  
187  
188  
189  
190  
191  
192  
193  
194  
195  
196  
197  
198  
199  
200  
201  
202  
203  
204  
205  
206  
207  
208  
209  
210  
211  
212  
213  
214  
215  
216  
217  
218  
219  
220  
221  
222  
223  
224  
225  
226  
227

### **3.6. Follow-up Contact Windows**

Full QOL questionnaires were collected at randomization and months 3, 12, and every 12 months thereafter (or at the end of treatment visit for subjects withdrawing from the study prior to the end of study visit). Brief QOL questionnaires were collected at month 6 and every 12 months thereafter. Abbreviated proxy QOL questionnaires were collected for incapacitated patients.

The completion of an end-of-treatment contact could result in a subject having more than 1 set of questionnaires categorized to a given study contact. In those instances, the full questionnaire completed closest to the target date of the expected study contact will be used in the analyses, using the earlier questionnaire in case of a tie.

### **3.7. Timing of Analysis**

The analysis of the unblinded data for the QOL study will be conducted following the lock of the clinical database. The need for more than one database lock is not anticipated for this study. Therefore, data handling and blinding issues relevant to studies with multiple, planned database locks are not applicable.

### **3.8. “On Treatment Analysis”**

The intention-to-treat analyses in this trial will constitute the primary analyses and will serve as the standard for interpreting treatment differences in the key clinical outcomes. However, because a number of patients in the drug arm may cross over to receive ablation during the trial, and some patients randomized to ablation may not undergo the procedure, we will supplement the intent-to-treat comparisons with “on-treatment” comparisons. The “on-treatment” analysis will involve a comparison of patients who received ablation (even if originally assigned to the drug arm) versus those who did not.

### **3.9. Per-Protocol Analysis**

An analysis will also be performed to compare the primary endpoint and the key secondary clinical outcomes of the two treatment strategies among the subset of patients who fully satisfied the inclusion/exclusion criteria and received the treatment to which they were randomly allocated. This analysis will include patients randomized to the drug arm who were treated with drug therapy, and patients randomized to the ablation arm who underwent the ablation within 6 months following enrollment in the trial. The follow-up of drug-arm patients who crossed over to ablation will be censored at the time of the ablation. Patients randomized to the ablation arm who were not ablated within 6 months will be excluded from this analysis.

## **4. BASELINE QOL DATA**

Baseline responses/scores on the QOL endpoints will be summarized by treatment group and overall. The endpoints will be summarized using the standard 5 number summary – mean, standard deviation, median, 25<sup>th</sup> and 75<sup>th</sup> percentiles.



228  
229  
230  
231  
232  
233  
234  
235  
236  
237  
238  
239  
240  
241  
242  
243  
244  
245  
246  
247  
248  
249  
250  
251  
252  
253  
254  
255  
256  
257  
258  
259  
260  
261  
262  
263  
264  
265  
266  
267  
268  
269  
270  
271  
272  
273

## **5. SUBJECT CHARACTERISTICS AND SUBJECT DISPOSITION DATA**

As discussed in section 3.5, subjects with missing data will be compared with subjects without missing data by study center, demographics, and other key subject characteristics. A Pearson chi-square test for categorical variables and a Wilcoxon rank sum test for continuous variables will be used to help gauge any differences between the two cohorts.

Subject disposition among the QOL analysis population will be summarized, including reasons for premature study discontinuation. In addition, the frequency of subjects in relation to the observed permutations of missingness across the expected time points will be summarized by treatment group.

## **6. ENDPOINT ANALYSES**

### **6.1. Primary QOL Endpoints**

The two coprimary endpoints for the QOL comparison in CABANA are the Atrial Fibrillation Effect and Quality of Life Scale (AFEQT) and the Mayo AF-Specific Symptom Inventory (MAFSI). The primary analysis of these endpoints will focus on the estimated treatment effect at 12 months. Comparisons at other time points and overall (integrating across all follow-up) will be considered secondary comparisons.

#### **6.1.1. Primary QOL Endpoint Definitions**

##### **Atrial Fibrillation Effect and Quality of Life Scale (AFEQT)**

The **AFEQT**<sup>11</sup> is a validated 20-item atrial fibrillation-specific, health-related quality of life questionnaire designed to assess the impact of atrial fibrillation on patients HRQOL and possibly changes with treatment. The AFEQT has an Overall Score and subscale scores in three domains: symptoms, daily activities, and treatment concern. Two questions regarding satisfaction with health care providers and with treatment are not included in the Overall AFEQT Score and were not collected for the CABANA study.

##### *General Scoring Information*

The responses on the AFEQT are scored on a 1 to 7 Likert scale, where 1 = "Not at all..." to 7 = "Extremely...".

If questionnaire says 'no AF symptoms' use response options :

- o "Not Bothered at All OR I Did Not Have This Symptom"
- o "Not At All Limited"
- o "Not At All Bothered"
- o "No Difficulty At All"
- o "Not Applicable"
- o "Strongly Disagree" (work questions)

274  
 275 FOR intervals > 18 months: If patient states “ I haven’t had Atrial Fibrillation >1 year ago OR say “I  
 276 was never aware of having atrial fibrillation”, use skip pattern:  
 277 Brief Follow-Up QX (18, 30 and 42 Mo intervals) skip qxs # 3-7  
 278 Full Follow-up QX (24, 36, and 48 Mo intervals) skip qxx # 15-19  
 279 Proxy QX (18, 24, 30, 36, 42, 48 Mo intervals) skip qxs # 15-17

280  
 281

282 *Overall AFEQT HRQOL Score*

283 The AFEQT HRQOL Score is calculated based on the following formula:

284

$$100 - \frac{(\text{sum of severity for all questions answered} - \text{number of questions answered}) \times 100}{(\text{total number of questions answered} \times 6)}$$

285  
 286

287 *Subscale Scores*

288 Subscale scores are computed similarly to the Overall AFEQT Score from each subscale used  
 289 to generate its own score.

290  
 291

The 18 questions are grouped into 3 functional subscales as described below:

292

| <b>Table 5: AFEQT Subscales</b> |                                                |
|---------------------------------|------------------------------------------------|
| <b>Subscales</b>                | <b>Questions on the Full QOL Questionnaire</b> |
| Symptoms                        | 15a, 15b, 15c, and 15d                         |
| Daily Activities                | 21a, 21b, 24a, 24b, 24c, 24d, 24e, and 24f     |
| Treatment Concern               | 22d, 22e, 23a, 23b, 23c, and 23d               |

293  
 294

*Interpretation*

295 Overall or subscale scores range from 0 to 100. A score of 0 corresponds to complete disability  
 296 (or responding “extremely” limited, difficult, or bothersome to all questions answered), while a  
 297 score of 100 corresponds to no disability (or responding “not at all” limited, difficult, or  
 298 bothersome to all questions answered).

299  
 300

For example, if a patient answered all “1” for the Symptoms subscale, the subscale score would  
 301 be  $100 - [(4 - 4) / 4 \times 6] \times 100 = 100 - [0 / 24] \times 100 = 100$  or patient has no disability.

302  
 303

Conversely, if a patient answered all “7” for the Symptoms subscale, the subscale score would  
 304 be  $100 - [(28 - 4) / 4 \times 6] \times 100 = 100 - [24 / 24] \times 100 = 0$  or patient is extremely limited.

305  
 306

**Handle Missing Items:**

307 At least 50% of completed responses for each domain are required to calculate a meaningful  
 308 score.

309  
 310

**Mayo AF-Specific Symptom Inventory (MAFSI)**

311  
 312

We used a modified **MAFSI**<sup>12</sup> questionnaire comprised of a 10-item atrial fibrillation symptom  
 313 checklist asking for both frequency and severity of each symptom. The frequency of symptoms  
 314

315 over the past month is recorded as 0 (never), 1 (rarely), 2 (sometimes), 3 (often), and 4 (always).  
316 Items are then summed for a total frequency score. The severity of each symptom is recorded as 1  
317 (mild), 2 (moderate), and 3 (extreme). Items are then summed for the total severity score.

318  
319 **Handle Missing Items:**  
320 If four or more items are missing, the MAFSI endpoint will be considered missing.

### 322 *Interpretation*

323 Total frequency score ranges from 0 to 40 with a score of 0 indicating no atrial fibrillation  
324 symptoms. Total severity score ranges from 0 to 30, with a score of 30 indicating the most severe  
325 symptoms.

## 326 **6.1.2. Analysis of Primary QOL Endpoints**

327  
328 The primary analysis for the AFEQT and MAFSI assessments will be performed using the  
329 intention-to-treat principle on the QOL data analysis set. The AFEQT and MAFSI endpoints will  
330 be analyzed using a repeated-measures mixed model with the baseline score as a covariate, Month  
331 3, Month 12, Month 24, Month 36, Month 48, and Month 60 responses included as outcome  
332 variables, and time as a fixed variable.

333 Restricted maximum likelihood estimation will be used to model all available data from each  
334 subject without imputing missing values. An unstructured covariance matrix will be used.

335  
336 Point estimates for each treatment group and treatment group mean differences (ablation –  
337 medical treatment) with 95% confidence intervals (CIs) will be generated for each time point.  
338 The primary assessment will be based on the treatment group difference at Month 12. Additional  
339 analyses will examine the treatment effect at Months 3, 24, 36, 48, and 60. Additionally, the  
340 treatment effect will be averaged across the 6 follow-up time points. The estimated treatment  
341 difference and 95% CIs will be obtained using the ESTIMATE Statement in SAS PROC  
342 MIXED.

343  
344

## 345 **6.2. Secondary QOL Endpoints**

346

### 347 **6.2.1. Secondary QOL Endpoint Definitions**

348

349

#### 350 **Duke Activity Status Index (DASI)**

351

352 The **DASI**<sup>13</sup> is a validated 12-item questionnaire that assesses general physical functioning;  
353 activities range in physical demands from self-care to strenuous sports. The DASI is comprised  
354 of questions 2 through 13 on the QOL CRF.

355

356 The possible responses to each item are 1 = Yes, with no difficulty, 2 = Yes, but with some  
357 difficulty OR I couldn't do this, 3 = Don't do this for other reasons. Each item answered 'Yes,  
358 with no difficulty' will be assigned a weighted score corresponding to the average amount of  
359 metabolic output implied in its performance; see Table 6 below. Items answered "Yes, but with  
360 some difficulty OR I couldn't do this" or "Don't do this for other reasons" will be assigned a  
361 score of 0. If more than 4 items are missing, the DASI endpoint will be considered missing.

362 Otherwise, weighted scores will be summed to achieve a total score. The total score can range  
 363 from 0 to 58.2; lower scores indicate worse physical functioning. The total score will be used in  
 364 the analyses. For an individual patient, a clinically significant change is considered to be 4  
 365 points or more.  
 366

367 **Table 6. Weighted Scores Assigned to DASItems**  
 368

| DASI Item # | eCRF Question # | Activity                                                                                                                                  | Yes, with no difficulty | Yes, but with some difficulty OR I couldn't do this | Don't do this for other reasons |
|-------------|-----------------|-------------------------------------------------------------------------------------------------------------------------------------------|-------------------------|-----------------------------------------------------|---------------------------------|
| 1           | 2               | Could you take care of yourself (eating, dressing, bathing or using the toilet)?                                                          | 2.75                    | 0                                                   | 0                               |
| 2           | 3               | Could you walk indoors, such as around your house?                                                                                        | 1.75                    | 0                                                   | 0                               |
| 3           | 4               | Could you walk a block or two on level ground?                                                                                            | 2.75                    | 0                                                   | 0                               |
| 4           | 5               | Could you climb a flight of stairs or walk up a hill?                                                                                     | 5.50                    | 0                                                   | 0                               |
| 5           | 6               | Could you run a short distance?                                                                                                           | 8.00                    | 0                                                   | 0                               |
| 6           | 7               | Could you do light work around the house like dusting or washing dishes?                                                                  | 2.70                    | 0                                                   | 0                               |
| 7           | 8               | Could you do moderate work around the house like vacuuming, sweeping floors or carrying in groceries?                                     | 3.50                    | 0                                                   | 0                               |
| 8           | 9               | Could you do heavy work around the house like scrubbing floors or lifting and moving heavy furniture?                                     | 8.00                    | 0                                                   | 0                               |
| 9           | 10              | Could you do yard work like raking leaves, weeding or pushing a power mower?                                                              | 4.50                    | 0                                                   | 0                               |
| 10          | 11              | Could you have sexual relations?                                                                                                          | 5.25                    | 0                                                   | 0                               |
| 11          | 12              | Could you participate in moderate recreational activities like golf, bowling, dancing, doubles tennis or throwing a baseball or football? | 6.00                    | 0                                                   | 0                               |
| 12          | 13              | Could you participate in strenuous sports like swimming, singles tennis, football, basketball or skiing?                                  | 7.50                    | 0                                                   | 0                               |

369  
 370  
 371 **The University of Toronto Atrial Fibrillation Severity Scale (AFSS)**  
 372

373 The Atrial Fibrillation Severity Scale is a 19-item disease-specific questionnaire used to assess  
 374 AF-related symptoms, health care utilization, and the frequency, duration, and severity of AF

375 episodes.<sup>12</sup> Questions on the CABANA QOL CRF corresponding to the below scoring  
 376 instructions are as follows:  
 377

| Toronto AFSS Question # | CABANA QOL Full Questionnaire # |
|-------------------------|---------------------------------|
| 5                       | 16                              |
| 6                       | 17                              |
| 7                       | 19                              |
| 8                       | 18                              |

378  
 379  
 380 The **Total AF Burden** score is obtained by combining measures of frequency (question #5),  
 381 duration (question #6), and patient perceived severity (the average of questions #7 & #8).  
 382

383 Question #5 has responses ranging from 1-11, and patients that respond "less than once a year" are  
 384 given a score of 10 instead of 11 for the purpose of this calculation. For question #6, the score for  
 385 each patient is divided by 8 and multiplied by 10 so that each patient will have a value for this  
 386 question that falls in the range of 1-10.  
 387

388 **\*\*Once that is completed, both questions #5 and #6 are reverse coded (ie. for question #5,  
 389 "continuous" should be reverse coded so that it =10, "more than twice a day"=9, etc).\*\***  
 390

391 Total AF Burden = AF frequency + AF duration + AF severity. Each of the 3 measures contribute  
 392 equally to the AF burden score, and each measure ranges from 1-10 to yield Total AF Burden  
 393 scores ranging from 3-30.  
 394

395 *Interpretation*  
 396 Higher scores indicate greater AF burden.  
 397

398 The **AF Severity** score is calculated as the arithmetic mean of questions #7 & #8. Score range  
 399 from 1 to 10.  
 400

401 *Interpretation*  
 402 Higher scores indicate greater severity.  
 403

404 Handle Missing Items:  
 405 If one or more items are missing, the Total AF Burden Score AFSS endpoint will be considered  
 406 missing.  
 407  
 408

409 **The Medical Outcomes Study 36-Item Short-Form Health Survey (SF-36)**  
 410

411 The SF-36<sup>14</sup> is a 36-item questionnaire used to provide a detailed assessment of functioning and  
 412 well-being from a generic health status perspective. The instrument provides an Global Health  
 413 Utility and 8 subscales. The SF-36 asks patients to recall health status “during the past 4 weeks.”  
 414 Scores range from 0 to 100 with higher scores representing better health status. A clinically  
 415 significant change for a patient using this scoring system has not been established but can be  
 416 approximated by a ¼ standard deviation, or 5 points or more.  
 417

418 The **SF-36 Global Health Utility** is a 1-item question from the SF-36 General Health scale that  
419 assesses general health perception. The GHU is question 1 on the Full QOL Questionnaire. The  
420 possible ordinal responses to the question are 1 = Excellent, 2 = Very Good, 3 = Good, 4 = Fair,  
421 and 5 = Poor. If the response is missing, then the endpoint will be considered missing.  
422 The GHU will be analyzed as an ordinal outcome measure. A nonparametric approach will be  
423 used to compare differences between treatment groups at each time point. Missing data will be  
424 imputed as the worst possible value in the non-parametric analysis.  
425  
426

427 The **SF-36 General Health Scale** is a 5-item questionnaire that assesses overall health status.  
428 The general health items are questions 1, 38a, 38b, 38c, and 38d on the Full QOL Questionnaire.  
429 The possible responses to question 1 are 1 = Excellent, 2 = Very Good, 3 = Good, 4 = Fair, and  
430 5 = Poor. The possible responses to questions 38a—38d are 1 = Definitely true, 2 = Mostly true,  
431 3 = Don't know, 4 = Mostly false, and 5 = Definitely false. The transformed general health scale  
432 score will be used for the analyses. Transformed scores range from 0 to 100; lower scores  
433 indicate worse general health status.  
434

435 The procedures below will be followed to obtain a transformed general health score:

- 436  
437     ▪ Assign a final value for each item:
  - 438  
439         • The pre-coded values for question 1, 38b, and 38d will be reverse coded to obtain the  
440         final value (e.g., a response of '1 = Excellent' will be assigned a value of 5; '2 = Very  
441         Good' will be assigned a value of 4).
  - 442  
443         • The pre-coded values for items 38a and 38c will be retained as the final item value (e.g.,  
444         a response of '1 = Definitely true' will be assigned a value of 1; '2 = Mostly true' will be  
445         assigned a value of 2).
  - 446  
447         • This process will result in higher values for each item indicating better general health.  
448
- 449     ▪ Handle missing items:
  - 450  
451         • The "half-scale" rule for imputing missing scores will be applied. That is, if a subject  
452         answered at least 3 of the 5 items, then a person-specific estimate for any missing items  
453         will be imputed. If more than 2 items are missing, then the general health endpoint will  
454         be considered missing.  
455
- 456     ▪ Compute the raw scale score:
  - 457  
458         • After recoding and imputing missing values, the final item values for all 5 items will be  
459         summed to achieve a raw scale score.  
460
- 461     ▪ Transform the raw scale score:
  - 462         • The raw score is transformed by subtracting the lowest possible raw score from the  
463         actual raw score, dividing by the possible raw score range, and multiplying by 100. This  
464         converts the lowest and highest possible scores to 0 and 100, respectively.  
465

466 • For the general health scale, the following derivation will be used: Transformed Scale  
467 Score = [(actual raw score – 5) ÷ 20] \* 100

468  
469 • The transformed score represents the percentage of the total possible score achieved.

470  
471  
472 The **SF-36 Mental Health Inventory – 5 (MHI-5) Scale** is a 5-item questionnaire that assesses  
473 mental health including depression and anxiety. The mental health items are questions 36b, 36c,  
474 36d, 36f, and 36h on the Full QOL Questionnaire. The possible responses to the 5 items are 1 =  
475 All of the time, 2 = Most of the time, 3 = Some of the time, 4 = A little of the time, and 5 =  
476 None of the time. The transformed mental health scale score will be used for the analyses.  
477 Transformed scores range from 0 to 100; lower scores indicate worse mental health status.

478  
479 The procedures below will be followed to obtain a transformed mental health score:

480  
481 ■ Assign a final value for each item:

482  
483 • The pre-coded values for items 36d and 36h will be reverse coded to obtain the final  
484 value (e.g., a response of ‘1 = All of the time’ will be assigned a value of 5; ‘2 = Most of  
485 the time’ will be assigned a value of 4).

486  
487 • The pre-coded values for items 36b, 36c, and 36f will be retained as the final item value  
488 (e.g., a response of ‘1 = All of the time’ will be assigned a value of 1; ‘2 = Most of the  
489 time’ will be assigned a value of 2).

490  
491 • This process will result in higher values for each item indicating better mental health.

492  
493 ■ Handle missing items:

494  
495 • The “half-scale” rule for imputing missing scores will be applied. That is, if a subject  
496 answered at least 3 of the 5 items, then a person-specific estimate for any missing items  
497 will be imputed. If more than 2 items are missing, then the mental health endpoint will be  
498 considered missing.

499  
500 ■ Compute the raw scale score:

501  
502 • After recoding and imputing missing values, the final item values for all 5 items will be  
503 summed to achieve a raw scale score.

504  
505 ■ Transform the raw scale score:

506 • The raw score is transformed by subtracting the lowest possible raw score from the  
507 actual raw score, dividing by the possible raw score range, and multiplying by 100. This  
508 converts the lowest and highest possible scores to 0 and 100, respectively.

509  
510 • For the mental health scale, the following derivation will be used: Transformed Scale  
511 Score = [(actual raw score – 5) ÷ 20] \* 100

512  
513 • The transformed score represents the percentage of the total possible score achieved.

514  
515 The **SF-36 Physical Functioning Scale** is a 10-item questionnaire that assesses physical  
516 functioning. The physical functioning items are questions 39a, 39b, 39c, 39d, 39e, 39f, 39g, 39h,  
517 39i, and 39j on the Full QOL Questionnaire. The possible responses to the 10 items are 1 = Yes,  
518 limited a lot, 2 = Yes, limited a little, and 3 = No, not limited at all. The transformed physical  
519 functioning scale score will be used for the analyses. Transformed scores range from 0 to 100;  
520 lower scores indicate worse physical functioning status.  
521

522 The procedures below will be followed to obtain a transformed physical functioning score:  
523

- 524     ▪ Assign a final value for each item:
  - 525         • The pre-coded values for all 10 items will be retained as the final item value (e.g., a  
526             response of ‘1 = Yes, limited a lot’ will be assigned a value of 1; ‘2 = Yes, limited a  
527             little’ will be assigned a value of 2).
  - 528         • This process will result in higher values for each item indicating better physical function.  
529
- 530     ▪ Handle missing items:
  - 531         • The “half-scale” rule for imputing missing scores will be applied. That is, if a subject  
532             answered at least 5 of the 10 items, then a person-specific estimate for any missing items  
533             will be imputed. If more than 5 items are missing, then the physical functioning endpoint  
534             will be considered missing.  
535
- 536     ▪ Compute the raw scale score:
  - 537         • After recoding and imputing missing values, the final item values for all 10 items will be  
538             summed to achieve a raw scale score.  
539
- 540     ▪ Transform the raw scale score:
  - 541         • The raw score is transformed by subtracting the lowest possible raw score from the  
542             actual raw score, dividing by the possible raw score range, and multiplying by 100. This  
543             converts the lowest and highest possible scores to 0 and 100, respectively.  
544
  - 545         • For the physical functioning scale, the following derivation will be used: Transformed  
546             Scale Score = [(actual raw score – 10) ÷ 20] \* 100  
547
  - 548         • The transformed score represents the percentage of the total possible score achieved.  
549

550  
551  
552  
553  
554  
555  
556 The **SF-36 Social Functioning Scale** is a 2-item questionnaire that assesses the effect of  
557 physical health or emotional problems on social activities. The social functioning items are  
558 questions 33 and 37 on the Full QOL Questionnaire. The possible responses to the extent of  
559 limitation are 1 = Not at all, 2 = Slightly, 3 = Moderately, 4 = Quite a bit, and 5 = Extremely.  
560 The possible responses to the duration of limitation are 1 = All of the time, 2 = Most of the time,



561 3 = Some of the time, 4 = A little of the time, and 5 = None of the time. The transformed social  
562 functioning scale score will be used for the analyses. Transformed scores range from 0 to 100;  
563 lower scores indicate less social functioning.  
564

565 The procedures below will be followed to obtain the transformed social functioning score:  
566

- 567     ▪ Assign a final value for each item:
  - 568         • The pre-coded values for item 33 will be reverse coded to obtain the final item value
  - 569         (e.g., a response of ‘1 = Not at all’ will be assigned a value of 5; ‘2 = Slight’ will be
  - 570         assigned a value of 4).
  - 571
  - 572         • The pre-coded values for items 37 will be retained as the final item value (e.g., a
  - 573         response of ‘1 = All of the time’ will be assigned a value of 1; ‘2 = Most of the time’ will
  - 574         be assigned a value of 2).
  - 575
  - 576         • This process will result in higher values for each item indicating better social
  - 577         functioning.
  - 578
- 579     ▪ Handle missing items:
  - 580         • The “half-scale” rule for imputing missing scores will be applied. That is, if a subject
  - 581         answered at least 1 of the 2 items, then a person-specific estimate for any missing items
  - 582         will be imputed. If both items are missing, then the social functioning endpoint will be
  - 583         considered missing.
  - 584
  - 585
- 586     ▪ Compute the raw scale score:
  - 587         ○ After recoding and imputing missing values, the final item values for both items will
  - 588         be summed to achieve a raw scale score.
  - 589
  - 590
- 591     ▪ Transform the raw scale score:
  - 592         • The raw score is transformed by subtracting the lowest possible raw score from the
  - 593         actual raw score, dividing by the possible raw score range, and multiplying by 100. This
  - 594         converts the lowest and highest possible scores to 0 and 100, respectively.
  - 595
  - 596         • For the social functioning scale, the following derivation will be used: Transformed
  - 597         Scale Score = [(actual raw score – 2) ÷ 8] \* 100
  - 598
  - 599         • The transformed score represents the percentage of the total possible score achieved.
  - 600
  - 601
  - 602

603 The **SF-36 Bodily Pain Scale** is a 2-item questionnaire that assesses the magnitude and effect of  
604 bodily pain over the past 4 weeks. The social functioning items are questions 34 and 35 on the  
605 Full QOL Questionnaire. The possible responses to the severity of pain are 1 = None, 2 = Very  
606 mild, 3 = Mild, 4 = Moderate, 5 = Severe, and 6 = Very severe. The possible responses to the  
607 effect of pain on work activity are 1 = Not at all, 2 = A little bit, 3 = Moderately, 4 = Quite a bit,

608 and 5 = Extremely. The transformed social functioning scale score will be used for the analyses.  
609 Transformed scores range from 0 to 100; lower scores indicate worse pain status.

610 The procedures below will be followed to obtain the transformed bodily pain score:  
611

612  
613 ■ Assign a final value for each item:

614 • The pre-coded values for both items 34 and 35 will be reverse coded to obtain the final  
615 item value (e.g., a response of ‘1 = None’ will be assigned a value of 6 for item 34; ‘2  
616 = Very mild’ will be assigned a value of 5 for item 34).

617  
618 • This process will result in higher values for each item indicating better pain status.

619 ■ Handle missing items:

620 • The “half-scale” rule for imputing missing scores will be applied. That is, if a subject  
621 answered at least 1 of the 2 items, then a person-specific estimate for any missing  
622 items will be imputed. If both items are missing, then the bodily pain endpoint will be  
623 considered missing.

624 ■ Compute the raw scale score:

625  
626 • After recoding and imputing missing values, the final item values for both items will  
627 be summed to achieve a raw scale score.

628  
629 ■ Transform the raw scale score:

630 • The raw score is transformed by subtracting the lowest possible raw score from the actual  
631 raw score, dividing by the possible raw score range, and multiplying by 100. This  
632 converts the lowest and highest possible scores to 0 and 100, respectively.

633  
634 • For the bodily pain scale, the following derivation will be used: Transformed  
635 Scale Score = [(actual raw score – 2) ÷ 9] \* 100

636  
637 • The transformed score represents the percentage of the total possible score achieved.

638

639 The **SF-36 Vitality Scale** is a 4-item questionnaire that assesses vitality including energy level  
640 and fatigue. The vitality items are questions 36a, 36e, 36g, and 36i on the Full QOL  
641 Questionnaire. The possible responses to the 4 items are 1 = All of the time, 2 = Most of the  
642 time, 3 = Some of the time, 4 = A little of the time, and 5 = None of the time. The transformed  
643 vitality scale score will be used for the analyses. Transformed scores range from 0 to 100; lower  
644 scores indicate less vitality.

645  
646 The procedures below will be followed to obtain the transformed vitality score:

647  
648 ■ Assign a final value for each item:  
649

- 650 • The pre-coded values for items 36a and 36e will be reverse coded to obtain the final item  
651 value (e.g., a response of ‘1 = All of the time’ will be assigned a value of 5; ‘2 = Most of  
652 the time’ will be assigned a value of 4).
- 653
- 654 • The pre-coded values for items 36g, and 36i will be retained as the final item value (e.g.,  
655 a response of ‘1 = All of the time’ will be assigned a value of 1; ‘2 = Most of the time’  
656 will be assigned a value of 2).
- 657
- 658 • This process will result in higher values for each item indicating more vitality.
- 659
- 660 ▪ Handle missing items:
- 661
- 662 • The “half-scale” rule for imputing missing scores will be applied. That is, if a subject  
663 answered at least 2 of the 4 items, then a person-specific estimate for any missing items  
664 will be imputed. If more than 2 items are missing, then the vitality endpoint will be  
665 considered missing.
- 666
- 667 ▪ Compute the raw scale score:
- 668
- 669 • After recoding and imputing missing values, the final item values for all 4 items will be  
670 summed to achieve a raw scale score.
- 671
- 672 ▪ Transform the raw scale score:
- 673
- 674 • The raw score is transformed by subtracting the lowest possible raw score from the  
675 actual raw score, dividing by the possible raw score range, and multiplying by 100. This  
676 converts the lowest and highest possible scores to 0 and 100, respectively.
- 677
- 678 • For the vitality scale, the following derivation will be used: Transformed Scale Score =  
679  $[(\text{actual raw score} - 4) \div 16] * 100$
- 680
- 681 • The transformed score represents the percentage of the total possible score achieved.
- 682
- 683

684 The **SF-36 Role-Physical Scale** is a 4-item questionnaire that assesses physical limitations on  
685 daily activities. The role-physical items are questions 31a, 31b, 31c, and 31d on the Full QOL  
686 Questionnaire. The possible responses to the 4 items are 1 = All of the time, 2 = Most of the  
687 time, 3 = Some of the time, 4 = A little of the time, and 5 = None of the time. The transformed  
688 role-physical scale score will be used for the analyses. Transformed scores range from 0 to 100;  
689 higher scores indicate fewer physical limitations on daily activities.

691 The procedures below will be followed to obtain the transformed role-physical score:

- 693 ▪ Assign a final value for each item:
- 694
- 695 • The pre-coded values for all 4 items will be retained as the final item value (e.g., a  
696 response of ‘1 = All of the time’ will be assigned a value of 1; ‘2 = Most of the time’ will  
697 be assigned a value of 2).

- 698  
699  
700  
701  
702  
703  
704  
705  
706  
707  
708  
709  
710  
711  
712  
713  
714  
715  
716  
717  
718  
719  
720  
721  
722  
723  
724  
725
- This process will result in higher values for each item indicating fewer physical limitations on daily activities.
  - Handle missing items:
    - The “half-scale” rule for imputing missing scores will be applied. That is, if a subject answered at least 2 of the 4 items, then a person-specific estimate for any missing items will be imputed. If more than 2 items are missing, then the role-physical endpoint will be considered missing.
  - Compute the raw scale score:
    - After recoding and imputing missing values, the final item values for all 4 items will be summed to achieve a raw scale score.
  - Transform the raw scale score:
    - The raw score is transformed by subtracting the lowest possible raw score from the actual raw score, dividing by the possible raw score range, and multiplying by 100. This converts the lowest and highest possible scores to 0 and 100, respectively.
    - For the role-physical scale, the following derivation will be used: Transformed Scale Score = [(actual raw score – 4) ÷ 16] \* 100
    - The transformed score represents the percentage of the total possible score achieved.

726 The **SF-36 Role-Emotional Scale** is a 3-item questionnaire that assesses emotional limitations  
727 on daily activities. The role-emotional items are questions 32a, 32b, and 32c on the Full QOL  
728 Questionnaire. The possible responses to these items are 1 = All of the time, 2 = Most of the  
729 time, 3 = Some of the time, 4 = A little of the time, and 5 = None of the time. The transformed  
730 role-emotional scale score will be used for the analyses. Transformed scores range from 0 to  
731 100; higher values indicate fewer emotional problems limiting daily activities.  
732

733 The procedures below will be followed to obtain the transformed bodily pain score:

- 734  
735  
736  
737  
738  
739  
740  
741  
742  
743  
744  
745
- Assign a final value for each item:
    - The pre-coded values for all 3 items will be retained as the final item value (e.g., a response of ‘1 = All of the time’ will be assigned a value of 1; ‘2 = Most of the time’ will be assigned a value of 2).
    - This process will result in higher values for each item indicating fewer emotional limitations on daily activities.
  - Handle missing items:

- 746
- 747
- 748
- 749
- 750
- 751
- 752
- 753
- 754
- 755
- 756
- 757
- 758
- 759
- 760
- 761
- 762
- 763
- 764
- 765
- 766
- The “half-scale” rule for imputing missing scores will be applied. That is, if a subject answered at least 2 of the 3 items, then a person-specific estimate for any missing items will be imputed. If all 3 items are missing, then the role-emotional endpoint will be considered missing.
  - Compute the raw scale score:
    - After recoding and imputing missing values, the final item values for both items will be summed to achieve a raw scale score.
  - Transform the raw scale score:
    - The raw score is transformed by subtracting the lowest possible raw score from the actual raw score, dividing by the possible raw score range, and multiplying by 100. This converts the lowest and highest possible scores to 0 and 100, respectively.
    - For the role-emotional scale, the following derivation will be used: Transformed Scale Score = [(actual raw score – 3) ÷ 12] \* 100
    - The transformed score represents the percentage of the total possible score achieved.

767 **EuroQoL**

768 The **EQ-5D-3L**<sup>15</sup> is a 5-item questionnaire that measures health status on 5 dimensions:  
769 mobility, self-care, usual activities, pain/discomfort, and anxiety/depression. This instrument  
770 was collected with the clinical CRF.

771 There are 3 levels of response for each dimension: 1) no problems, 2) some problems, 3)  
772 extreme problems. Level one is coded as 1; level two is coded as 2; and level three is coded as 3.  
773 For example, the possible responses for the mobility dimension are 1 = I have no problems in  
774 walking about, 2 = I have some problems in walking about, 3 = I am confined to bed. A unique  
775 health state for each subject is achieved by combining the level from each of the 5 dimensions,  
776 which is referred to as a 5-digit code. A total of 243 possible health states are defined in this  
777 way. If any of the 5 items are missing, then the EQ-5D-3L endpoint will be considered missing.  
778 Otherwise, the descriptive health states will be converted into a summary index score by  
779 applying an algorithm that assigns weights to each level in each dimension.

780 The **EQ VAS** is a vertical, visual analogue scale where the ends are labeled ‘best imaginable  
781 health state’ and ‘worst imaginable health state.’ This instrument was collected with the clinical  
782 CRF.

783  
784 If the VAS score is missing, the EQ VAS endpoint will be considered missing. The VAS score  
785 ranges from 0 to 100; lower scores indicate worse health.

786  
787  
788  
789  
790

**Stanford Presenteeism Scale (SPS-6)**

791 The **SPS-6**<sup>16</sup> is a validated 6-item questionnaire used to measure the impact of a worker’s  
792 perceived ability to concentrate on work tasks despite the distractions of health impairments and  
793 pain. It is captured by questions 25a to 25f on the Full QOL Questionnaire. The recall period is  
794 one month.

795  
796 Responses are graded on a Likert 5-item response scale ranging from “Disagree strongly” to  
797 “Agree strongly.”

798  
799 Items 25a, 25c, and 25d are scored as follows: “Disagree strongly” = 5; “Disagree somewhat” =  
800 4; “Uncertain” = 3; “Agree somewhat” = 2; and “Agree strongly” = 1. Items 25b, 25e, and 25f  
801 are scored as follows: “Disagree strongly” = 1; “Disagree somewhat” = 2; “Uncertain” = 3;  
802 “Agree somewhat” = 4; and “Agree strongly” = 5.

803  
804 Then scores are summed for the SPS-6 total score. Scores can range from 6 to 30, with lower  
805 scores indicating lower presenteeism, and higher scores indicating higher presenteeism.

806  
807 Handle Missing Items:

808 If one or more items are missing, the SPS-6 endpoint will be considered missing.

## 809 810 811 **Work Productivity and Activity Impairment Scale (WPAI)**

812  
813 The **WPAI**<sup>17</sup> is a 6-item questionnaire that assesses the amount of absenteeism, presenteeism,  
814 and daily activity impairment attributable to health. It is comprised of questions 26 through 30  
815 on the Full QOL Questionnaire. Outcomes are expressed as impairment percentages, with higher  
816 numbers indicating greater impairment and less productivity (i.e., worse outcomes) as follows:

### 817 818 **WPAI:GH**

819 WPAI General Health outcomes are expressed as impairment percentages, with higher numbers  
820 indicating greater impairment and less productivity, i.e., worse outcomes, as follows:

| WPAI Questionnaire                                    | CABANA Full QOL Questionnaire Number |
|-------------------------------------------------------|--------------------------------------|
| 1 = currently employed                                | 26                                   |
| 2 = hours missed due to health problems               | 27                                   |
| 3 = hours missed other reasons                        | 28                                   |
| 4 = hours actually worked                             | 29                                   |
| 5 = degree health affected productivity while working | 30                                   |
| 6 = degree health affected regular activities         | N/A                                  |

823  
824 *Scores:*

825 Multiply scores by 100 to express in percentages.

826  
827 Percent work time missed due to health:  $Q2/(Q2+Q4)$

828  
829 Percent impairment while working due to health:  $Q5/10$

830  
831  
832  
833  
834  
835  
836  
837  
838  
839  
840  
841  
842  
843  
844  
845  
846  
847  
848  
849  
850  
851  
852  
853  
854  
855  
856  
857  
858  
859  
860  
861  
862  
863  
864  
865  
866  
867  
868  
869  
870  
871  
872  
873  
874  
875  
876  
877

Percent overall work impairment due to health:  
$$Q2/(Q2+Q4)+[(1-(Q2/(Q2+Q4)))]x(Q5/10]$$

Handle Missing Items:

If one or more items are missing, the WPAI:GH endpoint will be considered missing.

### 6.2.2. Secondary QOL Endpoint Analysis Methods

The DASI, AFSS, SF-36, EQ-5D, SPS-6, and WPAI endpoints will be analyzed as interval-scale outcome measures using the previously described repeated measures mixed model. The treatment effects will be examined at all assessment time points.

### 6.3. Subgroup Analyses

- Age (<65 , 65 to 74, and ≥75 years)
- Sex (male vs. female)
- Race (white vs. racial minorities)
- AF type (paroxysmal vs. persistent, or long-standing persistent)
- Years since onset of AF (>1 vs ≤1)
- Days from most recent qualifying episode of atrial fibrillation to enrollment (>12 vs ≤12 days)
- NYHA Heart Failure Class at enrollment (no heart failure or Class I vs. ≥ Class II )
- History of congestive heart failure (yes vs. no)
- Structural heart disease (present vs. absent)
- Hypertension (present vs. absent)
- Hypertension with LVH (present vs. absent)
- CHADS2 (0 or 1 vs >1)
- CHA<sub>2</sub>DS<sub>2</sub>-VASc score (0 or 1 vs >1)
- Sleep Apnea (present vs. absent)
- Family history of atrial fibrillation (yes vs. no)
- Obesity (BMI ≥30 vs. < 30)
- Left ventricular ejection fraction (LVEF) (≤35 vs >35)
- North American vs. other international sites

The main subgroups examined in the QOL data analysis will be those identified as of highest interest for the clinical analysis (see the CABANA clinical SAP). The estimated treatment effect of catheter ablation within each of the subgroup sets listed above will be examined. The interaction between subgroup and treatment will be evaluated. The subgroup analyses will be conducted on the primary model/analysis for each of the two co-primary QOL endpoints (AFEQT and MAFSI). The subgroup analyses will not be repeated in the various sensitivity analyses or for the exploratory endpoints unless the co-primary or clinical analyses identify important subgroup effects.

878 **7. REFERENCES**

879

- 880 1. Dorian P, Jung W, Newman D, Paquette M, Wood K, Ayers GM, Camm J, Akhtar M,  
881 Luderitz B. The impairment of health-related quality of life in patients with intermittent atrial  
882 fibrillation: implications for the assessment of investigational therapy. *J Am Coll Cardiol.*  
883 2000;36(4):1303-9. Epub 2000/10/12. PubMed PMID: 11028487.
- 884 2. Thrall G, Lane D, Carroll D, Lip GY. Quality of life in patients with atrial fibrillation: a  
885 systematic review. *Am J Med.* 2006;119(5):448 e1-19. Epub 2006/05/03. doi:  
886 10.1016/j.amjmed.2005.10.057. PubMed PMID: 16651058.
- 887 3. Singh SN, Tang XC, Singh BN, Dorian P, Reda DJ, Harris CL, Fletcher RD, Sharma SC,  
888 Atwood JE, Jacobson AK, Lewis HD, Jr., Lopez B, Raisch DW, Ezekowitz MD, Investigators S-T.  
889 Quality of life and exercise performance in patients in sinus rhythm versus persistent atrial  
890 fibrillation: a Veterans Affairs Cooperative Studies Program Substudy. *J Am Coll Cardiol.*  
891 2006;48(4):721-30. Epub 2006/08/15. doi: 10.1016/j.jacc.2006.03.051. PubMed PMID: 16904540.
- 892 4. Wazni OM, Marrouche NF, Martin DO, Verma A, Bhargava M, Saliba W, Bash D,  
893 Schweikert R, Brachmann J, Gunther J, Gutleben K, Pisano E, Potenza D, Fanelli R, Raviele A,  
894 Themistoclakis S, Rossillo A, Bonso A, Natale A. Radiofrequency ablation vs antiarrhythmic drugs  
895 as first-line treatment of symptomatic atrial fibrillation: a randomized trial. *JAMA.*  
896 2005;293(21):2634-40. Epub 2005/06/02. doi: 10.1001/jama.293.21.2634. PubMed PMID:  
897 15928285.
- 898 5. Oral H, Pappone C, Chugh A, Good E, Bogun F, Pelosi F, Jr., Bates ER, Lehmann MH,  
899 Vicedomini G, Augello G, Agricola E, Sala S, Santinelli V, Morady F. Circumferential pulmonary-  
900 vein ablation for chronic atrial fibrillation. *N Engl J Med.* 2006;354(9):934-41. Epub 2006/03/03.  
901 doi: 10.1056/NEJMoa050955. PubMed PMID: 16510747.
- 902 6. Cosedis Nielsen J, Johannessen A, Raatikainen P, Hindricks G, Walfridsson H, Kongstad O,  
903 Pehrson S, Englund A, Hartikainen J, Mortensen LS, Hansen PS. Radiofrequency ablation as initial  
904 therapy in paroxysmal atrial fibrillation. *N Engl J Med.* 2012;367(17):1587-95. Epub 2012/10/26.  
905 doi: 10.1056/NEJMoa1113566. PubMed PMID: 23094720.
- 906 7. Nielsen JC, Johannessen A, Raatikainen P, Hindricks G, Walfridsson H, Pehrson SM,  
907 Englund A, Hartikainen J, Mortensen LS, Hansen PS, Investigators M-P. Long-term efficacy of  
908 catheter ablation as first-line therapy for paroxysmal atrial fibrillation: 5-year outcome in a  
909 randomised clinical trial. *Heart.* 2017;103(5):368-76. Epub 2016/08/28. doi: 10.1136/heartjnl-2016-  
910 309781. PubMed PMID: 27566295.
- 911 8. Morillo CA, Verma A, Connolly SJ, Kuck KH, Nair GM, Champagne J, Sterns LD, Beresh  
912 H, Healey JS, Natale A, Investigators R-. Radiofrequency ablation vs antiarrhythmic drugs as first-  
913 line treatment of paroxysmal atrial fibrillation (RAAFT-2): a randomized trial. *JAMA.*  
914 2014;311(7):692-700. Epub 2014/02/20. doi: 10.1001/jama.2014.467. PubMed PMID: 24549549.
- 915 9. Reynolds MR, Walczak J, White SA, Cohen DJ, Wilber DJ. Improvements in symptoms and  
916 quality of life in patients with paroxysmal atrial fibrillation treated with radiofrequency catheter  
917 ablation versus antiarrhythmic drugs. *Circ Cardiovasc Qual Outcomes.* 2010;3(6):615-23. Epub  
918 2010/10/14. doi: 10.1161/CIRCOUTCOMES.110.957563. PubMed PMID: 20940250.
- 919 10. Pappone C, Vicedomini G, Augello G, Manguso F, Saviano M, Baldi M, Petretta A,  
920 Giannelli L, Calovic Z, Guluta V, Tavazzi L, Santinelli V. Radiofrequency catheter ablation and  
921 antiarrhythmic drug therapy: a prospective, randomized, 4-year follow-up trial: the APAF study.  
922 *Circ Arrhythm Electrophysiol.* 2011;4(6):808-14. Epub 2011/09/29. doi:  
923 10.1161/CIRCEP.111.966408. PubMed PMID: 21946315.



- 924 11. Spertus J, Dorian P, Bubien R, Lewis S, Godejohn D, Reynolds MR, Lakkireddy DR,  
925 Wimmer AP, Bhandari A, Burk C. Development and validation of the Atrial Fibrillation Effect on  
926 QualiTy-of-Life (AFEQT) Questionnaire in patients with atrial fibrillation. *Circ Arrhythm*  
927 *Electrophysiol.* 2011;4(1):15-25. Epub 2010/12/17. doi: 10.1161/CIRCEP.110.958033. PubMed  
928 PMID: 21160035.
- 929 12. Wokhlu A, Monahan KH, Hodge DO, Asirvatham SJ, Friedman PA, Munger TM, Bradley  
930 DJ, Bluhm CM, Haroldson JM, Packer DL. Long-term quality of life after ablation of atrial  
931 fibrillation the impact of recurrence, symptom relief, and placebo effect. *J Am Coll Cardiol.*  
932 2010;55(21):2308-16. Epub 2010/05/22. doi: 10.1016/j.jacc.2010.01.040. PubMed PMID:  
933 20488300.
- 934 13. Hlatky MA, Boineau RE, Higginbotham MB, Lee KL, Mark DB, Califf RM, Cobb FR,  
935 Pryor DB. A brief self-administered questionnaire to determine functional capacity (the Duke  
936 Activity Status Index). *Am J Cardiol.* 1989;64(10):651-4. Epub 1989/09/15. doi: 0002-  
937 9149(89)90496-7 [pii]. PubMed PMID: 2782256.
- 938 14. Ware J, Jr., Snow KK, Kosinski M, Gandek B. *SF-36 Health Survey: Manual &*  
939 *Interpretation Guide.* Boston: The Health Institute, New England Medical Center; 1993.
- 940 15. EuroQol--a new facility for the measurement of health-related quality of life. The EuroQol  
941 Group. *Health Policy.* 1990;16(3):199-208. Epub 1990/11/05. PubMed PMID: 10109801.
- 942 16. Turpin RS, Ozminkowski RJ, Sharda CE, Collins JJ, Berger ML, Billotti GM, Baase CM,  
943 Olson MJ, Nicholson S. Reliability and validity of the Stanford Presenteeism Scale. *J Occup*  
944 *Environ Med.* 2004;46(11):1123-33. Epub 2004/11/10. PubMed PMID: 15534499.
- 945 17. Reilly MC, Zbrozek AS, Dukes EM. The validity and reproducibility of a work productivity  
946 and activity impairment instrument. *Pharmacoeconomics.* 1993;4(5):353-65. Epub 1993/10/05.  
947 PubMed PMID: 10146874.  
948

949 **8. SOFTWARE**

950

951 SAS<sup>®</sup> Software Version 9.4 or higher. SAS Institute Inc., Cary, NC, USA.

952  
953  
954

## 9. SAP REVISION

| Revision Date   | Section | Summary of Revision                                                                                                                                                                                                                                                                                                                                                                                                                                                                                                                                                                                                                                                                                                                                                                                                                                                                                                             | Reason for Revision                                                                                                                                                                                                                                                                                  |
|-----------------|---------|---------------------------------------------------------------------------------------------------------------------------------------------------------------------------------------------------------------------------------------------------------------------------------------------------------------------------------------------------------------------------------------------------------------------------------------------------------------------------------------------------------------------------------------------------------------------------------------------------------------------------------------------------------------------------------------------------------------------------------------------------------------------------------------------------------------------------------------------------------------------------------------------------------------------------------|------------------------------------------------------------------------------------------------------------------------------------------------------------------------------------------------------------------------------------------------------------------------------------------------------|
| May 5, 2018     | 6.1.1   | $100 - [(4 - 4) / 4 \times 6] \times 100 = 100 - [0 / 36] \times 100 = 100$<br>Was changed to:<br>$100 - [(4 - 4) / 4 \times 6] \times 100 = 100 - [0 / 24] \times 100 = 100$                                                                                                                                                                                                                                                                                                                                                                                                                                                                                                                                                                                                                                                                                                                                                   | The St. Jude scoring instructions included an error in the interpretation example. Although it did not change the scoring instructions, the error was corrected to avoid confusion.                                                                                                                  |
| June 1, 2018    | 6.1.2   | Follow-up was corrected from 48 months to 60 months                                                                                                                                                                                                                                                                                                                                                                                                                                                                                                                                                                                                                                                                                                                                                                                                                                                                             | We had sufficient precision to use data out to 60 months.                                                                                                                                                                                                                                            |
| June 29, 2018   | 6.2.1   | The Likert responses for the SPS were reversed.                                                                                                                                                                                                                                                                                                                                                                                                                                                                                                                                                                                                                                                                                                                                                                                                                                                                                 | Upon coding the SPS-6, it was noted that the Likert responses were reversed and required correction for accurate scoring.                                                                                                                                                                            |
| August 4, 2018  | 6.1.1   | A change to AFEQT response allocation was made as follows:<br><br>"Patients who haven't had A-Fib in more than a year have problems answering AFEQT questions. Discussed with Drs. Spertus & Mark. If says 'no AF symptoms' use response options :<br><ul style="list-style-type: none"> <li>o "Not Bothered at All OR I Did Not Have This Symptom"</li> <li>o "Not At All Limited"</li> <li>o "Not At All Bothered"</li> <li>o "No Difficulty At All"</li> <li>o "Not Applicable"</li> <li>o "Strongly Disagree" (work questions)</li> </ul> FOR intervals > 18 months: If patient states " I haven't had Atrial Fibrillation >1 year ago OR say "I was never aware of having atrial fibrillation", use skip pattern:<br>Brief Follow-Up QX (18, 30 and 42 Mo intervals) skip qxs # 3-7<br>Full Follow-up QX (24, 36, and 48 Mo intervals) skip qxx # 15-19<br>Proxy QX (18, 24, 30, 36, 42, 48 Mo intervals) skip qxs # 15-17 | A change to the AFEQT questionnaire data collection was made on May 12, 2012 to address patient confusion about the questionnaire. This change deviated from the published instructions for scoring the AFEQT, and our analysis was adjusted to adhere to rules set during the conduct of the trial. |
| August 13, 2018 | 6.1.1   | The AFEQT scoring is to include only responses with at least 50% of responses in each domain.                                                                                                                                                                                                                                                                                                                                                                                                                                                                                                                                                                                                                                                                                                                                                                                                                                   | The 50% rule was not included in the official St. Jude AFEQT Scoring Instructions. However, further review of the validation paper (reference 11) states, "at least 50% of completed responses for each domain are required to calculate a meaningful score" so                                      |

955

|  |  |  |                                     |
|--|--|--|-------------------------------------|
|  |  |  | this was added to the scoring code. |
|--|--|--|-------------------------------------|
