# Supplementary material
Source: PubMed Central journal article supplement (PMC6450275)
Supplement: jama-e190692-s003.pdf [file jama-e190692-s003.pdf]

## Data Sharing Statement

Mark. Effect of Catheter Ablation vs Medical Therapy on Quality of Life Among Patients With Atrial Fibrillation. *JAMA*. Published March 15, 2019. 10.1001/jama.2019.0692

### Data

**Data available:** No

### Additional Information

**Explanation for why data not available:** We will follow the NIH requirements for data sharing.
